# Supplementary material for: Long-term cardiovascular outcomes of COVID-19
Source: PubMed Central journal article supplement (PMC8938267; doi:10.1038/s41591-022-01689-3), 2022-02-07
Supplement: 41591_2022_1689_MOESM1_ESM.pdf [file 41591_2022_1689_MOESM1_ESM.pdf]

---

**Supplementary information**

---

**Long-term cardiovascular outcomes of  
COVID-19**

---

In the format provided by the  
authors and unedited

## Long-term Cardiovascular Outcomes of COVID-19

| <b>Table of Contents</b>                                                                                                                                                                                                             | <b>Page</b> |
|--------------------------------------------------------------------------------------------------------------------------------------------------------------------------------------------------------------------------------------|-------------|
| Supplementary Table 1. Demographic and health characteristics of COVID-19, contemporary, and historical cohorts before weighting                                                                                                     | 3-4         |
| Supplementary Table 2. Demographic and health characteristics of COVID-19, contemporary, and historical cohorts after weighting                                                                                                      | 5-6         |
| Supplementary Table 3. Risks and 12-month burdens of incident post-acute COVID-19 cardiovascular outcomes compared to contemporary control                                                                                           | 7-8         |
| Supplementary Table 4. Subgroup analyses of the risks of incident post-acute COVID-19 composite cardiovascular outcomes compared to contemporary control                                                                             | 9-10        |
| Supplementary Table 5. Risks and 12-month burdens of incident post-acute COVID-19 cardiovascular outcomes in participants without any history of cardiovascular outcomes prior to COVID-19 exposure compared to contemporary control | 11-12       |
| Supplementary Table 6. Demographic and health characteristics of the COVID-19 and contemporary cohorts by care setting of the acute infection before weighting                                                                       | 13-14       |
| Supplementary Table 7. Demographic and health characteristics of the COVID-19 and contemporary cohorts by care setting of the acute infection after weighting                                                                        | 15-16       |
| Supplementary Table 8. Risks and 12-month burdens of incident post-acute COVID-19 cardiovascular outcomes by care setting of the acute infection compared to contemporary control                                                    | 17-19       |
| Supplementary Table 9. Risks and 12-month burdens of incident post-acute COVID-19 cardiovascular outcomes compared to historical control                                                                                             | 20-21       |
| Supplementary Table 10. Subgroup analyses of the risks of incident post-acute COVID-19 composite cardiovascular outcomes compared to historical control                                                                              | 22-23       |
| Supplementary Table 11. Risks and 12-month burdens of incident post-acute COVID-19 cardiovascular outcomes in participants without any history of cardiovascular outcomes prior to COVID-19 exposure compared to historical control  | 24-25       |
| Supplementary Table 12. Demographic and health characteristics of the COVID-19 and historical cohorts by care setting of the acute infection before weighting                                                                        | 26-27       |
| Supplementary Table 13. Demographic and health characteristics of the COVID-19 and historical cohorts by care setting of the acute infection after weighting                                                                         | 28-29       |
| Supplementary Table 14. Risks and 12-month burdens of incident post-acute COVID-19 cardiovascular outcomes by care setting of the acute infection compared to historical control                                                     | 30-32       |

|                                                                                                                                                                                                                             |       |
|-----------------------------------------------------------------------------------------------------------------------------------------------------------------------------------------------------------------------------|-------|
| Supplementary Table 15. Difference-in-differences analyses of incident rate ratios of cardiovascular outcomes before and after exposure to COVID-19 compared to contemporary control                                        | 33-34 |
| Supplementary Table 16. Difference-in-differences analyses of incident rate ratios of cardiovascular outcomes before and after exposure to COVID-19 by care setting of the acute infection compared to contemporary control | 35-37 |
| Supplementary Table 17. Difference-in-differences analyses of incident rate ratios of cardiovascular outcomes before and after exposure to COVID-19 compared to historical control                                          | 38-39 |
| Supplementary Table 18. Difference-in-differences analyses of incident rate ratios of cardiovascular outcomes before and after exposure to COVID-19 by care setting of the acute infection compared to historical control   | 40-42 |
| Supplementary Table 19. Sensitivity analysis for MACE and any cardiovascular outcome compared to contemporary and historical controls                                                                                       | 43    |
| Supplementary Table 20. Sensitivity analyses for MACE and any cardiovascular outcome by care setting of the acute infection compared to contemporary and historical controls                                                | 44    |
| Supplementary Table 21. Risks of incident post-acute COVID-19 myocarditis and pericarditis compared to contemporary control in analyses where cohort participants are censored at time of vaccination                       | 45    |
| Supplementary Table 22. Risks of incident post-acute COVID-19 myocarditis and pericarditis compared to contemporary control in analyses adjusting for time varying COVID-19 vaccination                                     | 46    |
| Supplementary Table 23. Risks of incident post-acute COVID-19 myocarditis and pericarditis compared to historical control in analyses where cohort participants are censored at time of vaccination                         | 47    |
| Supplementary Table 24. Risks of incident post-acute COVID-19 myocarditis and pericarditis compared to historical control in analyses adjusting for time varying COVID-19 vaccination                                       | 48    |
| Supplementary Table 25. Positive and negative outcome controls                                                                                                                                                              | 49    |
| Supplementary Table 26. Negative exposure control: risks and 12-month burdens of cardiovascular outcomes of those vaccinated for influenza on even-numbered days compared to those vaccinated on odd-numbered days          | 50-51 |

Supplementary Table 1. Demographic and health characteristics of COVID-19, contemporary, and historical controls before weighting

| Baseline Characteristics                         | COVID-19<br>(N=153,760) | Contemporary<br>control<br>(N=5,637,647) | Historical control<br>(N=5,859,411) | Absolute<br>standardized<br>difference –<br>COVID-19 and<br>Contemporary<br>control | Absolute<br>standardized<br>difference –<br>COVID-19 and<br>Historical<br>control |
|--------------------------------------------------|-------------------------|------------------------------------------|-------------------------------------|-------------------------------------------------------------------------------------|-----------------------------------------------------------------------------------|
| <b>Age, mean (std), yr</b>                       | 61.42 (15.64)           | 63.46 (16.23)                            | 62.90 (16.48)                       | 0.13                                                                                | 0.09                                                                              |
| <b>Race, no. (%)</b>                             |                         |                                          |                                     |                                                                                     |                                                                                   |
| White                                            | 108,978 (70.88)         | 4,328,756 (76.78)                        | 4,532,542 (77.35)                   | 0.13                                                                                | 0.15                                                                              |
| Black                                            | 37,113 (24.14)          | 1,042,153 (18.49)                        | 1,051,656 (17.95)                   | 0.14                                                                                | 0.15                                                                              |
| Other                                            | 7,669 (4.99)            | 266,738 (4.73)                           | 275,213 (4.70)                      | 0.01                                                                                | 0.01                                                                              |
| <b>Sex, no. (%)</b>                              |                         |                                          |                                     |                                                                                     |                                                                                   |
| Male                                             | 136,912 (89.04)         | 5,091,519 (90.31)                        | 5,308,854 (90.60)                   | 0.04                                                                                | 0.05                                                                              |
| Female                                           | 16,848 (10.96)          | 546,128 (9.69)                           | 550,557 (9.40)                      | 0.04                                                                                | 0.05                                                                              |
| <b>BMI category, no. (%), kg/m<sup>2</sup></b>   |                         |                                          |                                     |                                                                                     |                                                                                   |
| BMI ≤ 25                                         | 22,192 (14.43)          | 1,099,292 (19.50)                        | 1,162,294 (19.84)                   | 0.14                                                                                | 0.14                                                                              |
| 25 < BMI ≤ 30                                    | 48,786 (31.73)          | 2,158,693 (38.29)                        | 2,296,904 (39.20)                   | 0.14                                                                                | 0.16                                                                              |
| BMI > 30                                         | 82,782 (53.84)          | 2,379,662 (42.21)                        | 2,400,213 (40.96)                   | 0.23                                                                                | 0.26                                                                              |
| <b>Smoking status, no. (%)</b>                   |                         |                                          |                                     |                                                                                     |                                                                                   |
| Never                                            | 69,127 (44.96)          | 2,398,958 (42.55)                        | 3,086,138 (52.67)                   | 0.05                                                                                | 0.15                                                                              |
| Former                                           | 61,084 (39.73)          | 2,031,298 (36.03)                        | 1,444,066 (24.65)                   | 0.08                                                                                | 0.33                                                                              |
| Current                                          | 23,549 (15.32)          | 1,207,391 (21.42)                        | 1,329,207 (22.69)                   | 0.16                                                                                | 0.19                                                                              |
| <b>Area Deprivation Index*,<br/>mean (std)</b>   | 55.32 (18.59)           | 54.65 (19.05)                            | 54.62 (19.13)                       | 0.04                                                                                | 0.04                                                                              |
| <b>Clinical Characteristics</b>                  |                         |                                          |                                     |                                                                                     |                                                                                   |
| <b>Outpatient encounter<sup>†</sup>, no. (%)</b> |                         |                                          |                                     |                                                                                     |                                                                                   |
| Zero                                             | 4,156 (2.70)            | 666,096 (11.82)                          | 654,793 (11.18)                     | 0.36                                                                                | 0.34                                                                              |
| One                                              | 26,483 (17.22)          | 1,784,211 (31.65)                        | 1,775,335 (30.30)                   | 0.34                                                                                | 0.31                                                                              |
| Two or more                                      | 123,121 (80.07)         | 3,187,340 (56.54)                        | 3,429,283 (58.53)                   | 0.52                                                                                | 0.48                                                                              |
| <b>Long-term care, no. (%)</b>                   | 6,107 (3.97)            | 33,611 (0.60)                            | 47,384 (0.81)                       | 0.23                                                                                | 0.21                                                                              |

|                                                   |                |                   |                   |      |      |
|---------------------------------------------------|----------------|-------------------|-------------------|------|------|
| <b>eGFR, mean (std), ml/min/1.73m<sup>2</sup></b> | 77.74 (22.50)  | 78.59 (20.15)     | 79.31 (19.95)     | 0.04 | 0.07 |
| <b>Systolic blood pressure, mean (std), mmHg</b>  | 132.65 (11.74) | 132.65 (12.29)    | 132.63 (12.63)    | 0.00 | 0.00 |
| <b>Diastolic blood pressure, mean (std), mmHg</b> | 78.32 (7.42)   | 77.77 (7.54)      | 77.53 (7.91)      | 0.07 | 0.10 |
| <b>Cancer, no. (%)</b>                            | 12,524 (8.15)  | 344,668 (6.11)    | 345,608 (5.90)    | 0.08 | 0.09 |
| <b>Chronic kidney disease, no. (%)</b>            | 30,009 (19.52) | 940,048 (16.67)   | 902,029 (15.39)   | 0.07 | 0.11 |
| <b>Chronic lung disease, no. (%)</b>              | 23,469 (15.26) | 609,531 (10.81)   | 652,107 (11.13)   | 0.13 | 0.12 |
| <b>Dementia, no. (%)</b>                          | 9,497 (6.18)   | 172,128 (3.05)    | 191,866 (3.27)    | 0.15 | 0.14 |
| <b>Diabetes mellitus type 2, no. (%)</b>          | 49,407 (32.13) | 1,272,500 (22.57) | 1,330,448 (22.71) | 0.22 | 0.21 |
| <b>Dysautonomia, no. (%)</b>                      | 2,812 (1.83)   | 67,704 (1.20)     | 72,975 (1.25)     | 0.05 | 0.05 |
| <b>Hyperlipidemia, no. (%)</b>                    | 52,227 (33.97) | 1,435,909 (25.47) | 1,810,965 (30.91) | 0.19 | 0.07 |
| <b>Hypertension, no. (%)</b>                      | 41,060 (26.70) | 1,484,884 (26.34) | 1,540,087 (26.28) | 0.01 | 0.01 |

\*. Area Deprivation Index is a measure of socioeconomic disadvantage, with a range from low to high disadvantage of 0 to 100.

†. Data collected within one year of cohort enrollment

std, standard deviation; BMI, body mass index; eGFR, estimated glomerular filtration rate.

Supplementary Table 2. Demographic and health characteristics of COVID-19, contemporary, and historical controls after weighting

| Baseline Characteristics                         | COVID-19<br>(N=153,760) | Contemporary<br>control (N=5,637,647) | Historical control<br>(N=5,859,411) | Absolute<br>standardized<br>difference -<br>COVID-19 and<br>Contemporary<br>control | Absolute<br>standardized<br>difference -<br>COVID-19 and<br>Historical<br>control |
|--------------------------------------------------|-------------------------|---------------------------------------|-------------------------------------|-------------------------------------------------------------------------------------|-----------------------------------------------------------------------------------|
| <b>Age, mean (std), yr</b>                       | 63.52 (16.10)           | 63.41 (16.22)                         | 63.35 (16.30)                       | 0.01                                                                                | 0.01                                                                              |
| <b>Race, no. (%)</b>                             |                         |                                       |                                     |                                                                                     |                                                                                   |
| White                                            | 116,971 (76.07)         | 4,320,467 (76.64)                     | 4,488,485 (76.60)                   | 0.01                                                                                | 0.01                                                                              |
| Black                                            | 29,473 (19.17)          | 1,050,125 (18.63)                     | 1,091,960 (18.64)                   | 0.01                                                                                | 0.01                                                                              |
| Other                                            | 7,316 (4.76)            | 267,112 (4.74)                        | 278,967 (4.76)                      | 0.00                                                                                | 0.00                                                                              |
| <b>Sex, no. (%)</b>                              |                         |                                       |                                     |                                                                                     |                                                                                   |
| Male                                             | 137,617 (89.50)         | 5,089,442 (90.28)                     | 5,288,411 (90.26)                   | 0.03                                                                                | 0.03                                                                              |
| Female                                           | 16,143 (10.50)          | 548,205 (9.72)                        | 571,000 (9.75)                      | 0.03                                                                                | 0.03                                                                              |
| <b>BMI category, no. (%), kg/m<sup>2</sup></b>   |                         |                                       |                                     |                                                                                     |                                                                                   |
| BMI ≤ 25                                         | 30,079 (19.56)          | 1,092,801 (19.38)                     | 1,138,601 (19.43)                   | 0.00                                                                                | 0.00                                                                              |
| 25 < BMI ≤ 30                                    | 54,788 (35.63)          | 2,149,127 (38.12)                     | 2,244,506 (38.31)                   | 0.05                                                                                | 0.06                                                                              |
| BMI > 30                                         | 68,895 (44.81)          | 2,395,718 (42.50)                     | 2,476,304 (42.26)                   | 0.05                                                                                | 0.05                                                                              |
| <b>Smoking status, no. (%)</b>                   |                         |                                       |                                     |                                                                                     |                                                                                   |
| Never                                            | 61,979 (40.31)          | 2,401,638 (42.60)                     | 2,493,062 (42.55)                   | 0.05                                                                                | 0.05                                                                              |
| Former                                           | 57,296 (37.26)          | 2,036,938 (36.13)                     | 2,120,814 (36.20)                   | 0.02                                                                                | 0.02                                                                              |
| Current                                          | 34,485 (22.43)          | 1,199,128 (21.27)                     | 1,245,594 (21.26)                   | 0.03                                                                                | 0.03                                                                              |
| <b>Area Deprivation Index*, mean (std)</b>       | 55.11 (18.96)           | 54.66 (19.04)                         | 54.67 (19.02)                       | 0.02                                                                                | 0.02                                                                              |
| <b>Clinical Characteristics</b>                  |                         |                                       |                                     |                                                                                     |                                                                                   |
| <b>Outpatient encounter<sup>†</sup>, no. (%)</b> |                         |                                       |                                     |                                                                                     |                                                                                   |
| Zero                                             | 15,530 (10.10)          | 652,389 (11.57)                       | 669,262 (11.42)                     | 0.05                                                                                | 0.04                                                                              |
| One                                              | 42,492 (27.64)          | 1,761,821 (31.25)                     | 1,837,511 (31.36)                   | 0.08                                                                                | 0.08                                                                              |
| Two or more                                      | 95,739 (62.27)          | 3,223,437 (57.18)                     | 3,352,579 (57.22)                   | 0.10                                                                                | 0.10                                                                              |
| <b>Long-term care, no. (%)</b>                   | 1,719 (1.12)            | 39,125 (0.69)                         | 41,074 (0.70)                       | 0.04                                                                                | 0.04                                                                              |

|                                                                                                                                                                                                                                                                                                      |                |                   |                   |      |      |
|------------------------------------------------------------------------------------------------------------------------------------------------------------------------------------------------------------------------------------------------------------------------------------------------------|----------------|-------------------|-------------------|------|------|
| <b>eGFR, mean (std), ml/min/1.73m<sup>2</sup></b>                                                                                                                                                                                                                                                    | 78.31 (20.78)  | 78.57 (20.21)     | 78.63 (20.31)     | 0.01 | 0.02 |
| <b>Systolic blood pressure, mean (std), mmHg</b>                                                                                                                                                                                                                                                     | 132.47 (12.31) | 132.65 (12.28)    | 132.55 (12.36)    | 0.01 | 0.01 |
| <b>Diastolic blood pressure, mean (std), mmHg</b>                                                                                                                                                                                                                                                    | 77.65 (7.55)   | 77.79 (7.54)      | 77.78 (7.58)      | 0.02 | 0.02 |
| <b>Cancer, no. (%)</b>                                                                                                                                                                                                                                                                               | 10,709 (6.97)  | 348,463 (6.18)    | 337,209 (5.76)    | 0.03 | 0.05 |
| <b>Chronic kidney disease, no. (%)</b>                                                                                                                                                                                                                                                               | 27,326 (17.77) | 944,137 (16.75)   | 980,045 (16.73)   | 0.03 | 0.03 |
| <b>Chronic lung disease, no. (%)</b>                                                                                                                                                                                                                                                                 | 20,218 (13.15) | 617,097 (10.95)   | 641,664 (10.95)   | 0.07 | 0.07 |
| <b>Dementia, no. (%)</b>                                                                                                                                                                                                                                                                             | 6,127 (3.99)   | 176,853 (3.14)    | 184,044 (3.14)    | 0.05 | 0.05 |
| <b>Diabetes mellitus type 2, no. (%)</b>                                                                                                                                                                                                                                                             | 37,504 (24.39) | 1,287,018 (22.83) | 1,332,196 (22.74) | 0.04 | 0.04 |
| <b>Dysautonomia, no. (%)</b>                                                                                                                                                                                                                                                                         | 2,216 (1.44)   | 68,723 (1.22)     | 70,957 (1.21)     | 0.02 | 0.02 |
| <b>Hyperlipidemia, no. (%)</b>                                                                                                                                                                                                                                                                       | 41,838 (27.21) | 1,448,706 (25.70) | 1,507,041 (25.72) | 0.03 | 0.03 |
| <b>Hypertension, no. (%)</b>                                                                                                                                                                                                                                                                         | 40,522 (26.35) | 1,485,520 (26.35) | 1,538,388 (26.26) | 0.00 | 0.00 |
| <p>*. Area Deprivation Index is a measure of socioeconomic disadvantage, with a range from low to high disadvantage of 0 to 100.<br/> †. Data collected within one year before cohort enrollment<br/> std, standard deviation; BMI, body mass index; eGFR, estimated glomerular filtration rate.</p> |                |                   |                   |      |      |

**Supplementary Table 3. Risks and 12-month burdens of incident post-acute COVID-19 cardiovascular outcomes compared to contemporary control**

| Outcome*                          | Hazard Ratio (95% CI) <sup>†</sup> | COVID-19 burden per 1000 persons at 12 months (95% CI) <sup>†</sup> | Contemporary control burden per 1000 persons at 12 months (95% CI) <sup>†</sup> | Absolute burden difference per 1000 persons at 12 months (95% CI) <sup>†</sup> |
|-----------------------------------|------------------------------------|---------------------------------------------------------------------|---------------------------------------------------------------------------------|--------------------------------------------------------------------------------|
|                                   | COVID-19 vs Contemporary control   |                                                                     |                                                                                 |                                                                                |
| <b>Cerebrovascular</b>            | 1.53 (1.45, 1.61)                  | 15.95 (15.13, 16.83)                                                | 10.48 (10.39, 10.56)                                                            | 5.48 (4.65, 6.35)                                                              |
| Stroke                            | 1.52 (1.43, 1.62)                  | 11.80 (11.08, 12.56)                                                | 7.77 (7.69, 7.84)                                                               | 4.03 (3.32, 4.79)                                                              |
| TIA                               | 1.49 (1.37, 1.62)                  | 5.62 (5.16, 6.12)                                                   | 3.78 (3.73, 3.83)                                                               | 1.84 (1.38, 2.34)                                                              |
| <b>Dysrhythmia</b>                | 1.69 (1.64, 1.75)                  | 49.37 (47.82, 50.97)                                                | 29.51 (29.37, 29.65)                                                            | 19.86 (18.31, 21.46)                                                           |
| Atrial fibrillation               | 1.71 (1.64, 1.79)                  | 25.99 (24.86, 27.16)                                                | 15.25 (15.15, 15.35)                                                            | 10.74 (9.61, 11.91)                                                            |
| Sinus tachycardia                 | 1.84 (1.74, 1.95)                  | 12.68 (11.97, 13.43)                                                | 6.90 (6.83, 6.97)                                                               | 5.78 (5.07, 6.53)                                                              |
| Sinus bradycardia                 | 1.53 (1.45, 1.62)                  | 13.35 (12.63, 14.11)                                                | 8.73 (8.65, 8.81)                                                               | 4.62 (3.90, 5.38)                                                              |
| Ventricular arrhythmia            | 1.84 (1.72, 1.98)                  | 9.17 (8.55, 9.83)                                                   | 4.98 (4.93, 5.04)                                                               | 4.18 (3.56, 4.85)                                                              |
| Atrial flutter                    | 1.80 (1.66, 1.96)                  | 6.98 (6.43, 7.57)                                                   | 3.88 (3.83, 3.93)                                                               | 3.10 (2.55, 3.69)                                                              |
| <b>Inflammatory heart disease</b> | 2.02 (1.77, 2.30)                  | 2.44 (2.14, 2.78)                                                   | 1.21 (1.18, 1.24)                                                               | 1.23 (0.93, 1.57)                                                              |
| Pericarditis                      | 1.85 (1.61, 2.13)                  | 2.13 (1.85, 2.45)                                                   | 1.15 (1.12, 1.18)                                                               | 0.98 (0.70, 1.30)                                                              |
| Myocarditis                       | 5.38 (3.80, 7.59)                  | 0.38 (0.27, 0.53)                                                   | 0.07 (0.06, 0.08)                                                               | 0.31 (0.20, 0.46)                                                              |
| <b>Ischemic heart disease</b>     | 1.66 (1.52, 1.80)                  | 18.47 (16.99, 20.07)                                                | 11.19 (11.10, 11.28)                                                            | 7.28 (5.80, 8.88)                                                              |
| Acute coronary disease            | 1.72 (1.56, 1.90)                  | 12.82 (11.60, 14.16)                                                | 7.46 (7.39, 7.54)                                                               | 5.35 (4.13, 6.70)                                                              |
| Myocardial infarction             | 1.63 (1.51, 1.75)                  | 7.59 (7.05, 8.17)                                                   | 4.67 (4.62, 4.73)                                                               | 2.91 (2.38, 3.49)                                                              |
| Ischemic cardiomyopathy           | 1.75 (1.44, 2.13)                  | 5.47 (4.50, 6.64)                                                   | 3.13 (3.08, 3.18)                                                               | 2.34 (1.37, 3.51)                                                              |
| Angina                            | 1.52 (1.42, 1.64)                  | 7.28 (6.78, 7.81)                                                   | 4.78 (4.73, 4.84)                                                               | 2.50 (2.00, 3.03)                                                              |
| <b>Other cardiac disorders</b>    | 1.72 (1.65, 1.79)                  | 30.67 (29.48, 31.90)                                                | 17.94 (17.83, 18.05)                                                            | 12.72 (11.54, 13.96)                                                           |
| Heart failure                     | 1.72 (1.65, 1.80)                  | 27.92 (26.79, 29.10)                                                | 16.31 (16.21, 16.42)                                                            | 11.61 (10.47, 12.78)                                                           |
| Non-ischemic cardiomyopathy       | 1.62 (1.52, 1.73)                  | 9.32 (8.72, 9.96)                                                   | 5.75 (5.69, 5.81)                                                               | 3.56 (2.97, 4.20)                                                              |
| Cardiac arrest                    | 2.45 (2.08, 2.89)                  | 1.20 (1.02, 1.42)                                                   | 0.49 (0.47, 0.51)                                                               | 0.71 (0.53, 0.93)                                                              |
| Cardiogenic shock                 | 2.43 (1.86, 3.16)                  | 0.87 (0.66, 1.13)                                                   | 0.36 (0.34, 0.37)                                                               | 0.51 (0.31, 0.77)                                                              |
| <b>Thrombotic disorders</b>       | 2.39 (2.27, 2.51)                  | 17.07 (16.25, 17.94)                                                | 7.19 (7.12, 7.26)                                                               | 9.88 (9.05, 10.74)                                                             |
| Pulmonary embolism                | 2.93 (2.73, 3.15)                  | 8.31 (7.75, 8.92)                                                   | 2.84 (2.80, 2.89)                                                               | 5.47 (4.90, 6.08)                                                              |
| Deep vein thrombosis              | 2.09 (1.94, 2.24)                  | 8.04 (7.48, 8.65)                                                   | 3.86 (3.81, 3.91)                                                               | 4.18 (3.62, 4.79)                                                              |
| Superficial vein thrombosis       | 1.95 (1.80, 2.12)                  | 5.37 (4.95, 5.82)                                                   | 2.76 (2.71, 2.80)                                                               | 2.61 (2.20, 3.07)                                                              |



|                                                                                                                                                                                                                                                                                                                                                             |                   |                         |                      |                      |
|-------------------------------------------------------------------------------------------------------------------------------------------------------------------------------------------------------------------------------------------------------------------------------------------------------------------------------------------------------------|-------------------|-------------------------|----------------------|----------------------|
| <b>MACE</b>                                                                                                                                                                                                                                                                                                                                                 | 1.55 (1.50, 1.60) | 67.67 (65.73, 69.67)    | 44.19 (44.02, 44.36) | 23.48 (21.54, 25.48) |
| <b>Any cardiovascular outcome</b>                                                                                                                                                                                                                                                                                                                           | 1.63 (1.59, 1.68) | 121.60 (118.52, 124.76) | 76.31 (76.08, 76.54) | 45.29 (42.22, 48.45) |
| <p>*. Outcomes were ascertained from day 30 after the initial positive COVID-19 test result until end of follow up<br/> †. Adjustment through inverse probability weighting using predefined and algorithmically selected high-dimensional variables.<br/> CI, confidence interval; TIA, transient ischemic attack; MACE, major adverse cardiac events.</p> |                   |                         |                      |                      |

**Supplementary Table 4. Subgroup analyses of the risks of incident post-acute COVID-19 composite cardiovascular outcomes compared to contemporary control**

| Risk factors               | Hazard ratio (95% CI)* - COVID-19 vs Contemporary control |                      |                            |                        |                         |                      |                      |                            |
|----------------------------|-----------------------------------------------------------|----------------------|----------------------------|------------------------|-------------------------|----------------------|----------------------|----------------------------|
|                            | Cerebro-vascular                                          | Dysrhythmia          | Inflammatory heart disease | Ischemic heart disease | Other cardiac disorders | Thrombotic disorders | MACE                 | Any cardiovascular outcome |
| <b>Age</b>                 |                                                           |                      |                            |                        |                         |                      |                      |                            |
| ≤65                        | 1.44<br>(1.29, 1.60)                                      | 1.68<br>(1.59, 1.77) | 1.86<br>(1.40, 2.45)       | 1.66<br>(1.45, 1.91)   | 1.55<br>(1.43, 1.69)    | 2.18<br>(1.99, 2.37) | 1.32<br>(1.23, 1.42) | 1.58<br>(1.52, 1.64)       |
| >65                        | 1.53<br>(1.44, 1.63)                                      | 1.68<br>(1.58, 1.79) | 2.07<br>(1.79, 2.40)       | 1.60<br>(1.51, 1.71)   | 1.77<br>(1.69, 1.86)    | 2.50<br>(2.35, 2.66) | 1.60<br>(1.53, 1.66) | 1.68<br>(1.61, 1.75)       |
| <b>Race</b>                |                                                           |                      |                            |                        |                         |                      |                      |                            |
| White                      | 1.56<br>(1.46, 1.67)                                      | 1.68<br>(1.62, 1.75) | 2.18<br>(1.86, 2.55)       | 1.56<br>(1.47, 1.65)   | 1.71<br>(1.63, 1.79)    | 2.29<br>(2.16, 2.44) | 1.54<br>(1.49, 1.60) | 1.64<br>(1.59, 1.69)       |
| Black                      | 1.50<br>(1.35, 1.66)                                      | 1.67<br>(1.57, 1.79) | 1.69<br>(1.36, 2.12)       | 2.00<br>(1.34, 2.99)   | 1.79<br>(1.65, 1.93)    | 2.41<br>(2.2, 2.63)  | 1.67<br>(1.56, 1.79) | 1.68<br>(1.60, 1.76)       |
| <b>Sex</b>                 |                                                           |                      |                            |                        |                         |                      |                      |                            |
| Male                       | 1.51<br>(1.43, 1.60)                                      | 1.71<br>(1.65, 1.77) | 2.03<br>(1.77, 2.34)       | 1.63<br>(1.51, 1.75)   | 1.75<br>(1.68, 1.83)    | 2.41<br>(2.29, 2.53) | 1.50<br>(1.46, 1.55) | 1.66<br>(1.61, 1.71)       |
| Female                     | 1.15<br>(0.91, 1.45)                                      | 1.48<br>(1.32, 1.66) | 1.87<br>(1.31, 2.67)       | 1.38<br>(1.11, 1.72)   | 1.34<br>(1.10, 1.64)    | 1.63<br>(1.32, 2.02) | 1.39<br>(1.15, 1.68) | 1.46<br>(1.32, 1.61)       |
| <b>Obesity<sup>†</sup></b> |                                                           |                      |                            |                        |                         |                      |                      |                            |
| No                         | 1.56<br>(1.45, 1.68)                                      | 1.78<br>(1.69, 1.87) | 2.25<br>(1.85, 2.74)       | 1.70<br>(1.52, 1.90)   | 1.91<br>(1.80, 2.03)    | 2.51<br>(2.34, 2.70) | 1.56<br>(1.5, 1.62)  | 1.73<br>(1.67, 1.80)       |
| Yes                        | 1.55<br>(1.42, 1.68)                                      | 1.54<br>(1.48, 1.61) | 1.76<br>(1.49, 2.08)       | 1.50<br>(1.4, 1.61)    | 1.57<br>(1.49, 1.65)    | 2.21<br>(2.05, 2.38) | 1.44<br>(1.38, 1.51) | 1.54<br>(1.49, 1.59)       |
| <b>Smoking</b>             |                                                           |                      |                            |                        |                         |                      |                      |                            |
| No                         | 1.43<br>(1.36, 1.50)                                      | 1.51<br>(1.47, 1.56) | 1.86<br>(1.65, 2.11)       | 1.57<br>(1.50, 1.65)   | 1.56<br>(1.51, 1.62)    | 2.05<br>(1.96, 2.15) | 1.48<br>(1.43, 1.52) | 1.55<br>(1.52, 1.58)       |
| Yes                        | 1.61<br>(1.42, 1.83)                                      | 1.73<br>(1.59, 1.89) | 1.97<br>(1.41, 2.74)       | 1.61<br>(1.39, 1.86)   | 1.58<br>(1.42, 1.75)    | 2.09<br>(1.83, 2.38) | 1.51<br>(1.41, 1.63) | 1.61<br>(1.51, 1.70)       |

| <b>Hypertension</b>                                                                                                                                                                                                                                                                                                                                                                                                                             |                      |                      |                      |                      |                      |                      |                      |                      |
|-------------------------------------------------------------------------------------------------------------------------------------------------------------------------------------------------------------------------------------------------------------------------------------------------------------------------------------------------------------------------------------------------------------------------------------------------|----------------------|----------------------|----------------------|----------------------|----------------------|----------------------|----------------------|----------------------|
| No                                                                                                                                                                                                                                                                                                                                                                                                                                              | 1.59<br>(1.49, 1.71) | 1.71<br>(1.64, 1.78) | 2.11<br>(1.78, 2.49) | 1.64<br>(1.39, 1.93) | 1.74<br>(1.65, 1.83) | 2.44<br>(2.30, 2.59) | 1.57<br>(1.51, 1.63) | 1.66<br>(1.61, 1.72) |
| Yes                                                                                                                                                                                                                                                                                                                                                                                                                                             | 1.49<br>(1.36, 1.62) | 1.58<br>(1.50, 1.67) | 1.98<br>(1.60, 2.45) | 1.76<br>(1.59, 1.95) | 1.71<br>(1.60, 1.83) | 2.22<br>(2.03, 2.43) | 1.54<br>(1.46, 1.62) | 1.57<br>(1.51, 1.64) |
| <b>Diabetes</b>                                                                                                                                                                                                                                                                                                                                                                                                                                 |                      |                      |                      |                      |                      |                      |                      |                      |
| No                                                                                                                                                                                                                                                                                                                                                                                                                                              | 1.65<br>(1.53, 1.77) | 1.74<br>(1.67, 1.81) | 1.98<br>(1.65, 2.39) | 1.81<br>(1.52, 2.15) | 1.86<br>(1.76, 1.97) | 2.48<br>(2.32, 2.65) | 1.60<br>(1.53, 1.66) | 1.67<br>(1.62, 1.73) |
| Yes                                                                                                                                                                                                                                                                                                                                                                                                                                             | 1.40<br>(1.31, 1.51) | 1.51<br>(1.43, 1.60) | 1.87<br>(1.58, 2.21) | 1.44<br>(1.35, 1.53) | 1.51<br>(1.44, 1.59) | 2.14<br>(1.99, 2.30) | 1.42<br>(1.36, 1.47) | 1.52<br>(1.44, 1.60) |
| <b>Chronic kidney disease<sup>‡</sup></b>                                                                                                                                                                                                                                                                                                                                                                                                       |                      |                      |                      |                      |                      |                      |                      |                      |
| No                                                                                                                                                                                                                                                                                                                                                                                                                                              | 1.61<br>(1.50, 1.72) | 1.71<br>(1.64, 1.79) | 2.05<br>(1.73, 2.43) | 1.71<br>(1.47, 2.00) | 1.77<br>(1.68, 1.86) | 2.40<br>(2.26, 2.55) | 1.56<br>(1.50, 1.63) | 1.66<br>(1.60, 1.71) |
| Yes                                                                                                                                                                                                                                                                                                                                                                                                                                             | 1.43<br>(1.31, 1.57) | 1.54<br>(1.46, 1.64) | 1.87<br>(1.55, 2.24) | 1.54<br>(1.41, 1.68) | 1.63<br>(1.53, 1.74) | 2.29<br>(2.10, 2.51) | 1.48<br>(1.41, 1.56) | 1.55<br>(1.44, 1.67) |
| <b>Hyperlipidemia</b>                                                                                                                                                                                                                                                                                                                                                                                                                           |                      |                      |                      |                      |                      |                      |                      |                      |
| No                                                                                                                                                                                                                                                                                                                                                                                                                                              | 1.66<br>(1.55, 1.77) | 1.68<br>(1.61, 1.75) | 2.16<br>(1.85, 2.53) | 1.69<br>(1.59, 1.79) | 1.86<br>(1.77, 1.95) | 2.48<br>(2.33, 2.64) | 1.64<br>(1.58, 1.70) | 1.69<br>(1.64, 1.74) |
| Yes                                                                                                                                                                                                                                                                                                                                                                                                                                             | 1.41<br>(1.29, 1.53) | 1.59<br>(1.49, 1.68) | 1.56<br>(1.29, 1.89) | 1.54<br>(1.30, 1.81) | 1.41<br>(1.32, 1.50) | 2.19<br>(2.02, 2.38) | 1.34<br>(1.27, 1.41) | 1.49<br>(1.42, 1.56) |
| <b>Cardiovascular disease</b>                                                                                                                                                                                                                                                                                                                                                                                                                   |                      |                      |                      |                      |                      |                      |                      |                      |
| No                                                                                                                                                                                                                                                                                                                                                                                                                                              | 1.49<br>(1.40, 1.59) | 1.71<br>(1.62, 1.81) | 2.02<br>(1.69, 2.42) | 1.57<br>(1.48, 1.67) | 1.72<br>(1.63, 1.80) | 2.42<br>(2.28, 2.57) | 1.53<br>(1.48, 1.59) | 1.63<br>(1.59, 1.68) |
| Yes                                                                                                                                                                                                                                                                                                                                                                                                                                             | 1.35<br>(1.23, 1.48) | 1.35<br>(1.27, 1.43) | 1.73<br>(1.47, 2.05) | 1.35<br>(1.26, 1.45) | 1.50<br>(1.41, 1.60) | 1.80<br>(1.65, 1.97) | 1.34<br>(1.28, 1.40) | NA                   |
| <p>*. Adjustment through inverse probability weighting using predefined and algorithmically selected high-dimensional variables.<br/> †. Obesity was defined based on baseline BMI&gt;30kg/m<sup>2</sup><br/> ‡. Chronic kidney disease was defined based on baseline outpatient estimated Glomerular Filtration Rate&lt; 60 mL/min/1.73 m<sup>2</sup><br/> CI, confidence interval; MACE, major adverse cardiac events, NA, not applicable</p> |                      |                      |                      |                      |                      |                      |                      |                      |

**Supplementary Table 5. Risks and 12-month burdens of incident post-acute COVID-19 cardiovascular outcomes in participants without any history of cardiovascular outcomes prior to COVID-19 exposure compared to contemporary control**

| Outcome*                          | Hazard Ratio (95% CI) <sup>†</sup> | COVID-19 burden per 1000 persons at 12 months (95% CI) <sup>†</sup> | Contemporary control burden per 1000 persons at 12 months (95% CI) <sup>†</sup> | Absolute burden difference per 1000 persons at 12 months (95% CI) <sup>†</sup> |
|-----------------------------------|------------------------------------|---------------------------------------------------------------------|---------------------------------------------------------------------------------|--------------------------------------------------------------------------------|
|                                   | COVID-19 vs Contemporary control   |                                                                     |                                                                                 |                                                                                |
| <b>Cerebrovascular</b>            | 1.49 (1.40, 1.59)                  | 13.45 (12.61, 14.34)                                                | 9.03 (8.95, 9.11)                                                               | 4.42 (3.58, 5.31)                                                              |
| Stroke                            | 1.48 (1.37, 1.59)                  | 9.78 (9.08, 10.55)                                                  | 6.64 (6.57, 6.71)                                                               | 3.14 (2.43, 3.90)                                                              |
| TIA                               | 1.46 (1.31, 1.63)                  | 4.49 (4.03, 5.00)                                                   | 3.07 (3.02, 3.12)                                                               | 1.42 (0.96, 1.93)                                                              |
| <b>Dysrhythmia</b>                | 1.71 (1.62, 1.81)                  | 43.73 (41.42, 46.17)                                                | 25.76 (25.63, 25.90)                                                            | 17.97 (15.66, 20.41)                                                           |
| Atrial fibrillation               | 1.68 (1.58, 1.77)                  | 20.21 (19.12, 21.37)                                                | 12.11 (12.01, 12.20)                                                            | 8.11 (7.01, 9.26)                                                              |
| Sinus tachycardia                 | 1.84 (1.72, 1.97)                  | 10.83 (10.12, 11.60)                                                | 5.90 (5.83, 5.97)                                                               | 4.93 (4.21, 5.70)                                                              |
| Sinus bradycardia                 | 1.58 (1.47, 1.69)                  | 11.03 (10.29, 11.83)                                                | 7.02 (6.94, 7.09)                                                               | 4.02 (3.28, 4.81)                                                              |
| Ventricular arrhythmia            | 2.14 (1.61, 2.84)                  | 6.91 (5.21, 9.16)                                                   | 3.23 (3.18, 3.28)                                                               | 3.68 (1.98, 5.93)                                                              |
| Atrial flutter                    | 1.93 (1.71, 2.17)                  | 4.46 (3.97, 5.03)                                                   | 2.32 (2.28, 2.36)                                                               | 2.15 (1.65, 2.71)                                                              |
| <b>Inflammatory heart disease</b> | 2.02 (1.69, 2.42)                  | 1.71 (1.43, 2.05)                                                   | 0.85 (0.82, 0.87)                                                               | 0.87 (0.58, 1.20)                                                              |
| Pericarditis                      | 1.85 (1.52, 2.25)                  | 1.48 (1.21, 1.79)                                                   | 0.80 (0.77, 0.82)                                                               | 0.68 (0.41, 1.00)                                                              |
| Myocarditis                       | 5.74 (3.84, 8.59)                  | 0.30 (0.20, 0.44)                                                   | 0.05 (0.05, 0.06)                                                               | 0.25 (0.15, 0.39)                                                              |
| <b>Ischemic heart disease</b>     | 1.57 (1.48, 1.67)                  | 12.92 (12.16, 13.73)                                                | 8.26 (8.18, 8.34)                                                               | 4.66 (3.91, 5.47)                                                              |
| Acute coronary disease            | 1.62 (1.49, 1.76)                  | 7.92 (7.30, 8.60)                                                   | 4.90 (4.84, 4.96)                                                               | 3.02 (2.40, 3.69)                                                              |
| Myocardial infarction             | 1.51 (1.37, 1.67)                  | 5.12 (4.63, 5.67)                                                   | 3.39 (3.34, 3.44)                                                               | 1.73 (1.24, 2.28)                                                              |
| Ischemic cardiomyopathy           | 1.67 (1.42, 1.95)                  | 2.39 (2.04, 2.79)                                                   | 1.43 (1.40, 1.46)                                                               | 0.95 (0.60, 1.36)                                                              |
| Angina                            | 1.51 (1.39, 1.64)                  | 5.82 (5.36, 6.32)                                                   | 3.86 (3.81, 3.91)                                                               | 1.96 (1.50, 2.46)                                                              |
| <b>Other cardiac disorders</b>    | 1.72 (1.63, 1.80)                  | 24.45 (23.26, 25.71)                                                | 14.33 (14.22, 14.43)                                                            | 10.12 (8.93, 11.38)                                                            |
| Heart failure                     | 1.74 (1.65, 1.84)                  | 21.41 (20.27, 22.61)                                                | 12.35 (12.25, 12.45)                                                            | 9.06 (7.92, 10.26)                                                             |
| Non-ischemic cardiomyopathy       | 1.60 (1.44, 1.77)                  | 5.21 (4.71, 5.78)                                                   | 3.26 (3.21, 3.31)                                                               | 1.95 (1.44, 2.51)                                                              |
| Cardiac arrest                    | 2.73 (1.86, 4.01)                  | 0.80 (0.54, 1.17)                                                   | 0.29 (0.28, 0.31)                                                               | 0.51 (0.25, 0.88)                                                              |
| Cardiogenic shock                 | 2.00 (1.35, 2.96)                  | 0.30 (0.20, 0.44)                                                   | 0.15 (0.14, 0.16)                                                               | 0.15 (0.05, 0.29)                                                              |
| <b>Thrombotic disorders</b>       | 2.42 (2.28, 2.57)                  | 14.97 (14.11, 15.87)                                                | 6.21 (6.14, 6.27)                                                               | 8.76 (7.91, 9.66)                                                              |
| Pulmonary embolism                | 3.11 (2.86, 3.39)                  | 7.24 (6.65, 7.87)                                                   | 2.33 (2.29, 2.37)                                                               | 4.91 (4.32, 5.54)                                                              |
| Deep vein thrombosis              | 2.06 (1.89, 2.25)                  | 6.60 (6.04, 7.21)                                                   | 3.21 (3.16, 3.26)                                                               | 3.39 (2.83, 4.01)                                                              |
| Superficial vein thrombosis       | 2.13 (1.91, 2.37)                  | 3.97 (3.57, 4.42)                                                   | 1.87 (1.83, 1.91)                                                               | 2.11 (1.70, 2.55)                                                              |
| <b>MACE</b>                       | 1.53 (1.48, 1.59)                  | 57.25 (55.19, 59.39)                                                | 37.72 (37.55, 37.88)                                                            | 19.54 (17.47, 21.68)                                                           |

|                                                                                                                                                                                                                                                                                                                                                                 |                   |                         |                      |                      |
|-----------------------------------------------------------------------------------------------------------------------------------------------------------------------------------------------------------------------------------------------------------------------------------------------------------------------------------------------------------------|-------------------|-------------------------|----------------------|----------------------|
| <b>Any cardiovascular outcome</b>                                                                                                                                                                                                                                                                                                                               | 1.63 (1.59, 1.68) | 121.60 (118.52, 124.76) | 76.31 (76.08, 76.54) | 45.29 (42.22, 48.45) |
| <p>*. Outcomes were ascertained from day 30 after the initial positive COVID-19 test result until end of follow up</p> <p>†. Adjustment through inverse probability weighting using predefined and algorithmically selected high-dimensional variables.</p> <p>CI, confidence interval; TIA, transient ischemic attack; MACE, major adverse cardiac events.</p> |                   |                         |                      |                      |

**Supplementary Table 6. Demographic and health characteristics of the COVID-19 and contemporary cohorts by care setting of the acute infection before weighting**

| <b>Baseline Characteristics</b>                | <b>Non-hospitalized (N=131,612)</b> | <b>Hospitalized (N=16,760)</b> | <b>Admitted to intensive care (N=5,388)</b> | <b>Contemporary control (N=5,637,647)</b> | <b>Absolute standardized difference - Non-hospitalized and Contemporary control</b> | <b>Absolute standardized difference - Hospitalized and Contemporary control</b> | <b>Absolute standardized difference - Admitted to intensive care and Contemporary control</b> |
|------------------------------------------------|-------------------------------------|--------------------------------|---------------------------------------------|-------------------------------------------|-------------------------------------------------------------------------------------|---------------------------------------------------------------------------------|-----------------------------------------------------------------------------------------------|
| <b>Age, mean (std), yr</b>                     | 60.23 (15.72)                       | 68.38 (13.38)                  | 68.95 (12.03)                               | 63.46 (16.23)                             | 0.20                                                                                | 0.33                                                                            | 0.38                                                                                          |
| <b>Race, no. (%)</b>                           |                                     |                                |                                             |                                           |                                                                                     |                                                                                 |                                                                                               |
| White                                          | 95,035 (72.21)                      | 10,585 (63.16)                 | 3,358 (62.32)                               | 4,328,756 (76.78)                         | 0.11                                                                                | 0.30                                                                            | 0.32                                                                                          |
| Black                                          | 30,166 (22.92)                      | 5,228 (31.19)                  | 1,719 (31.90)                               | 1,042,153 (18.49)                         | 0.11                                                                                | 0.30                                                                            | 0.31                                                                                          |
| Other                                          | 6,411 (4.87)                        | 947 (5.65)                     | 311 (5.77)                                  | 266,738 (4.73)                            | 0.01                                                                                | 0.04                                                                            | 0.05                                                                                          |
| <b>Sex, no. (%)</b>                            |                                     |                                |                                             |                                           |                                                                                     |                                                                                 |                                                                                               |
| Male                                           | 116,032 (88.16)                     | 15,774 (94.12)                 | 5,106 (94.77)                               | 5,091,519 (90.31)                         | 0.07                                                                                | 0.14                                                                            | 0.17                                                                                          |
| Female                                         | 15,580 (11.84)                      | 986 (5.88)                     | 282 (5.23)                                  | 546,128 (9.69)                            | 0.07                                                                                | 0.14                                                                            | 0.17                                                                                          |
| <b>BMI category, no. (%), kg/m<sup>2</sup></b> |                                     |                                |                                             |                                           |                                                                                     |                                                                                 |                                                                                               |
| BMI ≤ 25                                       | 17,581 (13.36)                      | 3,571 (21.31)                  | 1,040 (19.30)                               | 1,099,292 (19.50)                         | 0.17                                                                                | 0.04                                                                            | 0.00                                                                                          |
| 25 < BMI ≤ 30                                  | 42,041 (31.94)                      | 5,134 (30.63)                  | 1,611 (29.90)                               | 2,158,693 (38.29)                         | 0.13                                                                                | 0.16                                                                            | 0.18                                                                                          |
| BMI > 30                                       | 71,990 (54.70)                      | 8,055 (48.06)                  | 2,737 (50.80)                               | 2,379,662 (42.21)                         | 0.25                                                                                | 0.12                                                                            | 0.17                                                                                          |
| <b>Smoking status, no. (%)</b>                 |                                     |                                |                                             |                                           |                                                                                     |                                                                                 |                                                                                               |
| Never                                          | 59,811 (45.45)                      | 7,140 (42.60)                  | 2,176 (40.39)                               | 2,398,958 (42.55)                         | 0.06                                                                                | 0.00                                                                            | 0.04                                                                                          |
| Former                                         | 51,871 (39.41)                      | 6,844 (40.84)                  | 2,369 (43.97)                               | 2,031,298 (36.03)                         | 0.07                                                                                | 0.10                                                                            | 0.16                                                                                          |
| Current                                        | 19,930 (15.14)                      | 2,776 (16.56)                  | 843 (15.65)                                 | 1,207,391 (21.42)                         | 0.16                                                                                | 0.12                                                                            | 0.15                                                                                          |
| <b>Area Deprivation Index*, mean (std)</b>     | 55.63 (18.55)                       | 53.13 (18.70)                  | 54.62 (18.63)                               | 54.65 (19.05)                             | 0.05                                                                                | 0.08                                                                            | 0.00                                                                                          |
| <b>Clinical Characteristics</b>                |                                     |                                |                                             |                                           |                                                                                     |                                                                                 |                                                                                               |
| <b>Outpatient encounter†, no. (%)</b>          |                                     |                                |                                             |                                           |                                                                                     |                                                                                 |                                                                                               |
| Zero                                           | 3,909 (2.97)                        | 185 (1.10)                     | 62 (1.15)                                   | 666,096 (11.82)                           | 0.34                                                                                | 0.45                                                                            | 0.44                                                                                          |
| One                                            | 24,764 (18.82)                      | 1,311 (7.82)                   | 408 (7.57)                                  | 1,784,211 (31.65)                         | 0.30                                                                                | 0.63                                                                            | 0.64                                                                                          |

|                                                   |                 |                |                |                   |      |      |      |
|---------------------------------------------------|-----------------|----------------|----------------|-------------------|------|------|------|
| Two or more                                       | 102,939 (78.21) | 15,264 (91.07) | 4,918 (91.28)  | 3,187,340 (56.54) | 0.48 | 0.85 | 0.86 |
| <b>Long-term care, no. (%)</b>                    | 3,884 (2.95)    | 1,726 (10.30)  | 497 (9.22)     | 33611 (0.60)      | 0.18 | 0.44 | 0.41 |
| <b>eGFR, mean (std), ml/min/1.73m<sup>2</sup></b> | 79.47 (21.31)   | 68.26 (26.13)  | 65.07 (26.79)  | 78.59 (20.15)     | 0.04 | 0.44 | 0.57 |
| <b>Systolic blood pressure, mean (std), mmHg</b>  | 132.35 (11.69)  | 134.38 (11.83) | 134.57 (12.14) | 132.65 (12.29)    | 0.02 | 0.14 | 0.16 |
| <b>Diastolic blood pressure, mean (std), mmHg</b> | 78.54 (7.37)    | 77.06 (7.46)   | 76.99 (7.73)   | 77.77 (7.54)      | 0.10 | 0.10 | 0.10 |
| <b>Cancer, no. (%)</b>                            | 9,315 (7.08)    | 2,411 (14.39)  | 798 (14.81)    | 344,668 (6.11)    | 0.04 | 0.28 | 0.29 |
| <b>Chronic kidney disease, no. (%)</b>            | 21,928 (16.66)  | 5,946 (35.48)  | 2,135 (39.63)  | 940,048 (16.67)   | 0.00 | 0.44 | 0.53 |
| <b>Chronic lung disease, no. (%)</b>              | 17,740 (13.48)  | 4,208 (25.11)  | 1,521 (28.23)  | 609,531 (10.81)   | 0.08 | 0.38 | 0.45 |
| <b>Dementia, no. (%)</b>                          | 6,344 (4.82)    | 2,472 (14.75)  | 681 (12.64)    | 172,128 (3.05)    | 0.09 | 0.42 | 0.36 |
| <b>Diabetes mellitus type 2, no. (%)</b>          | 39,029 (29.66)  | 7,689 (45.88)  | 2,689 (49.91)  | 1,272,500 (22.57) | 0.16 | 0.51 | 0.59 |
| <b>Dysautonomia, no. (%)</b>                      | 2,120 (1.61)    | 525 (3.13)     | 167 (3.10)     | 67,704 (1.20)     | 0.03 | 0.13 | 0.13 |
| <b>Hyperlipidemia, no. (%)</b>                    | 44,815 (34.05)  | 5,535 (33.03)  | 1,877 (34.84)  | 1,435,909 (25.47) | 0.19 | 0.17 | 0.21 |
| <b>Hypertension, no. (%)</b>                      | 34,060 (25.88)  | 5,290 (31.56)  | 1,710 (31.74)  | 1,484,884 (26.34) | 0.01 | 0.12 | 0.12 |

\*. Area Deprivation Index is a measure of socioeconomic disadvantage, with a range from low to high disadvantage of 0 to 100.

†. Data collected within one year before cohort enrollment

std, standard deviation; BMI, body mass index; eGFR, estimated glomerular filtration rate.

**Supplementary Table 7. Demographic and health characteristics of the COVID-19 and contemporary cohorts by care setting of the acute infection after weighting**

| <b>Baseline Characteristics</b>                  | <b>Non-hospitalized (N=131,612)</b> | <b>Hospitalized (N=16,760)</b> | <b>Admitted to intensive care (N=5,388)</b> | <b>Contemporary control (N=5,637,647)</b> | <b>Absolute standardized difference - Non-hospitalized and Contemporary control</b> | <b>Absolute standardized difference - Hospitalized and Contemporary control</b> | <b>Absolute standardized difference - Admitted to intensive care and Contemporary control</b> |
|--------------------------------------------------|-------------------------------------|--------------------------------|---------------------------------------------|-------------------------------------------|-------------------------------------------------------------------------------------|---------------------------------------------------------------------------------|-----------------------------------------------------------------------------------------------|
| <b>Age, mean (std), yr</b>                       | 63.06 (16.29)                       | 63.21 (15.88)                  | 63.46 (16.07)                               | 63.41 (16.22)                             | 0.02                                                                                | 0.01                                                                            | 0.00                                                                                          |
| <b>Race, no. (%)</b>                             |                                     |                                |                                             |                                           |                                                                                     |                                                                                 |                                                                                               |
| White                                            | 99,846 (75.86)                      | 12,406 (74.02)                 | 3,951 (73.33)                               | 4,320,129 (76.63)                         | 0.02                                                                                | 0.06                                                                            | 0.08                                                                                          |
| Black                                            | 25,339 (19.25)                      | 3,512 (20.96)                  | 1,073 (19.92)                               | 1,050,406 (18.63)                         | 0.02                                                                                | 0.06                                                                            | 0.03                                                                                          |
| Other                                            | 6,427 (4.88)                        | 842 (5.02)                     | 364 (6.75)                                  | 267,112 (4.74)                            | 0.01                                                                                | 0.01                                                                            | 0.09                                                                                          |
| <b>Sex, no. (%)</b>                              |                                     |                                |                                             |                                           |                                                                                     |                                                                                 |                                                                                               |
| Male                                             | 118,151 (89.77)                     | 15,285 (91.20)                 | 4,982 (92.46)                               | 5,089,555 (90.28)                         | 0.02                                                                                | 0.03                                                                            | 0.08                                                                                          |
| Female                                           | 13,461 (10.23)                      | 1475 (8.80)                    | 406 (7.54)                                  | 548,092 (9.72)                            | 0.02                                                                                | 0.03                                                                            | 0.08                                                                                          |
| <b>BMI category, no. (%), kg/m<sup>2</sup></b>   |                                     |                                |                                             |                                           |                                                                                     |                                                                                 |                                                                                               |
| BMI ≤ 25                                         | 25,091 (19.06)                      | 3,299 (19.68)                  | 965 (17.91)                                 | 1,092,407 (19.38)                         | 0.01                                                                                | 0.01                                                                            | 0.04                                                                                          |
| 25 < BMI ≤ 30                                    | 47,358 (35.98)                      | 5,713 (34.09)                  | 1,917 (35.57)                               | 2,149,297 (38.12)                         | 0.04                                                                                | 0.08                                                                            | 0.05                                                                                          |
| BMI > 30                                         | 59,164 (44.95)                      | 7,748 (46.23)                  | 2,506 (46.52)                               | 2,395,944 (42.50)                         | 0.05                                                                                | 0.08                                                                            | 0.08                                                                                          |
| <b>Smoking status, no. (%)</b>                   |                                     |                                |                                             |                                           |                                                                                     |                                                                                 |                                                                                               |
| Never                                            | 54,307 (41.26)                      | 6,714 (40.06)                  | 2,236 (41.50)                               | 2,402,258 (42.61)                         | 0.03                                                                                | 0.05                                                                            | 0.02                                                                                          |
| Former                                           | 48,812 (37.09)                      | 5,972 (35.63)                  | 1,963 (36.43)                               | 2,036,825 (36.13)                         | 0.02                                                                                | 0.01                                                                            | 0.01                                                                                          |
| Current                                          | 28,493 (21.65)                      | 4,073 (24.30)                  | 1,189 (22.07)                               | 1,198,507 (21.26)                         | 0.01                                                                                | 0.07                                                                            | 0.02                                                                                          |
| <b>Area Deprivation Index*, mean (std)</b>       | 54.95 (18.93)                       | 55.04 (19.30)                  | 55.96 (19.24)                               | 54.66 (19.04)                             | 0.01                                                                                | 0.02                                                                            | 0.07                                                                                          |
| <b>Clinical Characteristics</b>                  |                                     |                                |                                             |                                           |                                                                                     |                                                                                 |                                                                                               |
| <b>Outpatient encounter<sup>†</sup>, no. (%)</b> |                                     |                                |                                             |                                           |                                                                                     |                                                                                 |                                                                                               |
| Zero                                             | 15,124 (11.49)                      | 1,664 (9.93)                   | 464 (8.62)                                  | 652,558 (11.58)                           | 0.00                                                                                | 0.05                                                                            | 0.10                                                                                          |
| One                                              | 40,762 (30.97)                      | 5,617 (33.51)                  | 1,910 (35.45)                               | 1,761,990 (31.25)                         | 0.01                                                                                | 0.05                                                                            | 0.09                                                                                          |



|                                                                                                                                |                |                |                |                   |      |      |      |
|--------------------------------------------------------------------------------------------------------------------------------|----------------|----------------|----------------|-------------------|------|------|------|
| Two or more                                                                                                                    | 75,728 (57.54) | 9,479 (56.56)  | 3,014 (55.93)  | 3,223,099 (57.17) | 0.01 | 0.01 | 0.03 |
| <b>Long-term care, no. (%)</b>                                                                                                 | 1,191 (0.91)   | 240 (1.43)     | 87 (1.61)      | 38,674 (0.69)     | 0.02 | 0.07 | 0.09 |
| <b>eGFR, mean (std), ml/min/1.73m<sup>2</sup></b>                                                                              | 78.55 (20.59)  | 77.93 (21.54)  | 77.72 (21.68)  | 78.57 (20.21)     | 0.00 | 0.03 | 0.04 |
| <b>Systolic blood pressure, mean (std), mmHg</b>                                                                               | 132.58 (12.42) | 133.18 (12.41) | 134.03 (12.22) | 132.65 (12.28)    | 0.01 | 0.04 | 0.11 |
| <b>Diastolic blood pressure, mean (std), mmHg</b>                                                                              | 77.82 (7.62)   | 78.22 (7.61)   | 78.30 (7.71)   | 77.79 (7.53)      | 0.00 | 0.06 | 0.07 |
| <b>Cancer, no. (%)</b>                                                                                                         | 8,092 (6.15)   | 1,193 (7.12)   | 370 (6.87)     | 348,350 (6.18)    | 0.00 | 0.04 | 0.03 |
| <b>Chronic kidney disease, no. (%)</b>                                                                                         | 22,753 (17.29) | 3,175 (18.94)  | 1,037 (19.24)  | 944,249 (16.75)   | 0.01 | 0.06 | 0.06 |
| <b>Chronic lung disease, no. (%)</b>                                                                                           | 14,908 (11.33) | 2,071 (12.36)  | 639 (11.87)    | 616,364 (10.93)   | 0.01 | 0.04 | 0.03 |
| <b>Dementia, no. (%)</b>                                                                                                       | 4,445 (3.38)   | 765 (4.56)     | 254 (4.72)     | 176,797 (3.14)    | 0.01 | 0.07 | 0.08 |
| <b>Diabetes mellitus type 2, no. (%)</b>                                                                                       | 30,642 (23.28) | 4,359 (26.01)  | 1,474 (27.35)  | 1,286,737 (22.82) | 0.01 | 0.07 | 0.10 |
| <b>Dysautonomia, no. (%)</b>                                                                                                   | 1,683 (1.28)   | 226 (1.35)     | 81 (1.50)      | 68,667 (1.22)     | 0.01 | 0.01 | 0.02 |
| <b>Hyperlipidemia, no. (%)</b>                                                                                                 | 34,823 (26.46) | 4,454 (26.58)  | 1,447 (26.86)  | 1,448,593 (25.70) | 0.02 | 0.02 | 0.03 |
| <b>Hypertension, no. (%)</b>                                                                                                   | 35,235 (26.77) | 4,885 (29.15)  | 1,663 (30.87)  | 1,485,407 (26.35) | 0.01 | 0.06 | 0.10 |
| * . Area Deprivation Index is a measure of socioeconomic disadvantage, with a range from low to high disadvantage of 0 to 100. |                |                |                |                   |      |      |      |
| †. Data collected within one year before cohort enrollment                                                                     |                |                |                |                   |      |      |      |
| std, standard deviation; BMI, body mass index; eGFR, estimated glomerular filtration rate.                                     |                |                |                |                   |      |      |      |

**Supplementary Table 8. Risks and 12-month burdens of incident post-acute COVID-19 cardiovascular outcomes by care setting of the acute infection compared to contemporary control**

| Outcome*               | Care setting†              | Hazard ratio (95% CI) ‡ | COVID-19 burden per 1000 persons at 12 months (95% CI) ‡ | Contemporary control burden per 1000 persons at 12 months (95% CI) ‡ | Burden difference per 1000 persons at 12 months (95% CI) ‡ |
|------------------------|----------------------------|-------------------------|----------------------------------------------------------|----------------------------------------------------------------------|------------------------------------------------------------|
| <b>Cerebrovascular</b> | Non-hospitalized           | 1.30 (1.22, 1.37)       | 13.79 (13.03, 14.60)                                     | 10.67<br>(10.58, 10.75)                                              | 3.13 (2.36, 3.93)                                          |
|                        | Hospitalized               | 2.92 (2.53, 3.37)       | 30.85 (26.77, 35.53)                                     |                                                                      | 20.18 (16.11, 24.86)                                       |
|                        | Admitted to intensive care | 4.00 (3.19, 5.02)       | 42.01 (33.60, 52.46)                                     |                                                                      | 31.34 (22.94, 41.79)                                       |
| Stroke                 | Non-hospitalized           | 1.23 (1.15, 1.32)       | 9.79 (9.15, 10.48)                                       | 7.94<br>(7.87, 8.01)                                                 | 1.85 (1.21, 2.54)                                          |
|                        | Hospitalized               | 3.06 (2.60, 3.59)       | 24.08 (20.54, 28.22)                                     |                                                                      | 16.14 (12.60, 20.28)                                       |
|                        | Admitted to intensive care | 4.35 (3.38, 5.59)       | 34.06 (26.58, 43.60)                                     |                                                                      | 26.12 (18.64, 35.66)                                       |
| TIA                    | Non-hospitalized           | 1.35 (1.23, 1.47)       | 5.09 (4.65, 5.57)                                        | 3.79<br>(3.74, 3.84)                                                 | 1.30 (0.87, 1.79)                                          |
|                        | Hospitalized               | 2.47 (1.95, 3.14)       | 9.34 (7.36, 11.84)                                       |                                                                      | 5.55 (3.58, 8.05)                                          |
|                        | Admitted to intensive care | 2.83 (1.89, 4.24)       | 10.69 (7.16, 15.96)                                      |                                                                      | 6.91 (3.37, 12.17)                                         |
| <b>Dysrhythmia</b>     | Non-hospitalized           | 1.33 (1.29, 1.38)       | 39.36 (38.06, 40.70)                                     | 29.64<br>(29.50, 29.78)                                              | 9.72 (8.42, 11.06)                                         |
|                        | Hospitalized               | 3.89 (3.55, 4.27)       | 110.50 (101.23, 120.55)                                  |                                                                      | 80.86 (71.59, 90.91)                                       |
|                        | Admitted to intensive care | 7.93 (7.00, 8.98)       | 212.25 (189.94, 236.77)                                  |                                                                      | 182.61 (160.30, 207.13)                                    |
| Atrial fibrillation    | Non-hospitalized           | 1.32 (1.26, 1.39)       | 20.33 (19.35, 21.35)                                     | 15.45<br>(15.34, 15.55)                                              | 4.88 (3.90, 5.91)                                          |
|                        | Hospitalized               | 3.94 (3.45, 4.51)       | 59.50 (52.23, 67.74)                                     |                                                                      | 44.05 (36.78, 52.30)                                       |
|                        | Admitted to intensive care | 7.69 (6.54, 9.03)       | 112.79 (96.84, 131.16)                                   |                                                                      | 97.34 (81.39, 115.72)                                      |
| Sinus tachycardia      | Non-hospitalized           | 1.37 (1.28, 1.46)       | 9.48 (8.90, 10.10)                                       | 6.95<br>(6.88, 7.02)                                                 | 2.53 (1.95, 3.15)                                          |
|                        | Hospitalized               | 5.03 (4.33, 5.83)       | 34.45 (29.76, 39.86)                                     |                                                                      | 27.50 (22.82, 32.91)                                       |
|                        | Admitted to intensive care | 10.36 (8.35, 12.85)     | 69.71 (56.59, 85.72)                                     |                                                                      | 62.76 (49.64, 78.77)                                       |
| Sinus bradycardia      | Non-hospitalized           | 1.29 (1.22, 1.37)       | 10.97 (10.35, 11.62)                                     | 8.52<br>(8.45, 8.60)                                                 | 2.44 (1.82, 3.09)                                          |
|                        | Hospitalized               | 2.82 (2.41, 3.28)       | 23.82 (20.46, 27.72)                                     |                                                                      | 15.30 (11.94, 19.20)                                       |
|                        | Admitted to intensive care | 4.81 (3.84, 6.01)       | 40.31 (32.35, 50.17)                                     |                                                                      | 31.79 (23.83, 41.65)                                       |
| Ventricular arrhythmia | Non-hospitalized           | 1.35 (1.25, 1.46)       | 6.89 (6.38, 7.44)                                        | 5.09<br>(5.03, 5.15)                                                 | 1.80 (1.29, 2.35)                                          |
|                        | Hospitalized               | 3.90 (3.16, 4.81)       | 19.71 (16.01, 24.24)                                     |                                                                      | 14.62 (10.92, 19.15)                                       |
|                        | Admitted to intensive care | 8.14 (6.32, 10.47)      | 40.67 (31.75, 52.01)                                     |                                                                      | 35.57 (26.66, 46.92)                                       |
| Atrial flutter         | Non-hospitalized           | 1.33 (1.20, 1.46)       | 5.31 (4.81, 5.85)                                        |                                                                      | 1.31 (0.82, 1.85)                                          |

|                                   |                            |                      |                         |                         |                       |
|-----------------------------------|----------------------------|----------------------|-------------------------|-------------------------|-----------------------|
|                                   | Hospitalized               | 3.53 (2.77, 4.49)    | 14.04 (11.05, 17.83)    | 4.00<br>(3.95, 4.05)    | 10.04 (7.06, 13.83)   |
|                                   | Admitted to intensive care | 8.34 (6.45, 10.78)   | 32.86 (25.52, 42.27)    |                         | 28.86 (21.52, 38.28)  |
| <b>Inflammatory heart disease</b> | Non-hospitalized           | 1.50 (1.28, 1.76)    | 1.86 (1.59, 2.19)       | 1.25<br>(1.22, 1.28)    | 0.62 (0.34, 0.94)     |
|                                   | Hospitalized               | 5.72 (4.02, 8.15)    | 7.11 (5.00, 10.11)      |                         | 5.86 (3.75, 8.86)     |
|                                   | Admitted to intensive care | 9.87 (5.64, 17.25)   | 12.22 (7.01, 21.27)     |                         | 10.98 (5.77, 20.03)   |
| Pericarditis                      | Non-hospitalized           | 1.38 (1.17, 1.64)    | 1.64 (1.39, 1.94)       | 1.19<br>(1.16, 1.22)    | 0.46 (0.20, 0.76)     |
|                                   | Hospitalized               | 5.34 (3.60, 7.91)    | 6.32 (4.27, 9.35)       |                         | 5.13 (3.08, 8.16)     |
|                                   | Admitted to intensive care | 9.49 (5.17, 17.41)   | 11.20 (6.12, 20.46)     |                         | 10.02 (4.94, 19.27)   |
| Myocarditis                       | Non-hospitalized           | 3.47 (2.25, 5.35)    | 0.25 (0.16, 0.39)       | 0.07<br>(0.07, 0.08)    | 0.18 (0.09, 0.31)     |
|                                   | Hospitalized               | 12.13 (7.22, 20.36)  | 0.88 (0.52, 1.47)       |                         | 0.80 (0.45, 1.40)     |
|                                   | Admitted to intensive care | 35.57 (13.56, 93.26) | 2.57 (0.98, 6.72)       |                         | 2.49 (0.91, 6.64)     |
| <b>Ischemic heart disease</b>     | Non-hospitalized           | 1.24 (1.18, 1.31)    | 14.14 (13.42, 14.90)    | 11.38<br>(11.30, 11.47) | 2.76 (2.03, 3.52)     |
|                                   | Hospitalized               | 3.76 (3.24, 4.36)    | 42.13 (36.47, 48.65)    |                         | 30.75 (25.08, 37.27)  |
|                                   | Admitted to intensive care | 5.65 (4.75, 6.72)    | 62.65 (52.97, 74.03)    |                         | 51.27 (41.59, 62.64)  |
| Acute coronary disease            | Non-hospitalized           | 1.16 (1.08, 1.24)    | 8.78 (8.21, 9.40)       | 7.58<br>(7.51, 7.66)    | 1.20 (0.62, 1.81)     |
|                                   | Hospitalized               | 3.94 (3.28, 4.72)    | 29.53 (24.68, 35.32)    |                         | 21.95 (17.09, 27.74)  |
|                                   | Admitted to intensive care | 7.05 (5.88, 8.46)    | 52.27 (43.78, 62.35)    |                         | 44.68 (36.19, 54.77)  |
| Myocardial infarction             | Non-hospitalized           | 1.08 (0.99, 1.18)    | 5.12 (4.68, 5.59)       | 4.73<br>(4.67, 4.78)    | 0.39 (-0.04, 0.86)    |
|                                   | Hospitalized               | 4.35 (3.41, 5.56)    | 20.42 (16.04, 25.99)    |                         | 15.69 (11.31, 21.26)  |
|                                   | Admitted to intensive care | 8.02 (6.48, 9.91)    | 37.27 (30.24, 45.90)    |                         | 32.54 (25.51, 41.17)  |
| Ischemic cardiomyopathy           | Non-hospitalized           | 1.17 (1.06, 1.30)    | 3.83 (3.45, 4.24)       | 3.27<br>(3.22, 3.31)    | 0.56 (0.18, 0.98)     |
|                                   | Hospitalized               | 3.34 (2.34, 4.77)    | 10.88 (7.63, 15.49)     |                         | 7.61 (4.37, 12.22)    |
|                                   | Admitted to intensive care | 4.22 (3.07, 5.79)    | 13.71 (10.00, 18.77)    |                         | 10.44 (6.73, 15.50)   |
| Angina                            | Non-hospitalized           | 1.40 (1.29, 1.50)    | 6.82 (6.32, 7.35)       | 4.89<br>(4.83, 4.95)    | 1.93 (1.43, 2.46)     |
|                                   | Hospitalized               | 3.34 (2.72, 4.10)    | 16.24 (13.24, 19.91)    |                         | 11.35 (8.35, 15.02)   |
|                                   | Admitted to intensive care | 2.88 (2.00, 4.15)    | 14.03 (9.77, 20.14)     |                         | 9.14 (4.88, 15.25)    |
| <b>Other cardiac disorders</b>    | Non-hospitalized           | 1.37 (1.31, 1.43)    | 24.59 (23.53, 25.69)    | 18.03<br>(17.92, 18.14) | 6.56 (5.50, 7.67)     |
|                                   | Hospitalized               | 3.94 (3.52, 4.42)    | 69.19 (61.95, 77.24)    |                         | 51.16 (43.92, 59.21)  |
|                                   | Admitted to intensive care | 6.90 (5.94, 8.00)    | 117.93 (102.50, 135.51) |                         | 99.90 (84.47, 117.48) |
| Heart failure                     | Non-hospitalized           | 1.37 (1.31, 1.44)    | 22.52 (21.50, 23.59)    | 16.48<br>(16.37, 16.58) | 6.05 (5.03, 7.11)     |
|                                   | Hospitalized               | 3.93 (3.50, 4.43)    | 63.27 (56.43, 70.89)    |                         | 46.79 (39.96, 54.42)  |
|                                   | Admitted to intensive care | 6.05 (5.18, 7.07)    | 95.67 (82.44, 110.89)   |                         | 79.19 (65.97, 94.41)  |
| Non-ischemic cardiomyopathy       | Non-hospitalized           | 1.31 (1.22, 1.41)    | 7.56 (7.03, 8.13)       |                         | 1.77 (1.24, 2.34)     |
|                                   | Hospitalized               | 3.20 (2.65, 3.86)    | 18.40 (15.27, 22.16)    |                         | 12.61 (9.49, 16.37)   |

|                             |                            |                      |                         |                         |                         |
|-----------------------------|----------------------------|----------------------|-------------------------|-------------------------|-------------------------|
|                             | Admitted to intensive care | 6.17 (4.72, 8.07)    | 35.15 (26.99, 45.72)    | 5.79<br>(5.72, 5.85)    | 29.37 (21.21, 39.93)    |
| Cardiac arrest              | Non-hospitalized           | 0.91 (0.71, 1.17)    | 0.46 (0.36, 0.59)       | 0.51<br>(0.49, 0.53)    | -0.04 (-0.15, 0.09)     |
|                             | Hospitalized               | 5.62 (3.73, 8.44)    | 2.85 (1.90, 4.28)       |                         | 2.34 (1.39, 3.77)       |
|                             | Admitted to intensive care | 29.72 (20.14, 43.86) | 14.99 (10.18, 22.05)    |                         | 14.49 (9.68, 21.54)     |
| Cardiogenic shock           | Non-hospitalized           | 1.15 (0.78, 1.71)    | 0.41 (0.28, 0.61)       | 0.36<br>(0.34, 0.37)    | 0.05 (-0.08, 0.25)      |
|                             | Hospitalized               | 5.28 (3.02, 9.25)    | 1.87 (1.07, 3.28)       |                         | 1.52 (0.72, 2.92)       |
|                             | Admitted to intensive care | 17.58 (11.90, 25.98) | 6.22 (4.22, 9.18)       |                         | 5.87 (3.86, 8.83)       |
| Thrombotic disorders        | Non-hospitalized           | 1.74 (1.64, 1.84)    | 12.56 (11.86, 13.31)    | 7.25<br>(7.18, 7.32)    | 5.31 (4.61, 6.06)       |
|                             | Hospitalized               | 6.53 (5.75, 7.42)    | 46.44 (40.98, 52.61)    |                         | 39.19 (33.73, 45.36)    |
|                             | Admitted to intensive care | 14.51 (12.30, 17.13) | 100.24 (85.61, 117.20)  |                         | 92.99 (78.36, 109.95)   |
| Pulmonary embolism          | Non-hospitalized           | 2.01 (1.84, 2.19)    | 5.78 (5.31, 6.29)       | 2.88<br>(2.84, 2.93)    | 2.89 (2.42, 3.41)       |
|                             | Hospitalized               | 9.42 (8.09, 10.97)   | 26.83 (23.08, 31.18)    |                         | 23.95 (20.20, 28.30)    |
|                             | Admitted to intensive care | 21.71 (17.38, 27.12) | 60.76 (48.95, 75.30)    |                         | 57.87 (46.06, 72.42)    |
| Deep vein thrombosis        | Non-hospitalized           | 1.62 (1.49, 1.76)    | 6.31 (5.82, 6.85)       | 3.90<br>(3.85, 3.95)    | 2.41 (1.92, 2.95)       |
|                             | Hospitalized               | 4.44 (3.52, 5.59)    | 17.17 (13.65, 21.58)    |                         | 13.27 (9.76, 17.68)     |
|                             | Admitted to intensive care | 9.43 (7.31, 12.16)   | 36.14 (28.13, 46.39)    |                         | 32.25 (24.23, 42.49)    |
| Superficial vein thrombosis | Non-hospitalized           | 1.38 (1.25, 1.52)    | 3.82 (3.46, 4.21)       | 2.78<br>(2.73, 2.82)    | 1.04 (0.69, 1.43)       |
|                             | Hospitalized               | 4.48 (3.66, 5.48)    | 12.37 (10.12, 15.12)    |                         | 9.59 (7.34, 12.34)      |
|                             | Admitted to intensive care | 10.32 (7.99, 13.32)  | 28.27 (21.97, 36.36)    |                         | 25.50 (19.19, 33.58)    |
| MACE                        | Non-hospitalized           | 1.26 (1.22, 1.30)    | 56.12 (54.27, 58.04)    | 44.83<br>(44.66, 45.00) | 11.29 (9.44, 13.20)     |
|                             | Hospitalized               | 2.41 (2.21, 2.63)    | 104.81 (96.50, 113.79)  |                         | 59.98 (51.67, 68.96)    |
|                             | Admitted to intensive care | 4.36 (3.87, 4.91)    | 181.32 (162.79, 201.70) |                         | 136.49 (117.96, 156.87) |
| Any cardiovascular outcome  | Non-hospitalized           | 1.39 (1.36, 1.43)    | 105.38 (102.93, 107.88) | 76.88<br>(76.66, 77.11) | 28.50 (26.05, 31.00)    |
|                             | Hospitalized               | 3.43 (3.21, 3.66)    | 239.78 (226.34, 253.89) |                         | 162.90 (149.45, 177.01) |
|                             | Admitted to intensive care | 6.19 (5.61, 6.84)    | 390.73 (361.71, 421.23) |                         | 313.85 (284.82, 344.35) |

\*. Outcomes were ascertained from day 30 after the initial positive COVID-19 test result until end of follow up.

†. Based on care received within the first 30 days after a positive COVID-19 test result.

‡. Adjustment through inverse probability weighting using predefined variables and algorithmically selected high-dimensional variables.

CI, confidence interval; TIA, transient ischemic attack; MACE, major adverse cardiac events.

**Supplementary Table 9. Risks and 12-month burdens of incident post-acute COVID-19 cardiovascular outcomes compared to historical control**

| Outcome*                          | Hazard Ratio (95% CI) <sup>†</sup> | COVID-19 burden per 1000 persons at 12 months (95% CI) <sup>†</sup> | Historical control burden per 1000 persons at 12 months (95% CI) <sup>†</sup> | Burden difference per 1000 persons at 12 months (95% CI) <sup>†</sup> |
|-----------------------------------|------------------------------------|---------------------------------------------------------------------|-------------------------------------------------------------------------------|-----------------------------------------------------------------------|
|                                   | COVID-19 vs Historical control     |                                                                     |                                                                               |                                                                       |
| <b>Cerebrovascular</b>            | 1.49 (1.41, 1.57)                  | 15.95 (15.13, 16.83)                                                | 10.77 (10.68, 10.85)                                                          | 5.19 (4.36, 6.06)                                                     |
| Stroke                            | 1.49 (1.40, 1.59)                  | 11.80 (11.08, 12.56)                                                | 7.93 (7.86, 8.00)                                                             | 3.87 (3.15, 4.62)                                                     |
| TIA                               | 1.41 (1.30, 1.54)                  | 5.62 (5.16, 6.12)                                                   | 3.98 (3.93, 4.03)                                                             | 1.64 (1.18, 2.14)                                                     |
| <b>Dysrhythmia</b>                | 1.57 (1.51, 1.62)                  | 49.37 (47.82, 50.97)                                                | 31.83 (31.68, 31.98)                                                          | 17.54 (15.99, 19.14)                                                  |
| Atrial fibrillation               | 1.62 (1.55, 1.70)                  | 25.99 (24.86, 27.16)                                                | 16.11 (16.00, 16.22)                                                          | 9.88 (8.75, 11.05)                                                    |
| Sinus tachycardia                 | 1.72 (1.63, 1.82)                  | 12.68 (11.97, 13.43)                                                | 7.38 (7.31, 7.45)                                                             | 5.30 (4.59, 6.05)                                                     |
| Sinus bradycardia                 | 1.35 (1.27, 1.42)                  | 13.35 (12.63, 14.11)                                                | 9.93 (9.85, 10.02)                                                            | 3.42 (2.69, 4.18)                                                     |
| Ventricular arrhythmia            | 1.93 (1.80, 2.07)                  | 9.17 (8.55, 9.83)                                                   | 4.76 (4.70, 4.82)                                                             | 4.41 (3.79, 5.07)                                                     |
| Atrial flutter                    | 1.81 (1.67, 1.96)                  | 6.98 (6.43, 7.57)                                                   | 3.86 (3.81, 3.91)                                                             | 3.12 (2.57, 3.71)                                                     |
| <b>Inflammatory heart disease</b> | 2.10 (1.84, 2.39)                  | 2.44 (2.14, 2.78)                                                   | 1.16 (1.14, 1.19)                                                             | 1.28 (0.97, 1.62)                                                     |
| Pericarditis                      | 1.88 (1.64, 2.17)                  | 2.13 (1.85, 2.45)                                                   | 1.13 (1.10, 1.16)                                                             | 1.00 (0.72, 1.32)                                                     |
| Myocarditis                       | 8.77 (6.15, 12.51)                 | 0.38 (0.27, 0.53)                                                   | 0.04 (0.04, 0.05)                                                             | 0.34 (0.22, 0.49)                                                     |
| <b>Ischemic heart disease</b>     | 1.52 (1.40, 1.65)                  | 18.47 (16.99, 20.07)                                                | 12.19 (12.10, 12.28)                                                          | 6.28 (4.80, 7.88)                                                     |
| Acute coronary disease            | 1.72 (1.55, 1.90)                  | 12.82 (11.60, 14.16)                                                | 7.49 (7.41, 7.56)                                                             | 5.33 (4.11, 6.68)                                                     |
| Myocardial infarction             | 1.71 (1.59, 1.84)                  | 7.59 (7.05, 8.17)                                                   | 4.45 (4.39, 4.50)                                                             | 3.14 (2.60, 3.72)                                                     |
| Ischemic cardiomyopathy           | 1.62 (1.33, 1.97)                  | 5.47 (4.50, 6.64)                                                   | 3.37 (3.33, 3.42)                                                             | 2.09 (1.12, 3.27)                                                     |
| Angina                            | 1.24 (1.15, 1.33)                  | 7.28 (6.78, 7.81)                                                   | 5.90 (5.83, 5.96)                                                             | 1.38 (0.88, 1.92)                                                     |
| <b>Other cardiac disorders</b>    | 1.59 (1.53, 1.65)                  | 30.67 (29.48, 31.90)                                                | 19.41 (19.29, 19.53)                                                          | 11.26 (10.07, 12.49)                                                  |
| Heart failure                     | 1.58 (1.51, 1.65)                  | 27.92 (26.79, 29.10)                                                | 17.77 (17.66, 17.88)                                                          | 10.15 (9.02, 11.33)                                                   |
| Non-ischemic cardiomyopathy       | 1.51 (1.41, 1.61)                  | 9.32 (8.72, 9.96)                                                   | 6.18 (6.12, 6.25)                                                             | 3.13 (2.53, 3.77)                                                     |
| Cardiac arrest                    | 2.51 (2.13, 2.97)                  | 1.20 (1.02, 1.42)                                                   | 0.48 (0.46, 0.50)                                                             | 0.72 (0.54, 0.94)                                                     |
| Cardiogenic shock                 | 2.52 (1.93, 3.29)                  | 0.87 (0.66, 1.13)                                                   | 0.34 (0.33, 0.36)                                                             | 0.52 (0.32, 0.78)                                                     |
| <b>Thrombotic disorders</b>       | 2.66 (2.53, 2.80)                  | 17.07 (16.25, 17.94)                                                | 6.45 (6.39, 6.52)                                                             | 10.62 (9.79, 11.48)                                                   |
| Pulmonary embolism                | 3.72 (3.46, 4.00)                  | 8.31 (7.75, 8.92)                                                   | 2.24 (2.20, 2.28)                                                             | 6.07 (5.51, 6.68)                                                     |
| Deep vein thrombosis              | 2.17 (2.01, 2.33)                  | 8.04 (7.48, 8.65)                                                   | 3.72 (3.67, 3.77)                                                             | 4.32 (3.76, 4.93)                                                     |
| Superficial vein thrombosis       | 2.09 (1.92, 2.27)                  | 5.37 (4.95, 5.82)                                                   | 2.58 (2.53, 2.62)                                                             | 2.80 (2.38, 3.25)                                                     |

|                                                                                                                                                                                                                                                                                                                                                             |                   |                         |                      |                      |
|-------------------------------------------------------------------------------------------------------------------------------------------------------------------------------------------------------------------------------------------------------------------------------------------------------------------------------------------------------------|-------------------|-------------------------|----------------------|----------------------|
| <b>MACE</b>                                                                                                                                                                                                                                                                                                                                                 | 1.60 (1.55, 1.65) | 67.67 (65.73, 69.67)    | 42.81 (42.64, 42.98) | 24.86 (22.92, 26.86) |
| <b>Any cardiovascular outcome</b>                                                                                                                                                                                                                                                                                                                           | 1.58 (1.54, 1.62) | 121.60 (118.52, 124.76) | 78.75 (78.52, 78.98) | 42.85 (39.77, 46.00) |
| <p>*. Outcomes were ascertained from day 30 after the initial positive COVID-19 test result until end of follow up<br/> †. Adjustment through inverse probability weighting using predefined and algorithmically selected high-dimensional variables.<br/> CI, confidence interval; TIA, transient ischemic attack; MACE, major adverse cardiac events.</p> |                   |                         |                      |                      |

**Supplementary Table 10. Subgroup analyses of the risks of incident post-acute COVID-19 composite cardiovascular outcomes compared to historical control**

| Risk factors               | Hazard ratio (95% CI)* - COVID-19 vs Historical control |                      |                            |                        |                         |                      |                      |                            |
|----------------------------|---------------------------------------------------------|----------------------|----------------------------|------------------------|-------------------------|----------------------|----------------------|----------------------------|
|                            | Cerebro-vascular                                        | Dysrhythmia          | Inflammatory heart disease | Ischemic heart disease | Other cardiac disorders | Thrombotic disorders | MACE                 | Any cardiovascular outcome |
| <b>Age</b>                 |                                                         |                      |                            |                        |                         |                      |                      |                            |
| ≤65                        | 1.35<br>(1.21, 1.50)                                    | 1.50<br>(1.42, 1.58) | 1.97<br>(1.49, 2.61)       | 1.44<br>(1.25, 1.66)   | 1.39<br>(1.28, 1.51)    | 2.38<br>(2.18, 2.59) | 1.40<br>(1.30, 1.50) | 1.49<br>(1.43, 1.56)       |
| >65                        | 1.49<br>(1.40, 1.59)                                    | 1.52<br>(1.42, 1.62) | 2.13<br>(1.84, 2.47)       | 1.52<br>(1.43, 1.62)   | 1.67<br>(1.59, 1.75)    | 2.79<br>(2.62, 2.97) | 1.65<br>(1.59, 1.72) | 1.64<br>(1.57, 1.70)       |
| <b>Race</b>                |                                                         |                      |                            |                        |                         |                      |                      |                            |
| White                      | 1.52<br>(1.42, 1.62)                                    | 1.56<br>(1.49, 1.62) | 2.24<br>(1.91, 2.62)       | 1.43<br>(1.35, 1.51)   | 1.58<br>(1.50, 1.66)    | 2.53<br>(2.38, 2.69) | 1.59<br>(1.53, 1.65) | 1.60<br>(1.55, 1.65)       |
| Black                      | 1.45<br>(1.31, 1.60)                                    | 1.53<br>(1.44, 1.64) | 1.82<br>(1.46, 2.28)       | 1.84<br>(1.23, 2.76)   | 1.67<br>(1.54, 1.80)    | 2.71<br>(2.48, 2.97) | 1.76<br>(1.64, 1.88) | 1.65<br>(1.57, 1.73)       |
| <b>Sex</b>                 |                                                         |                      |                            |                        |                         |                      |                      |                            |
| Male                       | 1.47<br>(1.39, 1.55)                                    | 1.58<br>(1.53, 1.64) | 2.10<br>(1.82, 2.41)       | 1.49<br>(1.39, 1.61)   | 1.63<br>(1.57, 1.70)    | 2.69<br>(2.55, 2.83) | 1.56<br>(1.51, 1.61) | 1.61<br>(1.57, 1.66)       |
| Female                     | 1.13<br>(0.89, 1.43)                                    | 1.42<br>(1.26, 1.59) | 2.10<br>(1.46, 3.01)       | 1.26<br>(1.02, 1.57)   | 1.25<br>(1.02, 1.53)    | 1.81<br>(1.46, 2.24) | 1.38<br>(1.14, 1.67) | 1.40<br>(1.27, 1.55)       |
| <b>Obesity<sup>†</sup></b> |                                                         |                      |                            |                        |                         |                      |                      |                            |
| No                         | 1.50<br>(1.40, 1.62)                                    | 1.60<br>(1.52, 1.69) | 2.20<br>(1.81, 2.69)       | 1.56<br>(1.40, 1.75)   | 1.77<br>(1.66, 1.88)    | 2.77<br>(2.58, 2.98) | 1.58<br>(1.51, 1.64) | 1.67<br>(1.61, 1.73)       |
| Yes                        | 1.50<br>(1.39, 1.63)                                    | 1.45<br>(1.39, 1.52) | 1.97<br>(1.67, 2.33)       | 1.37<br>(1.28, 1.48)   | 1.46<br>(1.39, 1.54)    | 2.48<br>(2.30, 2.67) | 1.56<br>(1.49, 1.64) | 1.53<br>(1.48, 1.58)       |
| <b>Smoking</b>             |                                                         |                      |                            |                        |                         |                      |                      |                            |
| No                         | 1.41<br>(1.34, 1.48)                                    | 1.38<br>(1.35, 1.42) | 1.94<br>(1.71, 2.19)       | 1.45<br>(1.38, 1.52)   | 1.51<br>(1.46, 1.56)    | 2.27<br>(2.16, 2.37) | 1.52<br>(1.48, 1.57) | 1.51<br>(1.48, 1.54)       |
| Yes                        | 1.57<br>(1.38, 1.78)                                    | 1.58<br>(1.46, 1.72) | 2.04<br>(1.47, 2.84)       | 1.49<br>(1.29, 1.72)   | 1.50<br>(1.35, 1.67)    | 2.28<br>(2.00, 2.60) | 1.57<br>(1.46, 1.68) | 1.57<br>(1.48, 1.67)       |

| <b>Hypertension</b>                                                                                                                                                                                                                                                                                                                                                                                                                             |                      |                      |                      |                      |                      |                      |                      |                      |
|-------------------------------------------------------------------------------------------------------------------------------------------------------------------------------------------------------------------------------------------------------------------------------------------------------------------------------------------------------------------------------------------------------------------------------------------------|----------------------|----------------------|----------------------|----------------------|----------------------|----------------------|----------------------|----------------------|
| No                                                                                                                                                                                                                                                                                                                                                                                                                                              | 1.52<br>(1.42, 1.63) | 1.57<br>(1.51, 1.64) | 2.10<br>(1.78, 2.49) | 1.48<br>(1.25, 1.74) | 1.59<br>(1.51, 1.67) | 2.70<br>(2.54, 2.87) | 1.60<br>(1.54, 1.66) | 1.59<br>(1.54, 1.64) |
| Yes                                                                                                                                                                                                                                                                                                                                                                                                                                             | 1.48<br>(1.35, 1.61) | 1.47<br>(1.39, 1.55) | 2.24<br>(1.81, 2.77) | 1.65<br>(1.50, 1.83) | 1.65<br>(1.55, 1.76) | 2.51<br>(2.29, 2.74) | 1.66<br>(1.57, 1.75) | 1.58<br>(1.51, 1.64) |
| <b>Diabetes</b>                                                                                                                                                                                                                                                                                                                                                                                                                                 |                      |                      |                      |                      |                      |                      |                      |                      |
| No                                                                                                                                                                                                                                                                                                                                                                                                                                              | 1.56<br>(1.45, 1.69) | 1.57<br>(1.51, 1.64) | 2.04<br>(1.69, 2.45) | 1.64<br>(1.38, 1.96) | 1.70<br>(1.60, 1.8)  | 2.76<br>(2.58, 2.95) | 1.63<br>(1.57, 1.70) | 1.61<br>(1.56, 1.66) |
| Yes                                                                                                                                                                                                                                                                                                                                                                                                                                             | 1.39<br>(1.29, 1.49) | 1.42<br>(1.34, 1.50) | 1.95<br>(1.65, 2.31) | 1.33<br>(1.25, 1.42) | 1.42<br>(1.35, 1.49) | 2.38<br>(2.22, 2.56) | 1.50<br>(1.44, 1.56) | 1.50<br>(1.43, 1.58) |
| <b>Chronic kidney disease<sup>‡</sup></b>                                                                                                                                                                                                                                                                                                                                                                                                       |                      |                      |                      |                      |                      |                      |                      |                      |
| No                                                                                                                                                                                                                                                                                                                                                                                                                                              | 1.54<br>(1.44, 1.65) | 1.56<br>(1.49, 1.63) | 2.07<br>(1.74, 2.46) | 1.53<br>(1.31, 1.79) | 1.63<br>(1.55, 1.72) | 2.70<br>(2.54, 2.87) | 1.61<br>(1.55, 1.68) | 1.59<br>(1.54, 1.64) |
| Yes                                                                                                                                                                                                                                                                                                                                                                                                                                             | 1.43<br>(1.30, 1.56) | 1.44<br>(1.36, 1.52) | 2.05<br>(1.71, 2.47) | 1.47<br>(1.34, 1.60) | 1.54<br>(1.44, 1.64) | 2.50<br>(2.29, 2.74) | 1.56<br>(1.48, 1.64) | 1.54<br>(1.43, 1.65) |
| <b>Hyperlipidemia</b>                                                                                                                                                                                                                                                                                                                                                                                                                           |                      |                      |                      |                      |                      |                      |                      |                      |
| No                                                                                                                                                                                                                                                                                                                                                                                                                                              | 1.62<br>(1.52, 1.74) | 1.50<br>(1.44, 1.57) | 2.22<br>(1.90, 2.61) | 1.57<br>(1.48, 1.67) | 1.72<br>(1.64, 1.80) | 2.75<br>(2.59, 2.93) | 1.70<br>(1.64, 1.76) | 1.64<br>(1.59, 1.68) |
| Yes                                                                                                                                                                                                                                                                                                                                                                                                                                             | 1.34<br>(1.23, 1.46) | 1.49<br>(1.41, 1.58) | 1.67<br>(1.38, 2.03) | 1.38<br>(1.16, 1.63) | 1.32<br>(1.23, 1.41) | 2.43<br>(2.24, 2.64) | 1.41<br>(1.34, 1.48) | 1.45<br>(1.39, 1.52) |
| <b>Cardiovascular disease</b>                                                                                                                                                                                                                                                                                                                                                                                                                   |                      |                      |                      |                      |                      |                      |                      |                      |
| No                                                                                                                                                                                                                                                                                                                                                                                                                                              | 1.43<br>(1.34, 1.53) | 1.54<br>(1.46, 1.63) | 2.03<br>(1.70, 2.43) | 1.42<br>(1.33, 1.51) | 1.58<br>(1.51, 1.67) | 2.64<br>(2.49, 2.81) | 1.60<br>(1.54, 1.66) | 1.58<br>(1.54, 1.63) |
| Yes                                                                                                                                                                                                                                                                                                                                                                                                                                             | 1.33<br>(1.21, 1.45) | 1.32<br>(1.24, 1.40) | 1.87<br>(1.59, 2.21) | 1.24<br>(1.16, 1.34) | 1.41<br>(1.32, 1.50) | 1.97<br>(1.80, 2.15) | 1.35<br>(1.29, 1.41) | NA                   |
| <p>*. Adjustment through inverse probability weighting using predefined and algorithmically selected high-dimensional variables.<br/> †. Obesity was defined based on baseline BMI&gt;30kg/m<sup>2</sup><br/> ‡. Chronic kidney disease was defined based on baseline outpatient estimated Glomerular Filtration Rate&lt; 60 mL/min/1.73 m<sup>2</sup><br/> CI, confidence interval; MACE, major adverse cardiac events, NA, not applicable</p> |                      |                      |                      |                      |                      |                      |                      |                      |



**Supplementary Table 11. Risks and 12-month burdens of incident post-acute COVID-19 cardiovascular outcomes in participants without any history of cardiovascular outcomes prior to COVID-19 exposure compared to historical control**

| Outcome*                          | Hazard Ratio (95% CI)†         | COVID-19 burden per 1000 persons at 12 months (95% CI) † | Historical control burden per 1000 persons at 12 months (95% CI) † | Burden difference per 1000 persons at 12 months (95% CI) † |
|-----------------------------------|--------------------------------|----------------------------------------------------------|--------------------------------------------------------------------|------------------------------------------------------------|
|                                   | COVID-19 vs Historical control |                                                          |                                                                    |                                                            |
| <b>Cerebrovascular</b>            | 1.43 (1.34, 1.53)              | 13.45 (12.61, 14.34)                                     | 9.40 (9.31, 9.48)                                                  | 4.05 (3.22, 4.94)                                          |
| Stroke                            | 1.42 (1.32, 1.53)              | 9.78 (9.08, 10.55)                                       | 6.90 (6.83, 6.97)                                                  | 2.88 (2.18, 3.65)                                          |
| TIA                               | 1.39 (1.25, 1.55)              | 4.49 (4.03, 5.00)                                        | 3.22 (3.17, 3.27)                                                  | 1.27 (0.81, 1.78)                                          |
| <b>Dysrhythmia</b>                | 1.54 (1.46, 1.63)              | 43.73 (41.42, 46.17)                                     | 28.61 (28.46, 28.75)                                               | 15.13 (12.81, 17.56)                                       |
| Atrial fibrillation               | 1.49 (1.41, 1.58)              | 20.21 (19.12, 21.37)                                     | 13.60 (13.50, 13.71)                                               | 6.61 (5.52, 7.76)                                          |
| Sinus tachycardia                 | 1.72 (1.61, 1.84)              | 10.83 (10.12, 11.60)                                     | 6.31 (6.24, 6.38)                                                  | 4.52 (3.80, 5.29)                                          |
| Sinus bradycardia                 | 1.34 (1.25, 1.43)              | 11.03 (10.29, 11.83)                                     | 8.27 (8.19, 8.35)                                                  | 2.77 (2.02, 3.56)                                          |
| Ventricular arrhythmia            | 2.29 (1.72, 3.04)              | 6.91 (5.21, 9.16)                                        | 3.03 (2.98, 3.08)                                                  | 3.88 (2.18, 6.13)                                          |
| Atrial flutter                    | 1.88 (1.67, 2.12)              | 4.46 (3.97, 5.03)                                        | 2.37 (2.33, 2.41)                                                  | 2.09 (1.59, 2.66)                                          |
| <b>Inflammatory heart disease</b> | 2.04 (1.71, 2.44)              | 1.71 (1.43, 2.05)                                        | 0.84 (0.81, 0.86)                                                  | 0.87 (0.59, 1.21)                                          |
| Pericarditis                      | 1.82 (1.49, 2.21)              | 1.48 (1.21, 1.79)                                        | 0.81 (0.79, 0.84)                                                  | 0.66 (0.40, 0.98)                                          |
| Myocarditis                       | 9.36 (6.17, 14.21)             | 0.30 (0.20, 0.44)                                        | 0.03 (0.03, 0.04)                                                  | 0.27 (0.17, 0.41)                                          |
| <b>Ischemic heart disease</b>     | 1.42 (1.33, 1.51)              | 12.92 (12.16, 13.73)                                     | 9.13 (9.05, 9.21)                                                  | 3.79 (3.04, 4.60)                                          |
| Acute coronary disease            | 1.62 (1.49, 1.76)              | 7.92 (7.30, 8.60)                                        | 4.90 (4.84, 4.96)                                                  | 3.02 (2.40, 3.69)                                          |
| Myocardial infarction             | 1.58 (1.43, 1.75)              | 5.12 (4.63, 5.67)                                        | 3.24 (3.19, 3.29)                                                  | 1.89 (1.39, 2.43)                                          |
| Ischemic cardiomyopathy           | 1.52 (1.30, 1.78)              | 2.39 (2.04, 2.79)                                        | 1.57 (1.54, 1.61)                                                  | 0.81 (0.46, 1.22)                                          |
| Angina                            | 1.21 (1.11, 1.31)              | 5.82 (5.36, 6.32)                                        | 4.81 (4.75, 4.87)                                                  | 1.01 (0.55, 1.51)                                          |
| <b>Other cardiac disorders</b>    | 1.58 (1.50, 1.66)              | 24.45 (23.26, 25.71)                                     | 15.53 (15.42, 15.64)                                               | 8.92 (7.72, 10.17)                                         |
| Heart failure                     | 1.60 (1.51, 1.69)              | 21.41 (20.27, 22.61)                                     | 13.45 (13.35, 13.55)                                               | 7.96 (6.82, 9.16)                                          |
| Non-ischemic cardiomyopathy       | 1.48 (1.34, 1.64)              | 5.21 (4.71, 5.78)                                        | 3.52 (3.47, 3.57)                                                  | 1.70 (1.19, 2.26)                                          |
| Cardiac arrest                    | 3.03 (2.06, 4.46)              | 0.80 (0.54, 1.17)                                        | 0.26 (0.25, 0.28)                                                  | 0.54 (0.28, 0.91)                                          |
| Cardiogenic shock                 | 2.05 (1.39, 3.04)              | 0.30 (0.20, 0.44)                                        | 0.14 (0.13, 0.15)                                                  | 0.15 (0.06, 0.29)                                          |
| <b>Thrombotic disorders</b>       | 2.65 (2.49, 2.81)              | 14.97 (14.11, 15.87)                                     | 5.68 (5.61, 5.75)                                                  | 9.29 (8.43, 10.19)                                         |
| Pulmonary embolism                | 3.95 (3.63, 4.31)              | 7.24 (6.65, 7.87)                                        | 1.84 (1.80, 1.87)                                                  | 5.40 (4.81, 6.04)                                          |
| Deep vein thrombosis              | 2.09 (1.91, 2.29)              | 6.60 (6.04, 7.21)                                        | 3.16 (3.11, 3.21)                                                  | 3.44 (2.87, 4.05)                                          |
| Superficial vein thrombosis       | 2.19 (1.97, 2.44)              | 3.97 (3.57, 4.42)                                        | 1.81 (1.78, 1.85)                                                  | 2.16 (1.76, 2.61)                                          |
| <b>MACE</b>                       | 1.59 (1.53, 1.65)              | 57.25 (55.19, 59.39)                                     | 36.37 (36.21, 36.53)                                               | 20.89 (18.82, 23.02)                                       |

|                                                                                                                                                                                                                                                                                                                                                                 |                   |                         |                      |                      |
|-----------------------------------------------------------------------------------------------------------------------------------------------------------------------------------------------------------------------------------------------------------------------------------------------------------------------------------------------------------------|-------------------|-------------------------|----------------------|----------------------|
| <b>Any cardiovascular outcome</b>                                                                                                                                                                                                                                                                                                                               | 1.58 (1.54, 1.62) | 121.60 (118.52, 124.76) | 78.75 (78.52, 78.98) | 42.85 (39.77, 46.00) |
| <p>*. Outcomes were ascertained from day 30 after the initial positive COVID-19 test result until end of follow up</p> <p>†. Adjustment through inverse probability weighting using predefined and algorithmically selected high-dimensional variables.</p> <p>CI, confidence interval; TIA, transient ischemic attack; MACE, major adverse cardiac events.</p> |                   |                         |                      |                      |

**Supplementary Table 12. Demographic and health characteristics of the COVID-19 and historical cohorts by care setting of the acute infection before weighting**

| <b>Baseline Characteristics</b>                       | <b>Non-hospitalized (N=131,612)</b> | <b>Hospitalized (N=16,760)</b> | <b>Admitted to intensive care (N=5,388)</b> | <b>Historical control (N=5,859,411)</b> | <b>Absolute standardized difference - Non-hospitalized and Historical control</b> | <b>Absolute standardized difference - Hospitalized and Historical control</b> | <b>Absolute standardized difference - Admitted to intensive care and Historical control</b> |
|-------------------------------------------------------|-------------------------------------|--------------------------------|---------------------------------------------|-----------------------------------------|-----------------------------------------------------------------------------------|-------------------------------------------------------------------------------|---------------------------------------------------------------------------------------------|
| <b>Age, mean (std), yr</b>                            | 60.23 (15.72)                       | 68.38 (13.38)                  | 68.95 (12.03)                               | 62.90 (16.48)                           | 0.17                                                                              | 0.37                                                                          | 0.42                                                                                        |
| <b>Race, no. (%)</b>                                  |                                     |                                |                                             |                                         |                                                                                   |                                                                               |                                                                                             |
| White                                                 | 95,035 (72.21)                      | 10,585 (63.16)                 | 3,358 (62.32)                               | 4,532,542 (77.36)                       | 0.12                                                                              | 0.31                                                                          | 0.33                                                                                        |
| Black                                                 | 30,166 (22.92)                      | 5,228 (31.19)                  | 1,719 (31.90)                               | 1,051,656 (17.95)                       | 0.12                                                                              | 0.31                                                                          | 0.33                                                                                        |
| Other                                                 | 6,411 (4.87)                        | 947 (5.65)                     | 311 (5.77)                                  | 275,213 (4.70)                          | 0.01                                                                              | 0.04                                                                          | 0.05                                                                                        |
| <b>Sex, no. (%)</b>                                   |                                     |                                |                                             |                                         |                                                                                   |                                                                               |                                                                                             |
| Male                                                  | 116,032 (88.16)                     | 15,774 (94.12)                 | 5,106 (94.77)                               | 5,308,854 (90.60)                       | 0.08                                                                              | 0.13                                                                          | 0.16                                                                                        |
| Female                                                | 15,580 (11.84)                      | 986 (5.88)                     | 282 (5.23)                                  | 550,557 (9.40)                          | 0.08                                                                              | 0.13                                                                          | 0.16                                                                                        |
| <b>BMI category, no. (%), kg/m<sup>2</sup></b>        |                                     |                                |                                             |                                         |                                                                                   |                                                                               |                                                                                             |
| BMI ≤ 25                                              | 17,581 (13.36)                      | 3,571 (21.31)                  | 1,040 (19.30)                               | 1,162,294 (19.84)                       | 0.17                                                                              | 0.04                                                                          | 0.01                                                                                        |
| 25 < BMI ≤ 30                                         | 42,041 (31.94)                      | 5,134 (30.63)                  | 1,611 (29.90)                               | 2,296,904 (39.20)                       | 0.15                                                                              | 0.18                                                                          | 0.20                                                                                        |
| BMI > 30                                              | 71,990 (54.70)                      | 8,055 (48.06)                  | 2,737 (50.80)                               | 2,400,213 (40.96)                       | 0.28                                                                              | 0.14                                                                          | 0.20                                                                                        |
| <b>Smoking status, no. (%)</b>                        |                                     |                                |                                             |                                         |                                                                                   |                                                                               |                                                                                             |
| Never                                                 | 59,811 (45.45)                      | 7,140 (42.60)                  | 2,176 (40.39)                               | 3,086,138 (52.67)                       | 0.14                                                                              | 0.20                                                                          | 0.25                                                                                        |
| Former                                                | 51,871 (39.41)                      | 6,844 (40.84)                  | 2,369 (43.97)                               | 1,444,066 (24.65)                       | 0.32                                                                              | 0.35                                                                          | 0.42                                                                                        |
| Current                                               | 19,930 (15.14)                      | 2,776 (16.56)                  | 843 (15.65)                                 | 1,329,207 (22.69)                       | 0.19                                                                              | 0.15                                                                          | 0.18                                                                                        |
| <b>Area Deprivation Index<sup>*</sup>, mean (std)</b> | 55.63 (18.55)                       | 53.13 (18.70)                  | 54.62 (18.63)                               | 54.62 (19.13)                           | 0.05                                                                              | 0.08                                                                          | 0.00                                                                                        |
| <b>Clinical Characteristics</b>                       |                                     |                                |                                             |                                         |                                                                                   |                                                                               |                                                                                             |
| <b>Outpatient encounter<sup>†</sup>, no. (%)</b>      |                                     |                                |                                             |                                         |                                                                                   |                                                                               |                                                                                             |
| Zero                                                  | 3,909 (2.97)                        | 185 (1.10)                     | 62 (1.15)                                   | 654,793 (11.18)                         | 0.32                                                                              | 0.43                                                                          | 0.43                                                                                        |
| One                                                   | 24,764 (18.82)                      | 1,311 (7.82)                   | 408 (7.57)                                  | 1,775,335 (30.30)                       | 0.27                                                                              | 0.60                                                                          | 0.61                                                                                        |
| Two or more                                           | 102,939 (78.21)                     | 15,264 (91.07)                 | 4,918 (91.28)                               | 3,429,283 (58.53)                       | 0.43                                                                              | 0.81                                                                          | 0.82                                                                                        |

|                                                                                                                                                                                                                                                                                                      |                |                |                |                   |      |      |      |
|------------------------------------------------------------------------------------------------------------------------------------------------------------------------------------------------------------------------------------------------------------------------------------------------------|----------------|----------------|----------------|-------------------|------|------|------|
| <b>Long-term care, no. (%)</b>                                                                                                                                                                                                                                                                       | 3,884 (2.95)   | 1,726 (10.30)  | 497 (9.22)     | 47,384 (0.81)     | 0.16 | 0.42 | 0.39 |
| <b>eGFR, mean (std), ml/min/1.73m<sup>2</sup></b>                                                                                                                                                                                                                                                    | 79.47 (21.31)  | 68.26 (26.13)  | 65.07 (26.79)  | 79.31 (19.95)     | 0.01 | 0.48 | 0.60 |
| <b>Systolic blood pressure, mean (std), mmHg</b>                                                                                                                                                                                                                                                     | 132.35 (11.69) | 134.38 (11.83) | 134.57 (12.14) | 132.63 (12.63)    | 0.02 | 0.14 | 0.16 |
| <b>Diastolic blood pressure, mean (std), mmHg</b>                                                                                                                                                                                                                                                    | 78.54 (7.37)   | 77.06 (7.46)   | 76.99 (7.73)   | 77.53 (7.91)      | 0.13 | 0.06 | 0.07 |
| <b>Cancer, no. (%)</b>                                                                                                                                                                                                                                                                               | 9,315 (7.08)   | 2,411 (14.39)  | 798 (14.81)    | 345,608 (5.90)    | 0.05 | 0.28 | 0.30 |
| <b>Chronic kidney disease, no. (%)</b>                                                                                                                                                                                                                                                               | 21,928 (16.66) | 5,946 (35.48)  | 2,135 (39.63)  | 902,029 (15.40)   | 0.03 | 0.47 | 0.56 |
| <b>Chronic lung disease, no. (%)</b>                                                                                                                                                                                                                                                                 | 17,740 (13.48) | 4,208 (25.11)  | 1,521 (28.23)  | 652,107 (11.13)   | 0.07 | 0.37 | 0.44 |
| <b>Dementia, no. (%)</b>                                                                                                                                                                                                                                                                             | 6,344 (4.82)   | 2,472 (14.75)  | 681 (12.64)    | 191,866 (3.27)    | 0.08 | 0.41 | 0.35 |
| <b>Diabetes mellitus type 2, no. (%)</b>                                                                                                                                                                                                                                                             | 39,029 (29.66) | 7,689 (45.88)  | 2,689 (49.91)  | 1,330,448 (22.71) | 0.16 | 0.50 | 0.59 |
| <b>Dysautonomia, no. (%)</b>                                                                                                                                                                                                                                                                         | 2,120 (1.61)   | 525 (3.13)     | 167 (3.10)     | 72,975 (1.25)     | 0.03 | 0.13 | 0.13 |
| <b>Hyperlipidemia, no. (%)</b>                                                                                                                                                                                                                                                                       | 44,815 (34.05) | 5,535 (33.03)  | 1,877 (34.84)  | 1,810,965 (30.91) | 0.07 | 0.05 | 0.08 |
| <b>Hypertension, no. (%)</b>                                                                                                                                                                                                                                                                         | 34,060 (25.88) | 5,290 (31.56)  | 1,710 (31.74)  | 1,540,087 (26.28) | 0.01 | 0.12 | 0.12 |
| <p>*. Area Deprivation Index is a measure of socioeconomic disadvantage, with a range from low to high disadvantage of 0 to 100.<br/> †. Data collected within one year before cohort enrollment<br/> std, standard deviation; BMI, body mass index; eGFR, estimated glomerular filtration rate.</p> |                |                |                |                   |      |      |      |

**Supplementary Table 13. Demographic and health characteristics of the COVID-19 and historical cohorts by care setting of the acute infection after weighting**

| <b>Baseline Characteristics</b>                  | <b>Non-hospitalized (N=131,612)</b> | <b>Hospitalized (N=16,760)</b> | <b>Admitted to intensive care (N=5,388)</b> | <b>Historical control (N=5,859,411)</b> | <b>Absolute standardized difference - Non-hospitalized and Historical control</b> | <b>Absolute standardized difference - Hospitalized and Historical control</b> | <b>Absolute standardized difference - Admitted to intensive care and Historical control</b> |
|--------------------------------------------------|-------------------------------------|--------------------------------|---------------------------------------------|-----------------------------------------|-----------------------------------------------------------------------------------|-------------------------------------------------------------------------------|---------------------------------------------------------------------------------------------|
| <b>Age, mean (std), yr</b>                       | 63.06 (16.29)                       | 63.21 (15.88)                  | 63.46 (16.07)                               | 63.32 (16.30)                           | 0.02                                                                              | 0.01                                                                          | 0.01                                                                                        |
| <b>Race, no. (%)</b>                             |                                     |                                |                                             |                                         |                                                                                   |                                                                               |                                                                                             |
| White                                            | 99,846 (75.86)                      | 12,406 (74.02)                 | 3,951 (73.33)                               | 4,485,028 (76.54)                       | 0.02                                                                              | 0.06                                                                          | 0.07                                                                                        |
| Black                                            | 25,339 (19.25)                      | 3,512 (20.96)                  | 1,073 (19.92)                               | 1,094,538 (18.68)                       | 0.01                                                                              | 0.06                                                                          | 0.03                                                                                        |
| Other                                            | 6,427 (4.88)                        | 842 (5.02)                     | 364 (6.75)                                  | 279,904 (4.78)                          | 0.00                                                                              | 0.01                                                                          | 0.08                                                                                        |
| <b>Sex, no. (%)</b>                              |                                     |                                |                                             |                                         |                                                                                   |                                                                               |                                                                                             |
| Male                                             | 118,151 (89.77)                     | 15,285 (91.20)                 | 4,982 (92.46)                               | 5,285,657 (90.21)                       | 0.01                                                                              | 0.03                                                                          | 0.08                                                                                        |
| Female                                           | 13,461 (10.23)                      | 1,475 (8.80)                   | 406 (7.54)                                  | 573,754 (9.79)                          | 0.01                                                                              | 0.03                                                                          | 0.08                                                                                        |
| <b>BMI category, no. (%), kg/m<sup>2</sup></b>   |                                     |                                |                                             |                                         |                                                                                   |                                                                               |                                                                                             |
| BMI ≤ 25                                         | 25,091 (19.06)                      | 3,299 (19.68)                  | 965 (17.91)                                 | 1,138,015 (19.42)                       | 0.01                                                                              | 0.01                                                                          | 0.04                                                                                        |
| 25 < BMI ≤ 30                                    | 47,358 (35.98)                      | 5,713 (34.09)                  | 1,917 (35.57)                               | 2,247,787 (38.36)                       | 0.05                                                                              | 0.09                                                                          | 0.06                                                                                        |
| BMI > 30                                         | 59,164 (44.95)                      | 7,748 (46.23)                  | 2,506 (46.52)                               | 2,473,609 (42.22)                       | 0.06                                                                              | 0.08                                                                          | 0.09                                                                                        |
| <b>Smoking status, no. (%)</b>                   |                                     |                                |                                             |                                         |                                                                                   |                                                                               |                                                                                             |
| Never                                            | 54,307 (41.26)                      | 6,714 (40.06)                  | 2,236 (41.50)                               | 2,501,968 (42.70)                       | 0.03                                                                              | 0.05                                                                          | 0.02                                                                                        |
| Former                                           | 48,812 (37.09)                      | 5,972 (35.63)                  | 1,963 (36.43)                               | 2,111,732 (36.04)                       | 0.02                                                                              | 0.01                                                                          | 0.01                                                                                        |
| Current                                          | 28,493 (21.65)                      | 4,073 (24.30)                  | 1,189 (22.07)                               | 1,245,711 (21.26)                       | 0.01                                                                              | 0.07                                                                          | 0.02                                                                                        |
| <b>Area Deprivation Index*, mean (std)</b>       | 54.95 (18.93)                       | 55.04 (19.30)                  | 55.96 (19.24)                               | 54.65 (19.03)                           | 0.02                                                                              | 0.02                                                                          | 0.07                                                                                        |
| <b>Clinical Characteristics</b>                  |                                     |                                |                                             |                                         |                                                                                   |                                                                               |                                                                                             |
| <b>Outpatient encounter<sup>†</sup>, no. (%)</b> |                                     |                                |                                             |                                         |                                                                                   |                                                                               |                                                                                             |
| Zero                                             | 15,124 (11.49)                      | 1,664 (9.93)                   | 464 (8.62)                                  | 671,078 (11.45)                         | 0.00                                                                              | 0.05                                                                          | 0.09                                                                                        |
| One                                              | 40,762 (30.97)                      | 5,617 (33.51)                  | 1,910 (35.45)                               | 1,834,582 (31.31)                       | 0.01                                                                              | 0.05                                                                          | 0.09                                                                                        |
| Two or more                                      | 75,728 (57.54)                      | 9,479 (56.56)                  | 3,014 (55.93)                               | 3,353,751 (57.24)                       | 0.01                                                                              | 0.01                                                                          | 0.03                                                                                        |
| <b>Long-term care, no. (%)</b>                   | 1,191 (0.91)                        | 240 (1.43)                     | 87 (1.61)                                   | 41,485 (0.71)                           | 0.02                                                                              | 0.07                                                                          | 0.08                                                                                        |

|                                                   |                |                |                |                   |      |      |      |
|---------------------------------------------------|----------------|----------------|----------------|-------------------|------|------|------|
| <b>eGFR, mean (std), ml/min/1.73m<sup>2</sup></b> | 78.55 (20.59)  | 77.93 (21.54)  | 77.72 (21.68)  | 78.63 (20.31)     | 0.00 | 0.03 | 0.04 |
| <b>Systolic blood pressure, mean (std), mmHg</b>  | 132.58 (12.42) | 133.18 (12.41) | 134.03 (12.22) | 132.61 (12.33)    | 0.01 | 0.05 | 0.12 |
| <b>Diastolic blood pressure, mean (std), mmHg</b> | 77.82 (7.62)   | 78.22 (7.61)   | 78.30 (7.71)   | 77.80 (7.56)      | 0.00 | 0.06 | 0.07 |
| <b>Cancer, no. (%)</b>                            | 8,092 (6.15)   | 1,193 (7.12)   | 370 (6.87)     | 337,912 (5.77)    | 0.02 | 0.06 | 0.05 |
| <b>Chronic kidney disease, no. (%)</b>            | 22,753 (17.29) | 3,175 (18.94)  | 1,037 (19.24)  | 978,404 (16.70)   | 0.02 | 0.06 | 0.07 |
| <b>Chronic lung disease, no. (%)</b>              | 14,908 (11.33) | 2,071 (12.36)  | 639 (11.87)    | 641,898 (10.96)   | 0.01 | 0.04 | 0.03 |
| <b>Dementia, no. (%)</b>                          | 4,445 (3.38)   | 765 (4.56)     | 254 (4.72)     | 185,919 (3.17)    | 0.01 | 0.07 | 0.08 |
| <b>Diabetes mellitus type 2, no. (%)</b>          | 30,642 (23.28) | 4,359 (26.01)  | 1,474 (27.35)  | 1,337,411 (22.83) | 0.01 | 0.07 | 0.10 |
| <b>Dysautonomia, no. (%)</b>                      | 1,683 (1.28)   | 226 (1.35)     | 81 (1.50)      | 71,778 (1.23)     | 0.00 | 0.01 | 0.02 |
| <b>Hyperlipidemia, no. (%)</b>                    | 34,823 (26.46) | 4,454 (26.58)  | 1,447 (26.86)  | 1,512,841 (25.82) | 0.01 | 0.02 | 0.02 |
| <b>Hypertension, no. (%)</b>                      | 35,235 (26.77) | 4,885 (29.15)  | 1,663 (30.87)  | 1,541,377 (26.31) | 0.01 | 0.06 | 0.10 |

\*. Area Deprivation Index is a measure of socioeconomic disadvantage, with a range from low to high disadvantage of 0 to 100.

†. Data collected within one year before cohort enrollment

std, standard deviation; BMI, body mass index; eGFR, estimated glomerular filtration rate.

**Supplementary Table 14. Risks and 12-month burdens of incident post-acute COVID-19 cardiovascular outcomes by care setting of the acute infection compared to historical control**

| Outcome*               | Care setting†              | Hazard ratio (95% CI) ‡ | COVID-19 burden per 1000 persons at 12 months (95% CI) ‡ | Historical control burden per 1000 persons at 12 months (95% CI) ‡ | Burden difference per 1000 persons at 12 months (95% CI) ‡ |
|------------------------|----------------------------|-------------------------|----------------------------------------------------------|--------------------------------------------------------------------|------------------------------------------------------------|
| <b>Cerebrovascular</b> | Non-hospitalized           | 1.26 (1.19, 1.34)       | 13.79 (13.03, 14.60)                                     | 10.95<br>(10.86, 11.04)                                            | 2.84 (2.08, 3.65)                                          |
|                        | Hospitalized               | 2.85 (2.46, 3.29)       | 30.85 (26.77, 35.53)                                     |                                                                    | 19.90 (15.82, 24.58)                                       |
|                        | Admitted to intensive care | 3.90 (3.10, 4.89)       | 42.01 (33.60, 52.46)                                     |                                                                    | 31.06 (22.65, 41.51)                                       |
| Stroke                 | Non-hospitalized           | 1.21 (1.13, 1.30)       | 9.79 (9.15, 10.48)                                       | 8.10<br>(8.02, 8.17)                                               | 1.69 (1.05, 2.38)                                          |
|                        | Hospitalized               | 3.00 (2.55, 3.52)       | 24.08 (20.54, 28.22)                                     |                                                                    | 15.98 (12.44, 20.12)                                       |
|                        | Admitted to intensive care | 4.26 (3.31, 5.48)       | 34.06 (26.58, 43.60)                                     |                                                                    | 25.96 (18.48, 35.50)                                       |
| TIA                    | Non-hospitalized           | 1.28 (1.17, 1.40)       | 5.09 (4.65, 5.57)                                        | 3.99<br>(3.94, 4.04)                                               | 1.11 (0.67, 1.59)                                          |
|                        | Hospitalized               | 2.35 (1.85, 2.98)       | 9.34 (7.36, 11.84)                                       |                                                                    | 5.35 (3.38, 7.85)                                          |
|                        | Admitted to intensive care | 2.69 (1.80, 4.03)       | 10.69 (7.16, 15.96)                                      |                                                                    | 6.71 (3.17, 11.97)                                         |
| <b>Dysrhythmia</b>     | Non-hospitalized           | 1.24 (1.20, 1.28)       | 39.36 (38.06, 40.70)                                     | 31.92<br>(31.77, 32.07)                                            | 7.44 (6.14, 8.79)                                          |
|                        | Hospitalized               | 3.61 (3.29, 3.96)       | 110.50 (101.23, 120.55)                                  |                                                                    | 78.58 (69.32, 88.63)                                       |
|                        | Admitted to intensive care | 7.35 (6.49, 8.33)       | 212.25 (189.94, 236.78)                                  |                                                                    | 180.33 (158.03, 204.85)                                    |
| Atrial fibrillation    | Non-hospitalized           | 1.25 (1.19, 1.31)       | 20.33 (19.35, 21.35)                                     | 16.29<br>(16.19, 16.40)                                            | 4.03 (3.06, 5.06)                                          |
|                        | Hospitalized               | 3.73 (3.27, 4.27)       | 59.50 (52.23, 67.74)                                     |                                                                    | 43.20 (35.94, 51.45)                                       |
|                        | Admitted to intensive care | 7.29 (6.20, 8.56)       | 112.79 (96.83, 131.17)                                   |                                                                    | 96.49 (80.55, 114.87)                                      |
| Sinus tachycardia      | Non-hospitalized           | 1.28 (1.20, 1.36)       | 9.48 (8.90, 10.10)                                       | 7.42<br>(7.35, 7.49)                                               | 2.06 (1.48, 2.68)                                          |
|                        | Hospitalized               | 4.71 (4.06, 5.46)       | 34.45 (29.76, 39.86)                                     |                                                                    | 27.03 (22.34, 32.44)                                       |
|                        | Admitted to intensive care | 9.70 (7.82, 12.03)      | 69.71 (56.59, 85.72)                                     |                                                                    | 62.28 (49.17, 78.30)                                       |
| Sinus bradycardia      | Non-hospitalized           | 1.13 (1.07, 1.20)       | 10.97 (10.35, 11.62)                                     | 9.69<br>(9.61, 9.77)                                               | 1.27 (0.66, 1.93)                                          |
|                        | Hospitalized               | 2.48 (2.12, 2.89)       | 23.82 (20.46, 27.72)                                     |                                                                    | 14.13 (10.77, 18.03)                                       |
|                        | Admitted to intensive care | 4.22 (3.38, 5.29)       | 40.31 (32.35, 50.17)                                     |                                                                    | 30.62 (22.66, 40.48)                                       |
| Ventricular arrhythmia | Non-hospitalized           | 1.42 (1.32, 1.54)       | 6.89 (6.38, 7.44)                                        | 4.85<br>(4.80, 4.91)                                               | 2.04 (1.53, 2.59)                                          |
|                        | Hospitalized               | 4.09 (3.32, 5.05)       | 19.71 (16.01, 24.25)                                     |                                                                    | 14.85 (11.16, 19.39)                                       |
|                        | Admitted to intensive care | 8.53 (6.63, 10.98)      | 40.67 (31.74, 52.03)                                     |                                                                    | 35.81 (26.90, 47.16)                                       |
| Atrial flutter         | Non-hospitalized           | 1.34 (1.21, 1.47)       | 5.31 (4.81, 5.85)                                        |                                                                    | 1.33 (0.84, 1.87)                                          |

|                                   |                            |                       |                         |                         |                       |
|-----------------------------------|----------------------------|-----------------------|-------------------------|-------------------------|-----------------------|
|                                   | Hospitalized               | 3.55 (2.79, 4.51)     | 14.04 (11.05, 17.83)    | 3.98<br>(3.93, 4.03)    | 10.06 (7.08, 13.85)   |
|                                   | Admitted to intensive care | 8.38 (6.49, 10.84)    | 32.86 (25.51, 42.28)    |                         | 28.88 (21.54, 38.30)  |
| <b>Inflammatory heart disease</b> | Non-hospitalized           | 1.56 (1.33, 1.83)     | 1.86 (1.59, 2.19)       | 1.20<br>(1.17, 1.22)    | 0.67 (0.39, 0.99)     |
|                                   | Hospitalized               | 5.96 (4.19, 8.49)     | 7.11 (5.00, 10.11)      |                         | 5.91 (3.80, 8.91)     |
|                                   | Admitted to intensive care | 10.28 (5.87, 17.98)   | 12.22 (7.01, 21.29)     |                         | 11.03 (5.82, 20.08)   |
| Pericarditis                      | Non-hospitalized           | 1.41 (1.19, 1.67)     | 1.64 (1.39, 1.94)       | 1.16<br>(1.14, 1.19)    | 0.48 (0.22, 0.78)     |
|                                   | Hospitalized               | 5.44 (3.68, 8.06)     | 6.32 (4.27, 9.34)       |                         | 5.15 (3.11, 8.18)     |
|                                   | Admitted to intensive care | 9.67 (5.27, 17.76)    | 11.2 (6.12, 20.47)      |                         | 10.04 (4.96, 19.30)   |
| Myocarditis                       | Non-hospitalized           | 5.67 (3.65, 8.81)     | 0.25 (0.16, 0.39)       | 0.04<br>(0.04, 0.05)    | 0.21 (0.12, 0.34)     |
|                                   | Hospitalized               | 19.82 (11.73, 33.48)  | 0.88 (0.52, 1.48)       |                         | 0.83 (0.48, 1.43)     |
|                                   | Admitted to intensive care | 58.11 (22.08, 152.93) | 2.57 (0.98, 6.74)       |                         | 2.52 (0.94, 6.67)     |
| <b>Ischemic heart disease</b>     | Non-hospitalized           | 1.14 (1.08, 1.20)     | 14.14 (13.42, 14.90)    | 12.38<br>(12.29, 12.47) | 1.76 (1.04, 2.52)     |
|                                   | Hospitalized               | 3.46 (2.98, 4.00)     | 42.13 (36.47, 48.66)    |                         | 29.75 (24.09, 36.27)  |
|                                   | Admitted to intensive care | 5.19 (4.37, 6.17)     | 62.65 (52.97, 74.03)    |                         | 50.27 (40.59, 61.65)  |
| Acute coronary disease            | Non-hospitalized           | 1.16 (1.08, 1.24)     | 8.78 (8.21, 9.40)       | 7.60<br>(7.53, 7.67)    | 1.19 (0.61, 1.80)     |
|                                   | Hospitalized               | 3.93 (3.28, 4.72)     | 29.53 (24.67, 35.33)    |                         | 21.93 (17.08, 27.73)  |
|                                   | Admitted to intensive care | 7.04 (5.87, 8.44)     | 52.27 (43.77, 62.36)    |                         | 44.67 (36.18, 54.75)  |
| Myocardial infarction             | Non-hospitalized           | 1.14 (1.04, 1.25)     | 5.12 (4.68, 5.59)       | 4.49<br>(4.44, 4.55)    | 0.62 (0.19, 1.10)     |
|                                   | Hospitalized               | 4.58 (3.59, 5.85)     | 20.42 (16.03, 25.99)    |                         | 15.93 (11.54, 21.49)  |
|                                   | Admitted to intensive care | 8.44 (6.82, 10.44)    | 37.27 (30.23, 45.90)    |                         | 32.78 (25.75, 41.40)  |
| Ischemic cardiomyopathy           | Non-hospitalized           | 1.09 (0.98, 1.21)     | 3.83 (3.45, 4.24)       | 3.52<br>(3.47, 3.57)    | 0.31 (-0.07, 0.73)    |
|                                   | Hospitalized               | 3.10 (2.17, 4.43)     | 10.88 (7.63, 15.49)     |                         | 7.36 (4.12, 11.97)    |
|                                   | Admitted to intensive care | 3.92 (2.85, 5.38)     | 13.71 (10.00, 18.77)    |                         | 10.19 (6.48, 15.25)   |
| Angina                            | Non-hospitalized           | 1.13 (1.05, 1.22)     | 6.82 (6.33, 7.34)       | 6.02<br>(5.96, 6.09)    | 0.79 (0.30, 1.32)     |
|                                   | Hospitalized               | 2.71 (2.21, 3.33)     | 16.24 (13.24, 19.91)    |                         | 10.22 (7.22, 13.88)   |
|                                   | Admitted to intensive care | 2.34 (1.62, 3.37)     | 14.03 (9.77, 20.14)     |                         | 8.01 (3.74, 14.11)    |
| <b>Other cardiac disorders</b>    | Non-hospitalized           | 1.27 (1.21, 1.32)     | 24.59 (23.53, 25.7)     | 19.47<br>(19.36, 19.58) | 5.12 (4.06, 6.22)     |
|                                   | Hospitalized               | 3.65 (3.25, 4.09)     | 69.19 (61.95, 77.24)    |                         | 49.72 (42.48, 57.77)  |
|                                   | Admitted to intensive care | 6.38 (5.50, 7.41)     | 117.93 (102.49, 135.52) |                         | 98.46 (83.03, 116.04) |
| Heart failure                     | Non-hospitalized           | 1.26 (1.20, 1.32)     | 22.52 (21.50, 23.59)    | 17.92<br>(17.81, 18.03) | 4.60 (3.58, 5.67)     |
|                                   | Hospitalized               | 3.61 (3.21, 4.07)     | 63.27 (56.43, 70.90)    |                         | 45.34 (38.51, 52.97)  |
|                                   | Admitted to intensive care | 5.56 (4.76, 6.50)     | 95.67 (82.44, 110.90)   |                         | 77.75 (64.52, 92.97)  |
| Non-ischemic cardiomyopathy       | Non-hospitalized           | 1.22 (1.13, 1.31)     | 7.56 (7.03, 8.13)       |                         | 1.35 (0.82, 1.91)     |
|                                   | Hospitalized               | 2.98 (2.47, 3.60)     | 18.4 (15.27, 22.16)     |                         | 12.19 (9.06, 15.95)   |



|                             |                            |                      |                         |                         |                         |
|-----------------------------|----------------------------|----------------------|-------------------------|-------------------------|-------------------------|
|                             | Admitted to intensive care | 5.74 (4.39, 7.51)    | 35.15 (26.99, 45.73)    | 6.21<br>(6.15, 6.28)    | 28.94 (20.78, 39.51)    |
| Cardiac arrest              | Non-hospitalized           | 0.94 (0.73, 1.20)    | 0.46 (0.36, 0.60)       | 0.49<br>(0.48, 0.51)    | -0.03 (-0.13, 0.1)      |
|                             | Hospitalized               | 5.77 (3.84, 8.68)    | 2.85 (1.90, 4.28)       |                         | 2.36 (1.40, 3.79)       |
|                             | Admitted to intensive care | 30.53 (20.68, 45.07) | 14.99 (10.18, 22.06)    |                         | 14.5 (9.69, 21.55)      |
| Cardiogenic shock           | Non-hospitalized           | 1.20 (0.81, 1.77)    | 0.41 (0.28, 0.61)       | 0.34<br>(0.33, 0.36)    | 0.07 (-0.07, 0.26)      |
|                             | Hospitalized               | 5.50 (3.14, 9.62)    | 1.87 (1.07, 3.28)       |                         | 1.53 (0.73, 2.94)       |
|                             | Admitted to intensive care | 18.28 (12.37, 27.03) | 6.22 (4.21, 9.19)       |                         | 5.88 (3.87, 8.84)       |
| Thrombotic disorders        | Non-hospitalized           | 1.94 (1.83, 2.05)    | 12.56 (11.86, 13.31)    | 6.50<br>(6.43, 6.57)    | 6.06 (5.36, 6.81)       |
|                             | Hospitalized               | 7.29 (6.42, 8.29)    | 46.44 (40.98, 52.61)    |                         | 39.94 (34.48, 46.11)    |
|                             | Admitted to intensive care | 16.20 (13.72, 19.12) | 100.24 (85.60, 117.21)  |                         | 93.74 (79.11, 110.70)   |
| Pulmonary embolism          | Non-hospitalized           | 2.55 (2.34, 2.78)    | 5.78 (5.30, 6.29)       | 2.27<br>(2.23, 2.31)    | 3.51 (3.04, 4.02)       |
|                             | Hospitalized               | 11.98 (10.28, 13.96) | 26.83 (23.07, 31.19)    |                         | 24.56 (20.82, 28.91)    |
|                             | Admitted to intensive care | 27.61 (22.10, 34.50) | 60.76 (48.93, 75.32)    |                         | 58.49 (46.68, 73.04)    |
| Deep vein thrombosis        | Non-hospitalized           | 1.69 (1.55, 1.83)    | 6.31 (5.81, 6.85)       | 3.75<br>(3.70, 3.80)    | 2.56 (2.07, 3.10)       |
|                             | Hospitalized               | 4.61 (3.66, 5.81)    | 17.17 (13.65, 21.58)    |                         | 13.42 (9.90, 17.83)     |
|                             | Admitted to intensive care | 9.80 (7.59, 12.64)   | 36.14 (28.12, 46.40)    |                         | 32.39 (24.38, 42.64)    |
| Superficial vein thrombosis | Non-hospitalized           | 1.47 (1.34, 1.63)    | 3.82 (3.46, 4.21)       | 2.59<br>(2.55, 2.63)    | 1.22 (0.87, 1.62)       |
|                             | Hospitalized               | 4.80 (3.92, 5.87)    | 12.37 (10.12, 15.12)    |                         | 9.78 (7.53, 12.53)      |
|                             | Admitted to intensive care | 11.05 (8.56, 14.27)  | 28.27 (21.96, 36.36)    |                         | 25.68 (19.38, 33.76)    |
| MACE                        | Non-hospitalized           | 1.30 (1.26, 1.35)    | 56.12 (54.27, 58.04)    | 43.39<br>(43.22, 43.56) | 12.73 (10.88, 14.65)    |
|                             | Hospitalized               | 2.50 (2.29, 2.72)    | 104.81 (96.50, 113.80)  |                         | 61.42 (53.11, 70.40)    |
|                             | Admitted to intensive care | 4.51 (4.01, 5.08)    | 181.32 (162.78, 201.71) |                         | 137.93 (119.40, 158.31) |
| Any cardiovascular outcome  | Non-hospitalized           | 1.35 (1.32, 1.38)    | 105.38 (102.93, 107.88) | 79.21<br>(78.98, 79.45) | 26.16 (23.72, 28.66)    |
|                             | Hospitalized               | 3.32 (3.11, 3.55)    | 239.78 (226.33, 253.90) |                         | 160.57 (147.12, 174.68) |
|                             | Admitted to intensive care | 6.00 (5.44, 6.63)    | 390.73 (361.70, 421.24) |                         | 311.52 (282.49, 342.02) |

\*. Outcomes were ascertained from day 30 after the initial positive COVID-19 test result until end of follow up.

†. Based on care received within the first 30 days after a positive COVID-19 test result.

‡. Adjustment through inverse probability weighting using predefined variables and algorithmically selected high-dimensional variables.

CI, confidence interval; TIA, transient ischemic attack; MACE, major adverse cardiac events.

**Supplementary Table 15. Difference-in-differences analyses of incident rate ratios of cardiovascular outcomes before and after exposure to COVID-19 compared to contemporary control**

| Outcome*                          | Incident rate ratio of COVID-19 compared to contemporary control (95% CI) <sup>†</sup> |                               | Ratio of incident rate ratios of post/pre COVID-19 exposure periods (95% CI) <sup>‡</sup> |
|-----------------------------------|----------------------------------------------------------------------------------------|-------------------------------|-------------------------------------------------------------------------------------------|
|                                   | Pre-COVID-19 exposure period                                                           | Post-COVID-19 exposure period |                                                                                           |
| <b>Cerebrovascular</b>            | 1.00 (0.95, 1.05)                                                                      | 1.50 (1.42, 1.58)             | 1.49 (1.39, 1.62)                                                                         |
| Stroke                            | 1.00 (0.94, 1.06)                                                                      | 1.48 (1.40, 1.59)             | 1.48 (1.36, 1.63)                                                                         |
| TIA                               | 1.01 (0.93, 1.07)                                                                      | 1.43 (1.32, 1.57)             | 1.43 (1.29, 1.60)                                                                         |
| <b>Dysrhythmia</b>                | 1.00 (0.97, 1.03)                                                                      | 1.68 (1.61, 1.77)             | 1.68 (1.59, 1.78)                                                                         |
| Atrial fibrillation               | 1.00 (0.95, 1.05)                                                                      | 1.65 (1.58, 1.73)             | 1.65 (1.55, 1.77)                                                                         |
| Sinus tachycardia                 | 1.00 (0.94, 1.06)                                                                      | 1.83 (1.73, 1.95)             | 1.83 (1.69, 1.99)                                                                         |
| Sinus bradycardia                 | 1.00 (0.96, 1.05)                                                                      | 1.52 (1.44, 1.61)             | 1.51 (1.41, 1.63)                                                                         |
| Ventricular arrhythmia            | 1.00 (0.93, 1.07)                                                                      | 1.95 (1.64, 2.37)             | 1.95 (1.62, 2.40)                                                                         |
| Atrial flutter                    | 1.00 (0.93, 1.07)                                                                      | 1.75 (1.62, 1.91)             | 1.75 (1.58, 1.95)                                                                         |
| <b>Inflammatory heart disease</b> | 1.00 (0.88, 1.12)                                                                      | 1.99 (1.75, 2.29)             | 1.99 (1.69, 2.40)                                                                         |
| Pericarditis                      | 1.00 (0.88, 1.12)                                                                      | 1.83 (1.60, 2.13)             | 1.83 (1.54, 2.22)                                                                         |
| Myocarditis                       | 1.03 (0.58, 1.69)                                                                      | 5.32 (3.78, 7.66)             | 5.21 (2.83, 10.05)                                                                        |
| <b>Ischemic heart disease</b>     | 1.00 (0.95, 1.05)                                                                      | 1.61 (1.49, 1.77)             | 1.61 (1.47, 1.79)                                                                         |
| Acute coronary disease            | 1.00 (0.94, 1.06)                                                                      | 1.68 (1.52, 1.87)             | 1.68 (1.50, 1.90)                                                                         |
| Myocardial infarction             | 1.01 (0.93, 1.08)                                                                      | 1.58 (1.47, 1.72)             | 1.58 (1.43, 1.76)                                                                         |
| Ischemic cardiomyopathy           | 1.00 (0.92, 1.08)                                                                      | 1.70 (1.41, 2.10)             | 1.70 (1.39, 2.12)                                                                         |
| Angina                            | 1.00 (0.94, 1.06)                                                                      | 1.48 (1.38, 1.60)             | 1.48 (1.36, 1.64)                                                                         |
| <b>Other cardiac disorders</b>    | 1.00 (0.96, 1.04)                                                                      | 1.71 (1.64, 1.78)             | 1.71 (1.61, 1.81)                                                                         |
| Heart failure                     | 1.00 (0.96, 1.04)                                                                      | 1.71 (1.64, 1.79)             | 1.71 (1.61, 1.82)                                                                         |
| Non-ischemic cardiomyopathy       | 1.00 (0.94, 1.06)                                                                      | 1.60 (1.50, 1.72)             | 1.60 (1.47, 1.75)                                                                         |
| Cardiac arrest                    | 1.03 (0.67, 1.50)                                                                      | 2.55 (2.04, 3.28)             | 2.49 (1.60, 4.01)                                                                         |
| Cardiogenic shock                 | 1.01 (0.70, 1.42)                                                                      | 2.36 (1.83, 3.15)             | 2.34 (1.54, 3.69)                                                                         |
| <b>Thrombotic disorders</b>       | 1.00 (0.95, 1.05)                                                                      | 2.34 (2.22, 2.47)             | 2.34 (2.18, 2.52)                                                                         |
| Pulmonary embolism                | 1.02 (0.92, 1.12)                                                                      | 2.88 (2.68, 3.10)             | 2.82 (2.51, 3.20)                                                                         |

|                                                                                                                                                                                                                                                                                                                                                                                                                                                                                                                                                                                                 |                   |                   |                   |
|-------------------------------------------------------------------------------------------------------------------------------------------------------------------------------------------------------------------------------------------------------------------------------------------------------------------------------------------------------------------------------------------------------------------------------------------------------------------------------------------------------------------------------------------------------------------------------------------------|-------------------|-------------------|-------------------|
| Deep vein thrombosis                                                                                                                                                                                                                                                                                                                                                                                                                                                                                                                                                                            | 1.02 (0.93, 1.10) | 2.01 (1.87, 2.18) | 1.99 (1.79, 2.22) |
| Superficial vein thrombosis                                                                                                                                                                                                                                                                                                                                                                                                                                                                                                                                                                     | 1.01 (0.91, 1.10) | 1.88 (1.74, 2.05) | 1.87 (1.66, 2.12) |
| <b>MACE</b>                                                                                                                                                                                                                                                                                                                                                                                                                                                                                                                                                                                     | 1.00 (0.95, 1.05) | 1.54 (1.50, 1.59) | 1.54 (1.46, 1.64) |
| <b>Any cardiovascular outcome</b>                                                                                                                                                                                                                                                                                                                                                                                                                                                                                                                                                               | 1.00 (0.97, 1.03) | 1.64 (1.60, 1.69) | 1.64 (1.58, 1.70) |
| <p>*. Outcomes for pre-exposure period were ascertained until day 30 before the initial positive COVID-19 test result. Outcomes for post-exposure period were ascertained from day 30 after the initial positive COVID-19 test result until end of follow up.</p> <p>†. Adjustment through weighting using predefined and algorithmically selected high-dimensional variables during pre-exposure period.</p> <p>‡. Incidence rate ratio in pre-exposure period served as the referent.</p> <p>CI, confidence interval; TIA, transient ischemic attack; MACE, major adverse cardiac events.</p> |                   |                   |                   |

**Supplementary Table 16. Difference-in-differences analyses of incident rate ratios of cardiovascular outcomes before and after exposure to COVID-19 by care setting of the acute infection compared to contemporary control**

| Outcome*               | Care setting <sup>†</sup>  | Incident rate ratio of COVID-19 compared to contemporary control (95% CI) <sup>‡</sup> |                               | Ratio of incident rate ratios of post/pre COVID-19 exposure periods (95% CI) <sup>§</sup> |
|------------------------|----------------------------|----------------------------------------------------------------------------------------|-------------------------------|-------------------------------------------------------------------------------------------|
|                        |                            | Pre-COVID-19 exposure period                                                           | Post-COVID-19 exposure period |                                                                                           |
| Cerebrovascular        | Non-hospitalized           | 1.00 (0.95, 1.05)                                                                      | 1.31 (1.24, 1.39)             | 1.30 (1.21, 1.41)                                                                         |
|                        | Hospitalized               | 1.00 (0.84, 1.17)                                                                      | 2.91 (2.53, 3.38)             | 2.90 (2.37, 3.60)                                                                         |
|                        | Admitted to intensive care | 1.01 (0.75, 1.31)                                                                      | 3.93 (3.14, 4.98)             | 3.91 (2.78, 5.65)                                                                         |
| Stroke                 | Non-hospitalized           | 1.00 (0.94, 1.06)                                                                      | 1.24 (1.17, 1.34)             | 1.24 (1.14, 1.36)                                                                         |
|                        | Hospitalized               | 1.01 (0.82, 1.20)                                                                      | 3.04 (2.61, 3.60)             | 3.04 (2.39, 3.90)                                                                         |
|                        | Admitted to intensive care | 1.01 (0.71, 1.38)                                                                      | 4.28 (3.34, 5.56)             | 4.25 (2.87, 6.51)                                                                         |
| TIA                    | Non-hospitalized           | 1.01 (0.92, 1.09)                                                                      | 1.35 (1.24, 1.48)             | 1.34 (1.20, 1.53)                                                                         |
|                        | Hospitalized               | 1.01 (0.80, 1.22)                                                                      | 2.45 (1.94, 3.13)             | 2.44 (1.83, 3.36)                                                                         |
|                        | Admitted to intensive care | 1.02 (0.68, 1.45)                                                                      | 2.76 (1.86, 4.17)             | 2.72 (1.64, 4.70)                                                                         |
| Dysrhythmia            | Non-hospitalized           | 1.00 (0.96, 1.04)                                                                      | 1.35 (1.31, 1.40)             | 1.35 (1.28, 1.43)                                                                         |
|                        | Hospitalized               | 1.00 (0.88, 1.12)                                                                      | 3.92 (3.57, 4.32)             | 3.91 (3.39, 4.56)                                                                         |
|                        | Admitted to intensive care | 1.01 (0.80, 1.23)                                                                      | 7.96 (7.02, 9.11)             | 7.89 (6.28, 10.34)                                                                        |
| Atrial fibrillation    | Non-hospitalized           | 1.00 (0.94, 1.06)                                                                      | 1.34 (1.28, 1.41)             | 1.34 (1.24, 1.45)                                                                         |
|                        | Hospitalized               | 1.01 (0.85, 1.16)                                                                      | 3.93 (3.45, 4.52)             | 3.92 (3.22, 4.82)                                                                         |
|                        | Admitted to intensive care | 1.01 (0.77, 1.27)                                                                      | 7.58 (6.45, 8.99)             | 7.51 (5.70, 10.31)                                                                        |
| Sinus tachycardia      | Non-hospitalized           | 1.00 (0.94, 1.06)                                                                      | 1.38 (1.30, 1.47)             | 1.38 (1.27, 1.50)                                                                         |
|                        | Hospitalized               | 1.01 (0.81, 1.21)                                                                      | 5.01 (4.35, 5.86)             | 5.00 (3.96, 6.44)                                                                         |
|                        | Admitted to intensive care | 1.01 (0.71, 1.37)                                                                      | 10.24 (8.31, 12.81)           | 10.12 (7.06, 15.34)                                                                       |
| Sinus bradycardia      | Non-hospitalized           | 1.00 (0.95, 1.05)                                                                      | 1.29 (1.22, 1.37)             | 1.29 (1.20, 1.40)                                                                         |
|                        | Hospitalized               | 1.01 (0.80, 1.23)                                                                      | 2.81 (2.42, 3.29)             | 2.79 (2.19, 3.66)                                                                         |
|                        | Admitted to intensive care | 1.01 (0.74, 1.32)                                                                      | 4.77 (3.83, 6.02)             | 4.74 (3.36, 6.89)                                                                         |
| Ventricular arrhythmia | Non-hospitalized           | 1.01 (0.93, 1.08)                                                                      | 1.37 (1.27, 1.49)             | 1.36 (1.23, 1.52)                                                                         |
|                        | Hospitalized               | 1.01 (0.81, 1.21)                                                                      | 3.87 (3.16, 4.81)             | 3.85 (2.96, 5.14)                                                                         |
|                        | Admitted to intensive care | 1.02 (0.49, 1.93)                                                                      | 7.95 (6.22, 10.34)            | 7.74 (3.98, 16.29)                                                                        |
| Atrial flutter         | Non-hospitalized           | 1.00 (0.92, 1.09)                                                                      | 1.34 (1.23, 1.49)             | 1.34 (1.19, 1.53)                                                                         |
|                        | Hospitalized               | 1.01 (0.74, 1.32)                                                                      | 3.51 (2.78, 4.50)             | 3.50 (2.44, 5.08)                                                                         |

|                                   |                            |                   |                      |                      |
|-----------------------------------|----------------------------|-------------------|----------------------|----------------------|
|                                   | Admitted to intensive care | 1.02 (0.69, 1.42) | 8.21 (6.39, 10.76)   | 8.10 (5.36, 12.79)   |
| <b>Inflammatory heart disease</b> | Non-hospitalized           | 1.01 (0.86, 1.15) | 1.51 (1.30, 1.78)    | 1.50 (1.23, 1.88)    |
|                                   | Hospitalized               | 1.01 (0.69, 1.40) | 5.64 (4.02, 8.18)    | 5.62 (3.54, 9.18)    |
|                                   | Admitted to intensive care | 1.03 (0.53, 1.86) | 9.53 (5.59, 16.86)   | 9.34 (4.26, 21.38)   |
| Pericarditis                      | Non-hospitalized           | 1.01 (0.86, 1.15) | 1.39 (1.19, 1.66)    | 1.39 (1.13, 1.75)    |
|                                   | Hospitalized               | 1.01 (0.68, 1.41) | 5.25 (3.60, 7.93)    | 5.22 (3.20, 8.93)    |
|                                   | Admitted to intensive care | 1.02 (0.50, 1.90) | 9.15 (5.12, 16.96)   | 9.04 (3.92, 21.93)   |
| Myocarditis                       | Non-hospitalized           | 1.03 (0.48, 2.00) | 3.50 (2.31, 5.47)    | 3.44 (1.55, 8.13)    |
|                                   | Hospitalized               | 1.03 (0.34, 2.72) | 11.84 (7.21, 20.42)  | 11.46 (3.85, 37.82)  |
|                                   | Admitted to intensive care | 1.07 (0.32, 3.03) | 33.61 (13.71, 92.20) | 31.94 (7.93, 138.18) |
| <b>Ischemic heart disease</b>     | Non-hospitalized           | 1.00 (0.94, 1.05) | 1.26 (1.20, 1.33)    | 1.26 (1.17, 1.36)    |
|                                   | Hospitalized               | 1.00 (0.88, 1.12) | 3.74 (3.24, 4.37)    | 3.73 (3.14, 4.55)    |
|                                   | Admitted to intensive care | 1.01 (0.79, 1.24) | 5.56 (4.69, 6.67)    | 5.54 (4.24, 7.40)    |
| Acute coronary disease            | Non-hospitalized           | 1.00 (0.93, 1.07) | 1.17 (1.10, 1.26)    | 1.17 (1.07, 1.29)    |
|                                   | Hospitalized               | 1.01 (0.85, 1.16) | 3.91 (3.28, 4.73)    | 3.90 (3.13, 4.97)    |
|                                   | Admitted to intensive care | 1.01 (0.74, 1.32) | 6.93 (5.80, 8.39)    | 6.85 (5.01, 9.88)    |
| Myocardial infarction             | Non-hospitalized           | 1.00 (0.93, 1.07) | 1.09 (1.01, 1.20)    | 1.09 (0.98, 1.23)    |
|                                   | Hospitalized               | 1.01 (0.82, 1.20) | 4.32 (3.41, 5.57)    | 4.29 (3.24, 5.92)    |
|                                   | Admitted to intensive care | 1.01 (0.70, 1.40) | 7.90 (6.42, 9.86)    | 7.79 (5.36, 12.07)   |
| Ischemic cardiomyopathy           | Non-hospitalized           | 1.01 (0.91, 1.11) | 1.18 (1.07, 1.32)    | 1.17 (1.03, 1.36)    |
|                                   | Hospitalized               | 1.01 (0.80, 1.23) | 3.29 (2.33, 4.75)    | 3.27 (2.20, 5.03)    |
|                                   | Admitted to intensive care | 1.01 (0.69, 1.42) | 4.08 (3.00, 5.68)    | 4.05 (2.58, 6.52)    |
| Angina                            | Non-hospitalized           | 1.00 (0.94, 1.07) | 1.40 (1.30, 1.51)    | 1.39 (1.27, 1.55)    |
|                                   | Hospitalized               | 1.00 (0.85, 1.17) | 3.31 (2.72, 4.10)    | 3.29 (2.60, 4.32)    |
|                                   | Admitted to intensive care | 1.01 (0.72, 1.35) | 2.82 (1.98, 4.11)    | 2.81 (1.80, 4.54)    |
| <b>Other cardiac disorders</b>    | Non-hospitalized           | 1.00 (0.95, 1.05) | 1.39 (1.33, 1.45)    | 1.39 (1.30, 1.49)    |
|                                   | Hospitalized               | 1.00 (0.87, 1.14) | 3.94 (3.52, 4.44)    | 3.93 (3.32, 4.70)    |
|                                   | Admitted to intensive care | 1.01 (0.82, 1.20) | 6.82 (5.89, 7.99)    | 6.80 (5.41, 8.71)    |
| Heart failure                     | Non-hospitalized           | 1.00 (0.96, 1.04) | 1.39 (1.33, 1.46)    | 1.38 (1.30, 1.48)    |
|                                   | Hospitalized               | 1.00 (0.86, 1.14) | 3.93 (3.50, 4.44)    | 3.92 (3.30, 4.70)    |
|                                   | Admitted to intensive care | 1.01 (0.82, 1.20) | 5.97 (5.12, 7.04)    | 5.96 (4.71, 7.62)    |
| Non-ischemic cardiomyopathy       | Non-hospitalized           | 1.00 (0.93, 1.07) | 1.32 (1.23, 1.42)    | 1.32 (1.20, 1.46)    |
|                                   | Hospitalized               | 1.01 (0.83, 1.18) | 3.17 (2.64, 3.85)    | 3.16 (2.49, 4.09)    |
|                                   | Admitted to intensive care | 1.01 (0.74, 1.32) | 6.00 (4.63, 7.91)    | 5.97 (4.15, 8.82)    |

|                                   |                            |                   |                      |                      |
|-----------------------------------|----------------------------|-------------------|----------------------|----------------------|
| Cardiac arrest                    | Non-hospitalized           | 1.02 (0.61, 1.60) | 0.92 (0.73, 1.20)    | 0.90 (0.54, 1.58)    |
|                                   | Hospitalized               | 1.03 (0.45, 2.09) | 5.54 (3.78, 8.50)    | 5.38 (2.42, 13.36)   |
|                                   | Admitted to intensive care | 1.05 (0.23, 3.83) | 29.05 (20.12, 43.80) | 27.79 (7.51, 123.38) |
| Cardiogenic shock                 | Non-hospitalized           | 1.02 (0.59, 1.65) | 1.16 (0.80, 1.75)    | 1.15 (0.63, 2.21)    |
|                                   | Hospitalized               | 1.03 (0.62, 1.60) | 5.20 (3.06, 9.32)    | 5.05 (2.59, 10.77)   |
|                                   | Admitted to intensive care | 1.05 (0.28, 3.23) | 17.22 (11.92, 26.13) | 16.26 (5.09, 60.44)  |
| <b>Thrombotic disorders</b>       | Non-hospitalized           | 1.00 (0.94, 1.07) | 1.77 (1.67, 1.88)    | 1.76 (1.63, 1.92)    |
|                                   | Hospitalized               | 1.00 (0.84, 1.17) | 6.55 (5.79, 7.51)    | 6.55 (5.36, 8.12)    |
|                                   | Admitted to intensive care | 1.01 (0.75, 1.31) | 14.57 (12.36, 17.40) | 14.42 (10.70, 20.45) |
| Pulmonary embolism                | Non-hospitalized           | 1.00 (0.90, 1.11) | 2.04 (1.88, 2.23)    | 2.04 (1.79, 2.34)    |
|                                   | Hospitalized               | 1.01 (0.78, 1.25) | 9.41 (8.15, 11.06)   | 9.34 (7.21, 12.51)   |
|                                   | Admitted to intensive care | 1.02 (0.62, 1.57) | 21.59 (17.39, 27.35) | 21.21 (13.17, 36.68) |
| Deep vein thrombosis              | Non-hospitalized           | 1.00 (0.90, 1.10) | 1.64 (1.52, 1.79)    | 1.64 (1.46, 1.87)    |
|                                   | Hospitalized               | 1.01 (0.77, 1.28) | 4.40 (3.52, 5.60)    | 4.38 (3.18, 6.17)    |
|                                   | Admitted to intensive care | 1.01 (0.68, 1.43) | 9.28 (7.24, 12.12)   | 9.16 (6.04, 14.68)   |
| Superficial vein thrombosis       | Non-hospitalized           | 1.00 (0.91, 1.10) | 1.39 (1.27, 1.54)    | 1.39 (1.22, 1.60)    |
|                                   | Hospitalized               | 1.01 (0.76, 1.29) | 4.44 (3.66, 5.49)    | 4.43 (3.24, 6.18)    |
|                                   | Admitted to intensive care | 1.02 (0.69, 1.43) | 10.09 (7.88, 13.20)  | 9.93 (6.58, 15.67)   |
| <b>MACE</b>                       | Non-hospitalized           | 1.00 (0.94, 1.06) | 1.27 (1.23, 1.32)    | 1.27 (1.19, 1.36)    |
|                                   | Hospitalized               | 1.00 (0.85, 1.15) | 2.41 (2.21, 2.64)    | 2.40 (2.05, 2.89)    |
|                                   | Admitted to intensive care | 1.01 (0.78, 1.26) | 4.30 (3.82, 4.88)    | 4.27 (3.33, 5.69)    |
| <b>Any cardiovascular outcome</b> | Non-hospitalized           | 1.00 (0.97, 1.03) | 1.41 (1.38, 1.45)    | 1.41 (1.36, 1.47)    |
|                                   | Hospitalized               | 1.00 (0.90, 1.10) | 3.49 (3.26, 3.75)    | 3.48 (3.12, 3.94)    |
|                                   | Admitted to intensive care | 1.00 (0.84, 1.17) | 6.32 (5.69, 7.05)    | 6.28 (5.25, 7.73)    |

\*. Outcomes for pre-exposure period were ascertained until day 30 before the initial positive COVID-19 test result. Outcomes for post-exposure period were ascertained from day 30 after the initial positive COVID-19 test result until end of follow up.

†. Based on care received within the first 30 days after a positive COVID-19 test result.

‡. Adjustment through weighting using predefined and algorithmically selected high-dimensional variables during pre-exposure period.

§. Incidence rate ratio in pre-exposure period served as the referent.

CI, confidence interval; TIA, transient ischemic attack; MACE, major adverse cardiac events.

**Supplementary Table 17. Difference-in-differences analyses of incident rate ratios of cardiovascular outcomes before and after exposure to COVID-19 by care setting of the acute infection compared to historical control**

| Outcome*                          | Incident rate ratio of COVID-19 compared to historical control (95% CI) <sup>†</sup> |                               | Ratio of incident rate ratios of post/pre COVID-19 exposure periods (95% CI) <sup>‡</sup> |
|-----------------------------------|--------------------------------------------------------------------------------------|-------------------------------|-------------------------------------------------------------------------------------------|
|                                   | Pre-COVID-19 exposure period                                                         | Post-COVID-19 exposure period |                                                                                           |
| <b>Cerebrovascular</b>            | 1.00 (0.95, 1.05)                                                                    | 1.45 (1.37, 1.53)             | 1.45 (1.35, 1.56)                                                                         |
| Stroke                            | 1.00 (0.94, 1.06)                                                                    | 1.44 (1.36, 1.54)             | 1.44 (1.33, 1.58)                                                                         |
| TIA                               | 1.01 (0.93, 1.07)                                                                    | 1.36 (1.25, 1.49)             | 1.35 (1.22, 1.52)                                                                         |
| <b>Dysrhythmia</b>                | 1.00 (0.97, 1.03)                                                                    | 1.53 (1.47, 1.61)             | 1.53 (1.45, 1.63)                                                                         |
| Atrial fibrillation               | 1.00 (0.95, 1.05)                                                                    | 1.52 (1.45, 1.59)             | 1.52 (1.42, 1.62)                                                                         |
| Sinus tachycardia                 | 1.00 (0.94, 1.06)                                                                    | 1.72 (1.63, 1.83)             | 1.72 (1.59, 1.87)                                                                         |
| Sinus bradycardia                 | 1.00 (0.96, 1.05)                                                                    | 1.34 (1.26, 1.42)             | 1.33 (1.24, 1.43)                                                                         |
| Ventricular arrhythmia            | 1.00 (0.93, 1.07)                                                                    | 2.04 (1.71, 2.48)             | 2.04 (1.69, 2.51)                                                                         |
| Atrial flutter                    | 1.00 (0.93, 1.07)                                                                    | 1.73 (1.60, 1.89)             | 1.73 (1.57, 1.94)                                                                         |
| <b>Inflammatory heart disease</b> | 1.00 (0.88, 1.12)                                                                    | 2.07 (1.82, 2.38)             | 2.07 (1.75, 2.49)                                                                         |
| Pericarditis                      | 1.00 (0.88, 1.13)                                                                    | 1.86 (1.62, 2.16)             | 1.86 (1.56, 2.26)                                                                         |
| Myocarditis                       | 1.03 (0.58, 1.70)                                                                    | 8.66 (6.1, 12.68)             | 8.51 (4.62, 16.45)                                                                        |
| <b>Ischemic heart disease</b>     | 1.00 (0.95, 1.05)                                                                    | 1.48 (1.37, 1.62)             | 1.48 (1.35, 1.64)                                                                         |
| Acute coronary disease            | 1.00 (0.94, 1.06)                                                                    | 1.67 (1.52, 1.86)             | 1.66 (1.49, 1.89)                                                                         |
| Myocardial infarction             | 1.00 (0.93, 1.08)                                                                    | 1.67 (1.55, 1.81)             | 1.67 (1.51, 1.86)                                                                         |
| Ischemic cardiomyopathy           | 1.00 (0.93, 1.08)                                                                    | 1.57 (1.30, 1.93)             | 1.57 (1.28, 1.96)                                                                         |
| Angina                            | 1.00 (0.94, 1.06)                                                                    | 1.20 (1.12, 1.30)             | 1.20 (1.10, 1.33)                                                                         |
| <b>Other cardiac disorders</b>    | 1.00 (0.96, 1.04)                                                                    | 1.56 (1.50, 1.63)             | 1.56 (1.48, 1.66)                                                                         |
| Heart failure                     | 1.00 (0.96, 1.04)                                                                    | 1.55 (1.49, 1.63)             | 1.55 (1.47, 1.65)                                                                         |
| Non-ischemic cardiomyopathy       | 1.00 (0.94, 1.06)                                                                    | 1.48 (1.38, 1.59)             | 1.48 (1.36, 1.62)                                                                         |
| Cardiac arrest                    | 1.03 (0.67, 1.49)                                                                    | 2.63 (2.10, 3.37)             | 2.57 (1.65, 4.12)                                                                         |
| Cardiogenic shock                 | 1.01 (0.69, 1.42)                                                                    | 2.45 (1.89, 3.27)             | 2.43 (1.60, 3.84)                                                                         |
| <b>Thrombotic disorders</b>       | 1.00 (0.95, 1.05)                                                                    | 2.55 (2.43, 2.69)             | 2.55 (2.38, 2.75)                                                                         |
| Pulmonary embolism                | 1.01 (0.91, 1.11)                                                                    | 3.61 (3.37, 3.90)             | 3.57 (3.16, 4.03)                                                                         |

|                                                                                                                                                                                                                                                                                                                                                                                                                                                                                                                                                                                                 |                   |                   |                   |
|-------------------------------------------------------------------------------------------------------------------------------------------------------------------------------------------------------------------------------------------------------------------------------------------------------------------------------------------------------------------------------------------------------------------------------------------------------------------------------------------------------------------------------------------------------------------------------------------------|-------------------|-------------------|-------------------|
| Deep vein thrombosis                                                                                                                                                                                                                                                                                                                                                                                                                                                                                                                                                                            | 1.01 (0.93, 1.09) | 2.05 (1.90, 2.22) | 2.03 (1.82, 2.27) |
| Superficial vein thrombosis                                                                                                                                                                                                                                                                                                                                                                                                                                                                                                                                                                     | 1.01 (0.91, 1.10) | 1.99 (1.83, 2.17) | 1.97 (1.75, 2.24) |
| <b>MACE</b>                                                                                                                                                                                                                                                                                                                                                                                                                                                                                                                                                                                     | 1.00 (0.95, 1.05) | 1.58 (1.54, 1.64) | 1.58 (1.50, 1.68) |
| <b>Any cardiovascular outcome</b>                                                                                                                                                                                                                                                                                                                                                                                                                                                                                                                                                               | 1.00 (0.97, 1.03) | 1.58 (1.54, 1.63) | 1.58 (1.53, 1.65) |
| <p>*. Outcomes for pre-exposure period were ascertained until day 30 before the initial positive COVID-19 test result. Outcomes for post-exposure period were ascertained from day 30 after the initial positive COVID-19 test result until end of follow up.</p> <p>†. Adjustment through weighting using predefined and algorithmically selected high-dimensional variables during pre-exposure period.</p> <p>‡. Incidence rate ratio in pre-exposure period served as the referent.</p> <p>CI, confidence interval; TIA, transient ischemic attack; MACE, major adverse cardiac events.</p> |                   |                   |                   |



**Supplementary Table 18. Difference-in-differences analyses of incident rate ratios of cardiovascular outcomes before and after exposure to COVID-19 by care setting of the acute infection compared to historical control**

| Outcome*               | Care setting <sup>†</sup>  | Incident rate ratio of COVID-19 compared to historical control (95% CI) <sup>‡</sup> |                               | Ratio of incident rate ratios of post/pre COVID-19 exposure periods (95% CI) <sup>§</sup> |
|------------------------|----------------------------|--------------------------------------------------------------------------------------|-------------------------------|-------------------------------------------------------------------------------------------|
|                        |                            | Pre-COVID-19 exposure period                                                         | Post-COVID-19 exposure period |                                                                                           |
| Cerebrovascular        | Non-hospitalized           | 1.00 (0.95, 1.05)                                                                    | 1.27 (1.20, 1.35)             | 1.27 (1.18, 1.37)                                                                         |
|                        | Hospitalized               | 1.00 (0.84, 1.17)                                                                    | 2.83 (2.46, 3.28)             | 2.82 (2.30, 3.50)                                                                         |
|                        | Admitted to intensive care | 1.01 (0.75, 1.31)                                                                    | 3.82 (3.06, 4.84)             | 3.81 (2.70, 5.49)                                                                         |
| Stroke                 | Non-hospitalized           | 1.00 (0.94, 1.06)                                                                    | 1.22 (1.14, 1.31)             | 1.21 (1.12, 1.34)                                                                         |
|                        | Hospitalized               | 1.01 (0.82, 1.20)                                                                    | 2.98 (2.55, 3.52)             | 2.97 (2.34, 3.82)                                                                         |
|                        | Admitted to intensive care | 1.01 (0.71, 1.38)                                                                    | 4.19 (3.27, 5.44)             | 4.16 (2.82, 6.38)                                                                         |
| TIA                    | Non-hospitalized           | 1.01 (0.92, 1.09)                                                                    | 1.28 (1.18, 1.41)             | 1.28 (1.14, 1.45)                                                                         |
|                        | Hospitalized               | 1.01 (0.80, 1.22)                                                                    | 2.32 (1.85, 2.97)             | 2.31 (1.73, 3.18)                                                                         |
|                        | Admitted to intensive care | 1.01 (0.68, 1.44)                                                                    | 2.62 (1.77, 3.96)             | 2.59 (1.56, 4.48)                                                                         |
| Dysrhythmia            | Non-hospitalized           | 1.00 (0.96, 1.04)                                                                    | 1.25 (1.21, 1.30)             | 1.25 (1.19, 1.32)                                                                         |
|                        | Hospitalized               | 1.00 (0.88, 1.12)                                                                    | 3.63 (3.31, 4.00)             | 3.62 (3.13, 4.22)                                                                         |
|                        | Admitted to intensive care | 1.01 (0.80, 1.23)                                                                    | 7.37 (6.50, 8.43)             | 7.31 (5.82, 9.57)                                                                         |
| Atrial fibrillation    | Non-hospitalized           | 1.00 (0.94, 1.06)                                                                    | 1.27 (1.21, 1.33)             | 1.26 (1.17, 1.37)                                                                         |
|                        | Hospitalized               | 1.01 (0.85, 1.16)                                                                    | 3.72 (3.26, 4.28)             | 3.71 (3.05, 4.56)                                                                         |
|                        | Admitted to intensive care | 1.01 (0.77, 1.27)                                                                    | 7.16 (6.10, 8.50)             | 7.10 (5.39, 9.74)                                                                         |
| Sinus tachycardia      | Non-hospitalized           | 1.00 (0.94, 1.06)                                                                    | 1.29 (1.21, 1.38)             | 1.29 (1.19, 1.41)                                                                         |
|                        | Hospitalized               | 1.01 (0.81, 1.21)                                                                    | 4.68 (4.06, 5.48)             | 4.67 (3.70, 6.02)                                                                         |
|                        | Admitted to intensive care | 1.01 (0.71, 1.37)                                                                    | 9.57 (7.77, 11.98)            | 9.46 (6.60, 14.35)                                                                        |
| Sinus bradycardia      | Non-hospitalized           | 1.00 (0.95, 1.05)                                                                    | 1.14 (1.08, 1.21)             | 1.13 (1.05, 1.23)                                                                         |
|                        | Hospitalized               | 1.01 (0.80, 1.23)                                                                    | 2.47 (2.13, 2.89)             | 2.45 (1.92, 3.22)                                                                         |
|                        | Admitted to intensive care | 1.01 (0.74, 1.32)                                                                    | 4.19 (3.36, 5.29)             | 4.16 (2.95, 6.05)                                                                         |
| Ventricular arrhythmia | Non-hospitalized           | 1.01 (0.93, 1.08)                                                                    | 1.43 (1.33, 1.56)             | 1.43 (1.29, 1.59)                                                                         |
|                        | Hospitalized               | 1.01 (0.81, 1.21)                                                                    | 4.05 (3.31, 5.04)             | 4.03 (3.09, 5.38)                                                                         |
|                        | Admitted to intensive care | 1.02 (0.49, 1.93)                                                                    | 8.33 (6.52, 10.83)            | 8.10 (4.15, 17.09)                                                                        |
| Atrial flutter         | Non-hospitalized           | 1.00 (0.92, 1.09)                                                                    | 1.35 (1.23, 1.50)             | 1.35 (1.19, 1.54)                                                                         |
|                        | Hospitalized               | 1.01 (0.74, 1.32)                                                                    | 3.52 (2.79, 4.52)             | 3.51 (2.45, 5.10)                                                                         |

|                                   |                            |                   |                       |                       |
|-----------------------------------|----------------------------|-------------------|-----------------------|-----------------------|
|                                   | Admitted to intensive care | 1.02 (0.69, 1.42) | 8.25 (6.41, 10.80)    | 8.13 (5.38, 12.83)    |
| <b>Inflammatory heart disease</b> | Non-hospitalized           | 1.00 (0.86, 1.15) | 1.57 (1.35, 1.86)     | 1.56 (1.28, 1.96)     |
|                                   | Hospitalized               | 1.01 (0.69, 1.40) | 5.87 (4.19, 8.51)     | 5.84 (3.68, 9.56)     |
|                                   | Admitted to intensive care | 1.02 (0.52, 1.83) | 9.92 (5.82, 17.55)    | 9.83 (4.48, 22.50)    |
| Pericarditis                      | Non-hospitalized           | 1.00 (0.86, 1.15) | 1.42 (1.21, 1.70)     | 1.41 (1.15, 1.78)     |
|                                   | Hospitalized               | 1.01 (0.68, 1.41) | 5.35 (3.67, 8.08)     | 5.31 (3.26, 9.09)     |
|                                   | Admitted to intensive care | 1.02 (0.50, 1.90) | 9.31 (5.22, 17.28)    | 9.20 (3.99, 22.35)    |
| Myocarditis                       | Non-hospitalized           | 1.03 (0.48, 2.01) | 5.7 (3.72, 9.01)      | 5.59 (2.56, 13.25)    |
|                                   | Hospitalized               | 1.04 (0.34, 2.73) | 19.31 (11.67, 33.26)  | 18.63 (6.30, 62.69)   |
|                                   | Admitted to intensive care | 1.08 (0.32, 3.04) | 54.65 (22.43, 150.89) | 52.01 (12.83, 224.22) |
| <b>Ischemic heart disease</b>     | Non-hospitalized           | 1.00 (0.94, 1.05) | 1.15 (1.10, 1.22)     | 1.15 (1.07, 1.24)     |
|                                   | Hospitalized               | 1.00 (0.88, 1.12) | 3.43 (2.98, 4.00)     | 3.42 (2.88, 4.17)     |
|                                   | Admitted to intensive care | 1.01 (0.79, 1.24) | 5.10 (4.31, 6.12)     | 5.08 (3.89, 6.79)     |
| Acute coronary disease            | Non-hospitalized           | 1.00 (0.93, 1.07) | 1.17 (1.10, 1.26)     | 1.17 (1.06, 1.29)     |
|                                   | Hospitalized               | 1.00 (0.85, 1.16) | 3.90 (3.27, 4.71)     | 3.88 (3.12, 4.96)     |
|                                   | Admitted to intensive care | 1.01 (0.74, 1.33) | 6.91 (5.78, 8.36)     | 6.83 (4.99, 9.85)     |
| Myocardial infarction             | Non-hospitalized           | 1.00 (0.93, 1.08) | 1.15 (1.06, 1.26)     | 1.15 (1.03, 1.29)     |
|                                   | Hospitalized               | 1.01 (0.82, 1.20) | 4.54 (3.59, 5.85)     | 4.51 (3.41, 6.22)     |
|                                   | Admitted to intensive care | 1.01 (0.70, 1.40) | 8.30 (6.75, 10.37)    | 8.19 (5.63, 12.70)    |
| Ischemic cardiomyopathy           | Non-hospitalized           | 1.01 (0.91, 1.11) | 1.09 (0.99, 1.22)     | 1.09 (0.95, 1.26)     |
|                                   | Hospitalized               | 1.01 (0.80, 1.23) | 3.05 (2.16, 4.40)     | 3.03 (2.04, 4.67)     |
|                                   | Admitted to intensive care | 1.01 (0.69, 1.42) | 3.78 (2.78, 5.26)     | 3.75 (2.39, 6.04)     |
| Angina                            | Non-hospitalized           | 1.00 (0.94, 1.06) | 1.13 (1.06, 1.23)     | 1.13 (1.03, 1.25)     |
|                                   | Hospitalized               | 1.01 (0.85, 1.17) | 2.69 (2.20, 3.32)     | 2.67 (2.11, 3.50)     |
|                                   | Admitted to intensive care | 1.01 (0.72, 1.35) | 2.29 (1.60, 3.33)     | 2.28 (1.46, 3.68)     |
| <b>Other cardiac disorders</b>    | Non-hospitalized           | 1.00 (0.95, 1.05) | 1.28 (1.23, 1.34)     | 1.28 (1.20, 1.37)     |
|                                   | Hospitalized               | 1.00 (0.87, 1.14) | 3.64 (3.25, 4.10)     | 3.63 (3.06, 4.34)     |
|                                   | Admitted to intensive care | 1.01 (0.82, 1.20) | 6.30 (5.44, 7.38)     | 6.28 (5.00, 8.04)     |
| Heart failure                     | Non-hospitalized           | 1.00 (0.96, 1.04) | 1.27 (1.22, 1.34)     | 1.27 (1.20, 1.35)     |
|                                   | Hospitalized               | 1.00 (0.87, 1.14) | 3.60 (3.21, 4.07)     | 3.59 (3.02, 4.31)     |
|                                   | Admitted to intensive care | 1.01 (0.82, 1.20) | 5.48 (4.70, 6.46)     | 5.47 (4.32, 6.99)     |
| Non-ischemic cardiomyopathy       | Non-hospitalized           | 1.00 (0.93, 1.07) | 1.23 (1.14, 1.32)     | 1.22 (1.11, 1.36)     |
|                                   | Hospitalized               | 1.01 (0.83, 1.18) | 2.94 (2.46, 3.58)     | 2.93 (2.32, 3.80)     |
|                                   | Admitted to intensive care | 1.01 (0.74, 1.32) | 5.58 (4.30, 7.36)     | 5.55 (3.85, 8.20)     |

|                                   |                            |                   |                      |                      |
|-----------------------------------|----------------------------|-------------------|----------------------|----------------------|
| Cardiac arrest                    | Non-hospitalized           | 1.02 (0.61, 1.60) | 0.95 (0.75, 1.23)    | 0.93 (0.56, 1.62)    |
|                                   | Hospitalized               | 1.03 (0.45, 2.09) | 5.68 (3.88, 8.72)    | 5.52 (2.48, 13.70)   |
|                                   | Admitted to intensive care | 1.04 (0.23, 3.84) | 29.77 (20.65, 44.91) | 28.48 (7.71, 126.58) |
| Cardiogenic shock                 | Non-hospitalized           | 1.02 (0.59, 1.65) | 1.20 (0.84, 1.81)    | 1.18 (0.65, 2.30)    |
|                                   | Hospitalized               | 1.03 (0.62, 1.61) | 5.39 (3.19, 9.68)    | 5.23 (2.67, 11.19)   |
|                                   | Admitted to intensive care | 1.05 (0.28, 3.24) | 17.86 (12.4, 27.11)  | 16.85 (5.28, 62.66)  |
| <b>Thrombotic disorders</b>       | Non-hospitalized           | 1.00 (0.94, 1.07) | 1.97 (1.86, 2.09)    | 1.96 (1.81, 2.14)    |
|                                   | Hospitalized               | 1.00 (0.84, 1.17) | 7.30 (6.46, 8.36)    | 7.29 (5.97, 9.04)    |
|                                   | Admitted to intensive care | 1.01 (0.75, 1.31) | 16.23 (13.77, 19.40) | 16.07 (11.91, 22.80) |
| Pulmonary embolism                | Non-hospitalized           | 1.00 (0.90, 1.11) | 2.59 (2.39, 2.83)    | 2.59 (2.27, 2.97)    |
|                                   | Hospitalized               | 1.01 (0.78, 1.25) | 11.93 (10.35, 14.03) | 11.86 (9.16, 15.85)  |
|                                   | Admitted to intensive care | 1.02 (0.62, 1.57) | 27.40 (22.11, 34.75) | 26.94 (16.67, 46.54) |
| Deep vein thrombosis              | Non-hospitalized           | 1.00 (0.91, 1.10) | 1.71 (1.58, 1.86)    | 1.71 (1.51, 1.94)    |
|                                   | Hospitalized               | 1.01 (0.77, 1.28) | 4.57 (3.65, 5.81)    | 4.55 (3.30, 6.40)    |
|                                   | Admitted to intensive care | 1.01 (0.68, 1.43) | 9.63 (7.51, 12.58)   | 9.50 (6.27, 15.23)   |
| Superficial vein thrombosis       | Non-hospitalized           | 1.00 (0.91, 1.10) | 1.49 (1.35, 1.65)    | 1.48 (1.31, 1.71)    |
|                                   | Hospitalized               | 1.01 (0.76, 1.29) | 4.75 (3.92, 5.87)    | 4.73 (3.46, 6.61)    |
|                                   | Admitted to intensive care | 1.01 (0.69, 1.42) | 10.79 (8.43, 14.12)  | 10.69 (7.08, 16.89)  |
| <b>MACE</b>                       | Non-hospitalized           | 1.00 (0.94, 1.06) | 1.31 (1.27, 1.36)    | 1.31 (1.23, 1.41)    |
|                                   | Hospitalized               | 1.00 (0.85, 1.15) | 2.49 (2.28, 2.73)    | 2.48 (2.12, 2.98)    |
|                                   | Admitted to intensive care | 1.01 (0.78, 1.26) | 4.45 (3.95, 5.04)    | 4.41 (3.44, 5.87)    |
| <b>Any cardiovascular outcome</b> | Non-hospitalized           | 1.00 (0.97, 1.03) | 1.37 (1.34, 1.40)    | 1.37 (1.32, 1.42)    |
|                                   | Hospitalized               | 1.00 (0.90, 1.10) | 3.37 (3.16, 3.63)    | 3.37 (3.01, 3.81)    |
|                                   | Admitted to intensive care | 1.00 (0.84, 1.17) | 6.11 (5.50, 6.82)    | 6.07 (5.07, 7.48)    |

\*. Outcomes for pre-exposure period were ascertained until day 30 before the initial positive COVID-19 test result. Outcomes for post-exposure period were ascertained from day 30 after the initial positive COVID-19 test result until end of follow up.

†. Based on care received within the first 30 days after a positive COVID-19 test result.

‡. Adjustment through weighting using predefined and algorithmically selected high-dimensional variables during pre-exposure period.

§. Incidence rate ratio in pre-exposure period served as the referent.

CI, confidence interval; TIA, transient ischemic attack; MACE, major adverse cardiac events.

**Supplementary Table 19. Sensitivity analysis for MACE and any cardiovascular outcome compared to contemporary and historical controls**

| Analysis                                                                                                                                                                         | MACE<br>Hazard ratio (95% CI)* |                      | Any cardiovascular outcome<br>Hazard ratio (95% CI)* |                      |
|----------------------------------------------------------------------------------------------------------------------------------------------------------------------------------|--------------------------------|----------------------|------------------------------------------------------|----------------------|
|                                                                                                                                                                                  | Contemporary                   | Historical           | Contemporary                                         | Historical           |
| Used 300 algorithmically selected high dimensional variables                                                                                                                     | 1.56<br>(1.51, 1.61)           | 1.61<br>(1.56, 1.66) | 1.64<br>(1.59, 1.69)                                 | 1.59<br>(1.55, 1.64) |
| Did not use any high dimensional variables                                                                                                                                       | 1.46<br>(1.42, 1.51)           | 1.55<br>(1.50, 1.59) | 1.66<br>(1.62, 1.69)                                 | 1.65<br>(1.61, 1.68) |
| Doubly robust                                                                                                                                                                    | 1.42<br>(1.38, 1.47)           | 1.47<br>(1.43, 1.52) | 1.56<br>(1.53, 1.60)                                 | 1.52<br>(1.48, 1.55) |
| *. Outcomes were ascertained from day 30 after the initial positive COVID-19 test result until end of follow up.<br>CI, confidence interval; MACE, major adverse cardiac events. |                                |                      |                                                      |                      |

**Supplementary Table 20. Sensitivity analyses for MACE and any cardiovascular outcome by care setting of the acute infection compared to contemporary and historical controls**

| Analysis                                                     | Care Setting <sup>†</sup>  | MACE<br>Hazard ratio<br>(95% CI)* |                      | Any cardiovascular outcome<br>Hazard ratio<br>(95% CI)* |                      |
|--------------------------------------------------------------|----------------------------|-----------------------------------|----------------------|---------------------------------------------------------|----------------------|
|                                                              |                            | Contemporary                      | Historical           | Contemporary                                            | Historical           |
| Used 300 algorithmically selected high dimensional variables | Non-hospitalized           | 1.26<br>(1.22, 1.30)              | 1.30<br>(1.26, 1.35) | 1.39<br>(1.36, 1.43)                                    | 1.35<br>(1.32, 1.39) |
|                                                              | Hospitalized               | 2.42<br>(2.21, 2.64)              | 2.50<br>(2.29, 2.73) | 3.43<br>(3.21, 3.66)                                    | 3.33<br>(3.12, 3.56) |
|                                                              | Admitted to intensive care | 4.36<br>(3.88, 4.91)              | 4.51<br>(4.01, 5.08) | 6.20<br>(5.61, 6.84)                                    | 6.02<br>(5.46, 6.65) |
| Did not use any high dimensional variables                   | Non-hospitalized           | 1.26<br>(1.22, 1.31)              | 1.34<br>(1.29, 1.38) | 1.40<br>(1.36, 1.43)                                    | 1.39<br>(1.36, 1.43) |
|                                                              | Hospitalized               | 2.42<br>(2.22, 2.64)              | 2.56<br>(2.35, 2.79) | 3.44<br>(3.22, 3.67)                                    | 3.42<br>(3.20, 3.66) |
|                                                              | Admitted to intensive care | 4.37<br>(3.88, 4.92)              | 4.62<br>(4.11, 5.21) | 6.21<br>(5.63, 6.86)                                    | 6.18<br>(5.60, 6.82) |
| Doubly robust                                                | Non-hospitalized           | 1.25<br>(1.21, 1.29)              | 1.30<br>(1.25, 1.34) | 1.40<br>(1.37, 1.44)                                    | 1.36<br>(1.32, 1.39) |
|                                                              | Hospitalized               | 2.36<br>(2.16, 2.57)              | 2.44<br>(2.24, 2.66) | 3.44<br>(3.22, 3.67)                                    | 3.31<br>(3.12, 3.56) |
|                                                              | Admitted to intensive care | 4.38<br>(3.91, 4.91)              | 4.55<br>(4.06, 5.10) | 6.41<br>(5.83, 7.05)                                    | 6.21<br>(5.65, 6.82) |

\*. Outcomes were ascertained from day 30 after the initial positive COVID-19 test result until end of follow up.  
†. Based on care received within the first 30 days after a positive COVID-19 test result.  
CI, confidence interval; MACE, major adverse cardiac events.

**Supplementary Table 21. Risks of incident post-acute COVID-19 myocarditis and pericarditis compared to contemporary control in analyses where cohort participants are censored at time of vaccination**

| Outcome*     | Hazard Ratio (95% CI) <sup>†</sup> | COVID-19 burden per 1000 persons at 12 months (95% CI) <sup>†</sup> | Contemporary control burden per 1000 persons at 12 months (95% CI) <sup>†</sup> | Burden difference per 1000 persons at 12 months (95% CI) <sup>†</sup> |
|--------------|------------------------------------|---------------------------------------------------------------------|---------------------------------------------------------------------------------|-----------------------------------------------------------------------|
|              | COVID-19 vs Contemporary control   |                                                                     |                                                                                 |                                                                       |
| Myocarditis  | 5.31 (3.75, 7.53)                  | 0.37 (0.26, 0.53)                                                   | 0.07 (0.06, 0.08)                                                               | 0.30 (0.19, 0.46)                                                     |
| Pericarditis | 1.84 (1.59, 2.12)                  | 2.11 (1.83, 2.43)                                                   | 1.15 (1.12, 1.18)                                                               | 0.96 (0.68, 1.28)                                                     |

\*. Outcomes were ascertained from day 30 after the initial positive COVID-19 test result until the first occurrence of COVID-19 vaccination or end of follow up.

†. Adjustment through inverse probability weighting using predefined and algorithmically selected high-dimensional variables.

Before cohort enrollment, 347 (0.23%) of the COVID-19 participants and 9,170 (0.16%) of the contemporary control participants received COVID-19 vaccine. In total, 95,223 (61.93%) participants in COVID-19 group received COVID-19 vaccine (42,065 (44.18%), 45,450 (47.73%) and 7708 (8.09%) received BNT162b2, mRNA-1273 and Ad26.COV2.S, respectively) and 3,173,169 (56.29%) participants in contemporary group received COVID-19 vaccine (1,349,844 (42.54%), 1,609,399 (50.72%) and 213,926 (6.74%) received BNT162b2, mRNA-1273 and Ad26.COV2.S, respectively) before end of follow up.

CI, confidence interval

**Supplementary Table 22. Risks of incident post-acute COVID-19 myocarditis and pericarditis compared to contemporary control in analyses adjusting for time varying COVID-19 vaccination**

| Outcome*     | Hazard Ratio (95% CI) <sup>†</sup> | COVID-19 burden per 1000 persons at 12 months (95% CI) <sup>†</sup> | Contemporary control burden per 1000 persons at 12 months (95% CI) <sup>†</sup> | Burden difference per 1000 persons at 12 months (95% CI) <sup>†</sup> |
|--------------|------------------------------------|---------------------------------------------------------------------|---------------------------------------------------------------------------------|-----------------------------------------------------------------------|
|              | COVID-19 vs Contemporary control   |                                                                     |                                                                                 |                                                                       |
| Myocarditis  | 5.34 (3.76, 7.60)                  | 0.50 (0.35, 0.71)                                                   | 0.09 (0.08, 1.11)                                                               | 0.41 (0.26, 0.62)                                                     |
| Pericarditis | 1.83 (1.59, 2.11)                  | 2.24 (1.94, 2.58)                                                   | 1.22 (1.18, 1.27)                                                               | 1.01 (0.71, 1.36)                                                     |

\*. Outcomes were ascertained from day 30 after the initial positive COVID-19 test result until end of follow up.  
†. Adjustment through inverse probability weighting using predefined and algorithmically selected high-dimensional variables.  
Before cohort enrollment, 347 (0.23%) of the COVID-19 participants and 9,170 (0.16%) of the contemporary control participants received COVID-19 vaccine. In total, 95,223 (61.93%) participants in COVID-19 group received COVID-19 vaccine (42,065 (44.18%), 45,450 (47.73%) and 7708 (8.09%) received BNT162b2, mRNA-1273 and Ad26.COVS, respectively) and 3,173,169 (56.29%) participants in contemporary group received COVID-19 vaccine (1,349,844 (42.54%), 1,609,399 (50.72%) and 213,926 (6.74%) received BNT162b2, mRNA-1273 and Ad26.COVS, respectively) before end of follow up.  
CI, confidence interval

**Supplementary Table 23. Risks of incident post-acute COVID-19 myocarditis and pericarditis compared to historical control in analyses where cohort participants are censored at time of vaccination**

| Outcome*     | Hazard Ratio (95% CI)†         | COVID-19 burden per 1000 persons at 12 months (95% CI) † | Historical control burden per 1000 persons at 12 months (95% CI) † | Burden difference per 1000 persons at 12 months (95% CI) † |
|--------------|--------------------------------|----------------------------------------------------------|--------------------------------------------------------------------|------------------------------------------------------------|
|              | COVID-19 vs Historical control |                                                          |                                                                    |                                                            |
| Myocarditis  | 8.67 (6.05, 12.42)             | 0.37 (0.26, 0.53)                                        | 0.04 (0.04, 0.05)                                                  | 0.33 (0.22, 0.49)                                          |
| Pericarditis | 1.87 (1.62, 2.16)              | 2.11 (1.83, 2.43)                                        | 1.13 (1.10, 1.16)                                                  | 0.98 (0.70, 1.30)                                          |

\*. Outcomes were ascertained from day 30 after the initial positive COVID-19 test result until the first occurrence of COVID-19 vaccination or end of follow up.  
†. Adjustment through inverse probability weighting using predefined and algorithmically selected high-dimensional variables.  
Before cohort enrollment, 347 (0.23%) of the COVID-19 participants received COVID-19 vaccine. 95,223 (61.93%) participants in COVID-19 group received COVID-19 vaccine (42,065 (44.18%), 45,450 (47.73%) and 7708 (8.09%) received BNT162b2, mRNA-1273 and Ad26.COV2.S, respectively) before end of follow up.  
CI, confidence interval



**Supplementary Table 24. Risks of incident post-acute COVID-19 myocarditis and pericarditis compared to historical control in analyses adjusting for time varying COVID-19 vaccination**

| Outcome*     | Hazard Ratio (95% CI) <sup>†</sup> | COVID-19 burden per 1000 persons at 12 months (95% CI) <sup>†</sup> | Historical control burden per 1000 persons at 12 months (95% CI) <sup>†</sup> | Burden difference per 1000 persons at 12 months (95% CI) <sup>†</sup> |
|--------------|------------------------------------|---------------------------------------------------------------------|-------------------------------------------------------------------------------|-----------------------------------------------------------------------|
|              | COVID-19 vs Historical control     |                                                                     |                                                                               |                                                                       |
| Myocarditis  | 9.85 (6.35, 15.28)                 | 0.50 (0.35, 0.71)                                                   | 0.04 (0.04, 0.05)                                                             | 0.46 (0.31, 0.67)                                                     |
| Pericarditis | 1.67 (1.42, 1.97)                  | 2.24 (1.94, 2.58)                                                   | 1.11 (1.08, 1.15)                                                             | 1.12 (0.82, 1.46)                                                     |

\*. Outcomes were ascertained from day 30 after the initial positive COVID-19 test result until end of follow up.  
†. Adjustment through inverse probability weighting using predefined and algorithmically selected high-dimensional variables.  
Before cohort enrollment, 347 (0.23%) of the COVID-19 participants received COVID-19 vaccine. 95,223 (61.93%) participants in COVID-19 group received COVID-19 vaccine (42,065 (44.18%), 45,450 (47.73%) and 7708 (8.09%) received BNT162b2, mRNA-1273 and Ad26.COV2.S, respectively) before end of follow up.  
CI, confidence interval

Supplementary Table 25. Positive and negative outcome controls

| Outcome*                                                                                                                                                                                                                                                                                                    | Hazard Ratio (95% CI) †                             |                                                   |
|-------------------------------------------------------------------------------------------------------------------------------------------------------------------------------------------------------------------------------------------------------------------------------------------------------------|-----------------------------------------------------|---------------------------------------------------|
|                                                                                                                                                                                                                                                                                                             | COVID-19 vs contemporary control (as the reference) | COVID-19 vs historical control (as the reference) |
| <b>Positive outcome control</b>                                                                                                                                                                                                                                                                             |                                                     |                                                   |
| Fatigue                                                                                                                                                                                                                                                                                                     | 1.81 (1.75, 1.88)                                   | 1.87 (1.80, 1.94)                                 |
| <b>Negative outcome controls</b>                                                                                                                                                                                                                                                                            |                                                     |                                                   |
| Hypertrichosis                                                                                                                                                                                                                                                                                              | 0.92 (0.69, 1.23)                                   | 0.89 (0.67, 1.19)                                 |
| Melanoma in situ                                                                                                                                                                                                                                                                                            | 1.02 (0.98, 1.06)                                   | 1.03 (0.99, 1.07)                                 |
| Sickle cell trait                                                                                                                                                                                                                                                                                           | 1.04 (0.99, 1.10)                                   | 1.09 (0.84, 1.42)                                 |
| Perforation of the tympanic membrane                                                                                                                                                                                                                                                                        | 0.98 (0.80, 1.20)                                   | 0.98 (0.94, 1.02)                                 |
| Malignant neoplasm of the tongue                                                                                                                                                                                                                                                                            | 0.98 (0.92, 1.04)                                   | 0.93 (0.88, 1.00)                                 |
| B-cell Lymphoma                                                                                                                                                                                                                                                                                             | 1.04 (0.98, 1.10)                                   | 1.10 (0.83, 1.46)                                 |
| Hodgkin's Lymphoma                                                                                                                                                                                                                                                                                          | 1.08 (0.85, 1.39)                                   | 1.08 (0.84, 1.38)                                 |
| <p>*. Outcomes were ascertained from day 30 after the initial positive COVID-19 test result until end of follow up.<br/>           †. Adjustment through inverse probability weighting using predefined and algorithmically selected high-dimensional variables.<br/>           CI, confidence interval</p> |                                                     |                                                   |

**Supplementary Table 26. Negative exposure control; risks and 12-month burdens of cardiovascular outcomes of those vaccinated for influenza on even-numbered days compared to those vaccinated on odd-numbered days**

| Outcome*                          | Hazard Ratio (95% CI) <sup>†</sup>             | Influenza vaccination on even days burden per 1000 persons at 12 months (95% CI) <sup>†</sup> | Influenza vaccination on odd days burden per 1000 persons at 12 months (95% CI) <sup>†</sup> | Absolute burden difference per 1000 persons at 12 months (95% CI) <sup>†</sup> |
|-----------------------------------|------------------------------------------------|-----------------------------------------------------------------------------------------------|----------------------------------------------------------------------------------------------|--------------------------------------------------------------------------------|
|                                   | Influenza vaccination on even days vs odd days |                                                                                               |                                                                                              |                                                                                |
| <b>Cerebrovascular</b>            | 1.01 (0.96, 1.06)                              | 16.14 (15.36, 16.96)                                                                          | 15.98 (15.69, 16.28)                                                                         | 0.15 (-0.63, 0.97)                                                             |
| Stroke                            | 1.04 (0.98, 1.10)                              | 11.94 (11.27, 12.65)                                                                          | 11.51 (11.27, 11.76)                                                                         | 0.43 (-0.24, 1.13)                                                             |
| TIA                               | 0.98 (0.90, 1.06)                              | 6.22 (5.74, 6.73)                                                                             | 6.35 (6.16, 6.53)                                                                            | -0.13 (-0.61, 0.38)                                                            |
| <b>Dysrhythmia</b>                | 0.98 (0.95, 1.01)                              | 47.16 (45.80, 48.56)                                                                          | 48.16 (47.64, 48.68)                                                                         | -1.00 (-2.36, 0.41)                                                            |
| Atrial fibrillation               | 0.97 (0.93, 1.01)                              | 23.48 (22.53, 24.47)                                                                          | 24.25 (23.89, 24.62)                                                                         | -0.77 (-1.72, 0.22)                                                            |
| Sinus tachycardia                 | 1.01 (0.95, 1.07)                              | 11.54 (10.89, 12.23)                                                                          | 11.46 (11.21, 11.70)                                                                         | 0.09 (-0.56, 0.78)                                                             |
| Sinus bradycardia                 | 0.98 (0.93, 1.03)                              | 15.33 (14.58, 16.13)                                                                          | 15.67 (15.38, 15.96)                                                                         | -0.33 (-1.09, 0.46)                                                            |
| Ventricular arrhythmia            | 0.99 (0.93, 1.06)                              | 9.08 (8.50, 9.69)                                                                             | 9.17 (8.95, 9.39)                                                                            | -0.10 (-0.67, 0.52)                                                            |
| Atrial flutter                    | 1.01 (0.93, 1.09)                              | 6.90 (6.40, 7.44)                                                                             | 6.85 (6.66, 7.04)                                                                            | 0.05 (-0.45, 0.59)                                                             |
| <b>Inflammatory heart disease</b> | 0.99 (0.87, 1.13)                              | 2.17 (1.90, 2.48)                                                                             | 2.19 (2.08, 2.29)                                                                            | -0.02 (-0.29, 0.29)                                                            |
| Pericarditis                      | 0.99 (0.86, 1.14)                              | 2.06 (1.79, 2.36)                                                                             | 2.08 (1.97, 2.18)                                                                            | -0.02 (-0.28, 0.28)                                                            |
| Myocarditis                       | 0.96 (0.54, 1.70)                              | 0.12 (0.07, 0.21)                                                                             | 0.12 (0.10, 0.15)                                                                            | -0.01 (-0.06, 0.09)                                                            |
| <b>Ischemic heart disease</b>     | 1.01 (0.97, 1.05)                              | 20.59 (19.78, 21.43)                                                                          | 20.42 (20.09, 20.74)                                                                         | 0.17 (-0.64, 1.01)                                                             |
| Acute coronary disease            | 1.00 (0.95, 1.05)                              | 13.62 (12.96, 14.31)                                                                          | 13.60 (13.34, 13.86)                                                                         | 0.02 (-0.64, 0.71)                                                             |
| Myocardial infarction             | 0.99 (0.93, 1.06)                              | 8.37 (7.86, 8.91)                                                                             | 8.42 (8.21, 8.63)                                                                            | -0.05 (-0.56, 0.49)                                                            |
| Ischemic cardiomyopathy           | 0.94 (0.86, 1.02)                              | 5.44 (5.00, 5.92)                                                                             | 5.81 (5.63, 5.99)                                                                            | -0.37 (-0.81, 0.11)                                                            |
| Angina                            | 0.97 (0.91, 1.04)                              | 8.50 (7.94, 9.09)                                                                             | 8.77 (8.55, 8.99)                                                                            | -0.27 (-0.83, 0.32)                                                            |
| <b>Other cardiac disorders</b>    | 1.00 (0.96, 1.04)                              | 29.57 (28.50, 30.68)                                                                          | 29.61 (29.21, 30.02)                                                                         | -0.04 (-1.12, 1.07)                                                            |
| Heart failure                     | 0.99 (0.95, 1.03)                              | 26.91 (25.89, 27.97)                                                                          | 27.21 (26.82, 27.60)                                                                         | -0.31 (-1.33, 0.75)                                                            |
| Non-ischemic cardiomyopathy       | 1.02 (0.96, 1.09)                              | 10.15 (9.53, 10.80)                                                                           | 9.92 (9.68, 10.15)                                                                           | 0.23 (-0.38, 0.89)                                                             |
| Cardiac arrest                    | 0.98 (0.81, 1.17)                              | 1.02 (0.85, 1.23)                                                                             | 1.05 (0.97, 1.12)                                                                            | -0.02 (-0.19, 0.18)                                                            |
| Cardiogenic shock                 | 0.95 (0.75, 1.21)                              | 0.68 (0.54, 0.87)                                                                             | 0.72 (0.65, 0.78)                                                                            | -0.04 (-0.18, 0.15)                                                            |
| <b>Thrombotic disorders</b>       | 1.00 (0.95, 1.06)                              | 11.30 (10.65, 11.99)                                                                          | 11.26 (11.02, 11.51)                                                                         | 0.04 (-0.61, 0.72)                                                             |
| Pulmonary embolism                | 1.05 (0.96, 1.15)                              | 4.85 (4.43, 5.30)                                                                             | 4.63 (4.47, 4.79)                                                                            | 0.22 (-0.20, 0.67)                                                             |
| Deep vein thrombosis              | 0.99 (0.91, 1.08)                              | 5.85 (5.39, 6.35)                                                                             | 5.91 (5.73, 6.08)                                                                            | -0.06 (-0.52, 0.44)                                                            |
| Superficial vein thrombosis       | 0.98 (0.90, 1.08)                              | 4.54 (4.14, 4.98)                                                                             | 4.62 (4.47, 4.78)                                                                            | -0.08 (-0.48, 0.36)                                                            |

|                                                                                                                                                                                                                                                                                                                                             |                   |                         |                         |                     |
|---------------------------------------------------------------------------------------------------------------------------------------------------------------------------------------------------------------------------------------------------------------------------------------------------------------------------------------------|-------------------|-------------------------|-------------------------|---------------------|
| <b>MACE</b>                                                                                                                                                                                                                                                                                                                                 | 1.01 (0.98, 1.04) | 49.88 (48.53, 51.27)    | 49.27 (48.77, 49.78)    | 0.61 (-0.74, 2.00)  |
| <b>Any cardiovascular outcome</b>                                                                                                                                                                                                                                                                                                           | 1.00 (0.98, 1.02) | 102.73 (100.68, 104.83) | 102.75 (101.99, 103.52) | -0.02 (-2.07, 2.07) |
| <p>*. Outcomes were ascertained from day 30 after the Influenza vaccination until end of follow up<br/> †. Adjustment through inverse probability weighting using predefined and algorithmically selected high-dimensional variables.<br/> CI, confidence interval; TIA, transient ischemic attack; MACE, major adverse cardiac events.</p> |                   |                         |                         |                     |
